# Supplementary material for: Adsorption of Selected Molecules on (TiO2)20 Nano-Clusters: A Density-Functional-Theory Study
Source: MDPI journal article supplement (doi:10.3390/nanomanufacturing2030010), 2022-09-01
Supplement: s1 [file s1]

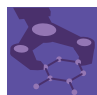

## Article

# Supplementary Materials: Adsorption of Selected Molecules on (TiO<sub>2</sub>)<sub>20</sub> Nano-Clusters: A Density-Functional-Theory Study

Faustino Aguilera-Granja <sup>1,\*</sup>, Rodrigo H. Aguilera-del-Toro <sup>2,3</sup> and Erik Díaz-Cervantes <sup>4</sup>

<sup>1</sup> Instituto de Física, Universidad Autónoma de San Luis Potosí, San Luis Potosí 78000, Mexico

<sup>2</sup> Donostia International Physics Center (DIPC), 20018 Donostia, Spain; rodrigo.humberto.aguilera@uva.es

<sup>3</sup> Centro de Física de Materiales-Materials Physics Center (CFM-MPC), 20018 Donostia, Spain

<sup>4</sup> Departamento de Alimentos, Centro Interdisciplinario del Noreste (CINUG), Universidad de Guanajuato, Tierra Blanca, Guanajuato 37975, Mexico; e.diaz@ugto.mx

\* Correspondence: faustino@ifisica.uaslp.mx

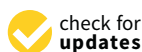

**Citation:** Aguilera-Granja, F.; Aguilera-del-Toro, R.H.; Díaz-Cervantes, E. Adsorption of Selected Molecules on (TiO<sub>2</sub>)<sub>20</sub> Nano-Clusters: A Density-Functional-Theory Study. *Nanomanufacturing* **2022**, *1*, 1–72. <https://doi.org/>

Academic Editor: Andres Castellanos-Gomez

Received:

Accepted:

Published:

**Publisher's Note:** MDPI stays neutral with regard to jurisdictional claims in published maps and institutional affiliations.

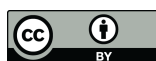

**Copyright:** © 2022 by the authors. Licensee MDPI, Basel, Switzerland. This article is an open access article distributed under the terms and conditions of the Creative Commons Attribution (CC BY) license (<https://creativecommons.org/licenses/by/4.0/>).

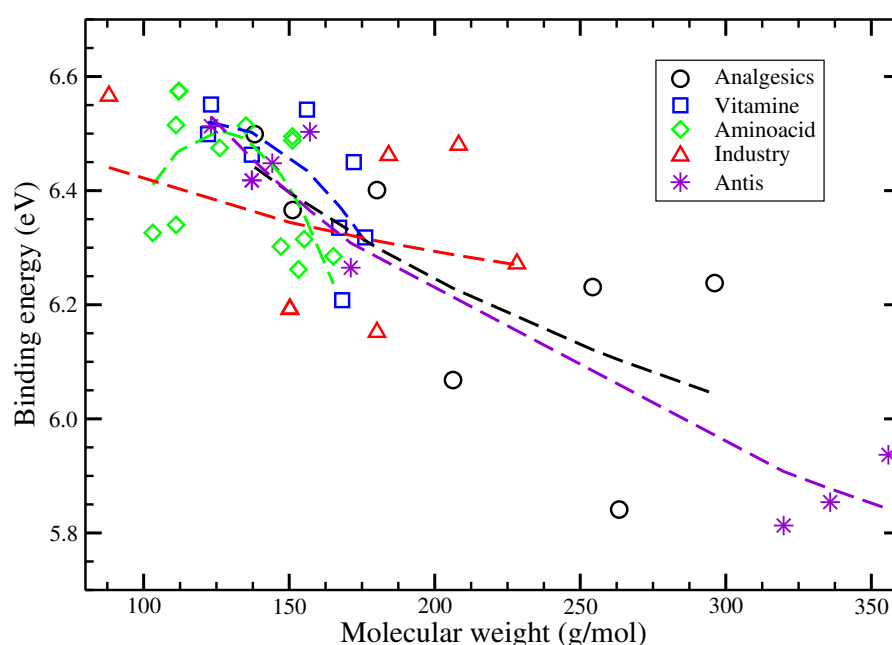

**Figure S1.** Illustration of the Binding energies of the different molecules here considered as a function of the molecular weight. Calculated with the SIESTA code within the PBE approximation. The lines are a visual aid to illustrate the dependency.

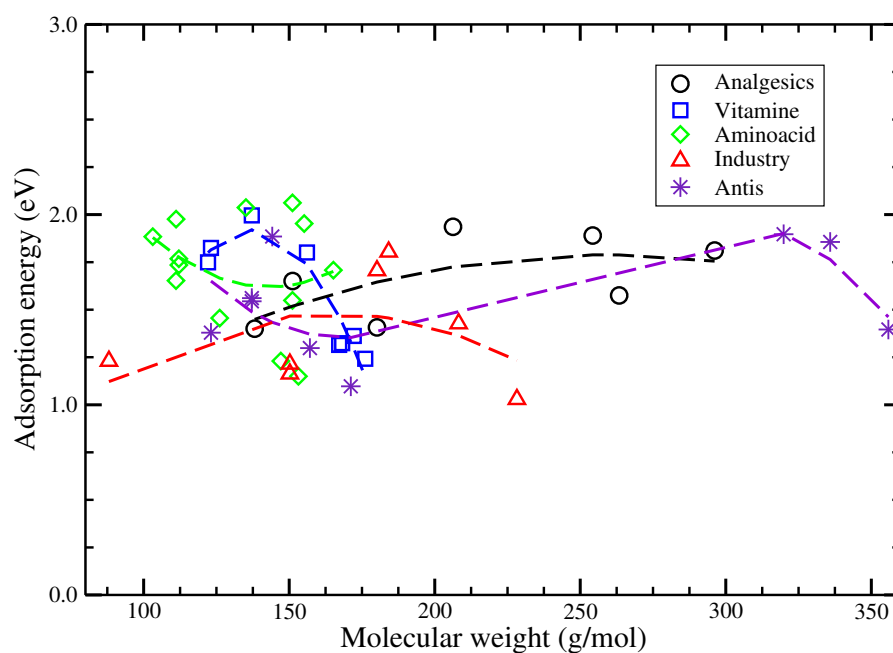

**Figure S2.** Illustration of the Adsorption energies of the different molecules here considered as a function of the molecular weight. Calculated with the SIESTA code within the PBE approximation. The lines are a visual aid to illustrate the dependency.

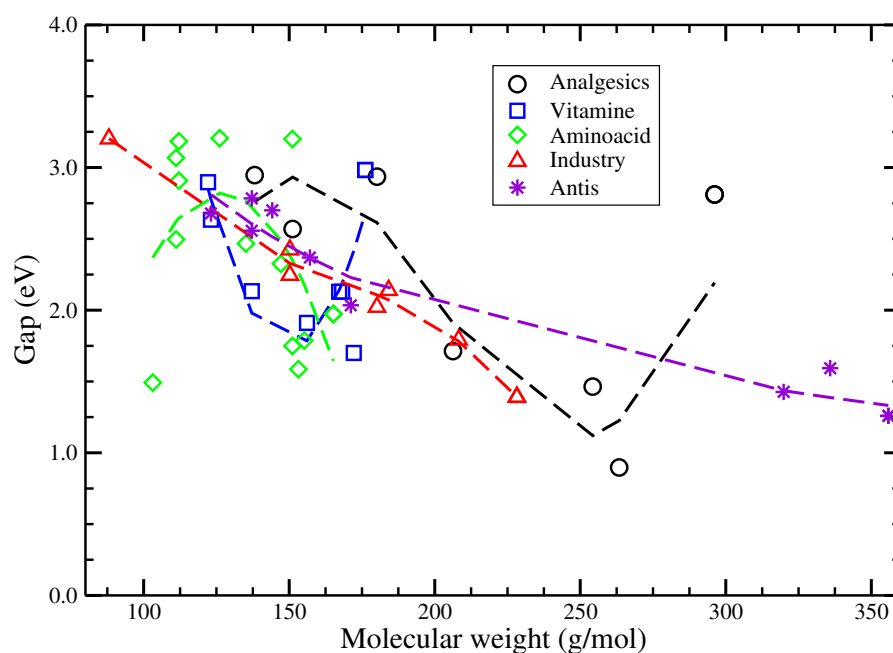

**Figure S3.** Illustration of the Homo-Lumo gap of the different molecules here considered as a function of the molecular weight. Calculated with the SIESTA code within the PBE approximation. The lines are a visual aid to illustrate the dependency.

## 1. supplementary information

| Type               | Molecule       | PBE (SIESTA)                |                            |                       |
|--------------------|----------------|-----------------------------|----------------------------|-----------------------|
|                    |                | Ebind (eV/atom)<br>Molecule | Ebind (eV/atom)<br>Complex | Eads (eV)<br>Molecule |
| Vitaminic-like     | B3(1)          | 4.862                       | 6.499                      | 1.749                 |
|                    | B3(2)          | 5.014                       | 6.551                      | 1.825                 |
|                    | B10            | 4.875                       | 6.463                      | 1.996                 |
|                    | B13            | 5.071                       | 6.542                      | 1.801                 |
|                    | B6(1)          | 4.718                       | 6.335                      | 1.315                 |
|                    | B6(2)          | 4.474                       | 6.208                      | 1.324                 |
|                    | K3             | 5.160                       | 6.450                      | 1.362                 |
|                    | C              | 4.573                       | 6.318                      | 1.242                 |
| Aminoacid/hormones | DMG            | 4.132                       | 6.326                      | 1.884                 |
|                    | Cytosine       | 4.708                       | 6.515                      | 1.653                 |
|                    | Histamine      | 4.318                       | 6.340                      | 1.976                 |
|                    | Uracil-Bind O  | 4.905                       | 6.574                      | 1.735                 |
|                    | Uracil-Bind N  |                             | 6.575                      | 1.768                 |
|                    | Thymine        | 4.765                       | 6.475                      | 1.456                 |
|                    | Adenine        | 4.917                       | 6.514                      | 2.037                 |
|                    | Glutamic       | 4.415                       | 6.302                      | 1.230                 |
|                    | Guanine-Bind O | 4.924                       | 6.488                      | 1.549                 |
|                    | Guanine-Bind N |                             | 6.495                      | 2.062                 |
|                    | Dopamine       | 4.528                       | 6.262                      | 1.150                 |
|                    | Histidine      | 4.525                       | 6.315                      | 1.953                 |
|                    | Fenilalanine   | 4.663                       | 6.285                      | 1.708                 |

| Type              | Molecule           | PBE (SIESTA)                |                            |                       |
|-------------------|--------------------|-----------------------------|----------------------------|-----------------------|
|                   |                    | Ebind (eV/atom)<br>Molecule | Ebind (eV/atom)<br>Complex | Eads (eV)<br>Molecule |
| Analgesics        | Salicylic          | 4.988                       | 6.499                      | 1.400                 |
|                   | Paracetamol        | 4.744                       | 6.366                      | 1.651                 |
|                   | Aspirin            | 4.966                       | 6.401                      | 1.407                 |
|                   | Ibuprofen          | 4.536                       | 6.068                      | 1.936                 |
|                   | Tramadol           | 4.391                       | 5.841                      | 1.575                 |
| Anti-inflammatory | Enantyum           | 4.995                       | 6.231                      | 1.890                 |
|                   | Diclofenac         | 4.897                       | 6.238                      | 1.811                 |
| Antibiotics       | Pyrazinamide       | 4.845                       | 6.513                      | 1.379                 |
|                   | Isoniazid-Bind O   | 4.698                       | 6.418                      | 1.544                 |
|                   | Isoniazid-Bind N   |                             | 6.418                      | 1.561                 |
| Anti-virals       | Favipiravir        | 4.913                       | 6.503                      | 1.298                 |
|                   | Chloroquine        | 4.440                       | 5.813                      | 1.897                 |
|                   | Hydroxychloroquine | 4.534                       | 5.854                      | 1.856                 |
| Anti-parasites    | Aminoquinoline     | 4.986                       | 6.448                      | 1.885                 |
|                   | Metronidazole      | 4.458                       | 6.265                      | 1.097                 |
|                   | Amodiaquine        | 4.705                       | 5.937                      | 1.396                 |
| Industry          | Biotinidase        | 4.568                       | 6.566                      | 1.230                 |
|                   | Thymol             | 4.497                       | 6.193                      | 1.215                 |
|                   | Carva              | 4.498                       | 6.192                      | 1.163                 |
|                   | Glucose            | 4.263                       | 6.152                      | 1.706                 |
|                   | Galic-acid         | 4.970                       | 6.462                      | 1.804                 |
|                   | Anthraquinone      | 5.424                       | 6.480                      | 1.427                 |
|                   | Resveratrol        | 4.980                       | 6.272                      | 1.029                 |

| <b>B3LYP (G09)</b> |                |                             |                            |                       |
|--------------------|----------------|-----------------------------|----------------------------|-----------------------|
| Type               | Molecule       | Ebind (eV/atom)<br>Molecule | Ebind (eV/atom)<br>Complex | Eads (eV)<br>Molecule |
| Vitaminic-like     | B3(1)          | 4.867                       | 5.854                      | 1.515                 |
|                    | B3(2)          | 5.010                       | 5.893                      | 1.449                 |
|                    | B10            | 4.896                       | 5.838                      | 1.730                 |
|                    | B13            | 4.983                       | 5.874                      | 1.278                 |
|                    | B6(1)          | 4.711                       | 5.736                      | 1.173                 |
|                    | B6(2)          | 4.481                       | 5.634                      | 1.141                 |
|                    | K3             | 5.196                       | 5.863                      | 1.230                 |
|                    | C              | 4.509                       | 5.699                      | 1.206                 |
| Aminoacid/hormones | DMG            | 4.175                       | 5.696                      | 1.563                 |
|                    | Cytosine       | 4.680                       | 5.852                      | 1.823                 |
|                    | Histamine      | 4.348                       | 5.718                      | 1.847                 |
|                    | Uracil-Bind O  | 4.863                       | 5.893                      | 1.436                 |
|                    | Uracil-Bind N  |                             | 6.167                      | 1.389                 |
|                    | Thymine        | 6.065                       | 6.092                      | 1.369                 |
|                    | Adenine        | 4.847                       | 5.851                      | 1.628                 |
|                    | Glutamic       | 4.401                       | 5.688                      | 1.169                 |
|                    | Guanine-Bind O | 4.836                       | 5.834                      | 1.504                 |
|                    | Guanine-Bind N |                             | 5.834                      | 1.491                 |
|                    | Dopamine       | 4.567                       | 5.681                      | 0.852                 |
|                    | Histidine      | 4.504                       | 5.702                      | 1.552                 |
|                    | Fenilalanine   | 4.699                       | 5.711                      | 1.385                 |

| <b>B3LYP (G09)</b> |                    |                             |                            |                       |
|--------------------|--------------------|-----------------------------|----------------------------|-----------------------|
| Type               | Molecule           | Ebind (eV/atom)<br>Molecule | Ebind (eV/atom)<br>Complex | Eads (eV)<br>Molecule |
| Analgesics         | Salicylic          | 4.993                       | 5.866                      | 1.432                 |
|                    | Paracetamol        | 4.772                       | 5.769                      | 1.584                 |
|                    | Aspirin            | 4.969                       | 5.805                      | 1.294                 |
|                    | Ibuprofen          | 4.614                       | 5.572                      | 1.366                 |
|                    | Tramadol           | 4.451                       | 5.398                      | 1.020                 |
| Anti-inflammatory  | Enantyum           | 5.039                       | 5.722                      | 1.343                 |
|                    | Diclofenac         | 4.890                       | 5.694                      | 1.273                 |
| Antibiotics        | Pyrazinamide       | 4.802                       | 5.854                      | 1.410                 |
|                    | Isoniazid-Bind O   | 4.670                       | 5.784                      | 1.426                 |
|                    | Isoniazid-Bind N   |                             | 5.781                      | 1.231                 |
| Anti-virals        | Favipiravir        | 4.829                       | 5.844                      | 1.359                 |
|                    | Chloroquine        | 4.495                       | 5.385                      | 1.354                 |
|                    | Hydroxychloroquine | 4.483                       | 5.371                      | 1.299                 |
| Anti-parasites     | Aminoquinoline     | 5.025                       | 5.844                      | 1.650                 |
|                    | Metronidazole      | 4.358                       | 5.642                      | 0.988                 |
|                    | Amodiaquine        | 4.838                       | 5.492                      | 0.617                 |
| Industry           | Biotinidase        | 4.561                       | 5.877                      | 1.222                 |
|                    | Thymol             | 4.590                       | 5.650                      | 0.958                 |
|                    | Carva              | 4.591                       | 5.651                      | 1.003                 |
|                    | Glucose            | 4.225                       | 5.563                      | 1.373                 |
|                    | Galic-acid         | 4.923                       | 5.828                      | 1.423                 |
|                    | Anthraquinone      | 5.454                       | 5.912                      | 1.181                 |
|                    | Resveratrol        | 5.014                       | 5.736                      | 0.587                 |

| M06-L (G09)        |                |                             |                            |                       |
|--------------------|----------------|-----------------------------|----------------------------|-----------------------|
| Type               | Molecule       | Ebind (eV/atom)<br>Molecule | Ebind (eV/atom)<br>Complex | Eads (eV)<br>Molecule |
| Vitaminic-like     | B3(1)          | 4.898                       | 6.299                      | 1.648                 |
|                    | B3(2)          | 5.056                       | 6.346                      | 1.505                 |
|                    | B10            | 4.938                       | 6.274                      | 1.801                 |
|                    | B13            | 5.035                       | 6.324                      | 1.455                 |
|                    | B6(1)          | 4.748                       | 6.153                      | 1.319                 |
|                    | B6(2)          | 4.496                       | 6.030                      | 1.272                 |
|                    | K3             | 5.266                       | 6.287                      | 1.357                 |
| Aminoacid/hormones | C              | 4.541                       | 6.118                      | 1.322                 |
|                    | DMG            | 4.168                       | 6.126                      | 1.576                 |
|                    | Cytosine       | 4.692                       | 6.303                      | 1.828                 |
|                    | Histamine      | 4.339                       | 6.144                      | 1.989                 |
|                    | Uracil-Bind O  | 4.894                       | 6.355                      | 1.521                 |
|                    | Uracil-Bind N  |                             | 6.638                      | 1.593                 |
|                    | Thymine        | 6.097                       | 6.542                      | 1.431                 |
|                    | Adenine        | 4.858                       | 6.293                      | 1.788                 |
|                    | Glutamic       | 4.418                       | 6.108                      | 1.270                 |
|                    | Guanine-Bind O | 4.854                       | 6.271                      | 1.569                 |
|                    | Guanine-Bind N |                             | 6.273                      | 1.757                 |
|                    | Dopamine       | 4.589                       | 6.088                      | 0.968                 |
|                    | Histidine      | 4.514                       | 6.115                      | 1.604                 |
|                    | Fenilalanine   | 4.729                       | 6.115                      | 1.449                 |

| M06-L (G09)       |                    |                             |                            |                       |
|-------------------|--------------------|-----------------------------|----------------------------|-----------------------|
| Type              | Molecule           | Ebind (eV/atom)<br>Molecule | Ebind (eV/atom)<br>Complex | Eads (eV)<br>Molecule |
| Analgesics        | Salicylic          | 5.049                       | 6.311                      | 1.534                 |
|                   | Paracetamol        | 4.808                       | 6.189                      | 1.669                 |
|                   | Aspirin            | 5.025                       | 6.226                      | 1.431                 |
|                   | Ibuprofen          | 4.646                       | 5.937                      | 1.500                 |
|                   | Tramadol           | 4.474                       | 5.726                      | 1.351                 |
| Anti-inflammatory | Enantyum           | 5.099                       | 6.098                      | 1.535                 |
|                   | Diclofenac         | 4.966                       | 6.086                      | 1.435                 |
| Antibiotics       | Pyrazinamide       | 4.823                       | 6.301                      | 1.460                 |
|                   | Isoniazid-Bind O   | 4.687                       | 6.215                      | 1.541                 |
|                   | Isoniazid-Bind N   |                             | 6.213                      | 1.390                 |
| Anti-virals       | Favipiravir        | 4.861                       | 6.289                      | 1.422                 |
|                   | Chloroquine        | 4.518                       | 5.703                      | 1.743                 |
|                   | Hydroxychloroquine | 4.506                       | 5.686                      | 1.707                 |
| Anti-parasites    | Aminoquinoline     | 5.067                       | 6.272                      | 1.900                 |
|                   | Metronidazole      | 4.375                       | 6.054                      | 1.151                 |
|                   | Amodiaquine        | 4.880                       | 5.821                      | 1.080                 |
| Industry          | Biotinidase        | 4.584                       | 6.348                      | 1.207                 |
|                   | Thymol             | 4.617                       | 6.045                      | 1.079                 |
|                   | Carva              | 4.617                       | 6.045                      | 1.110                 |
|                   | Glucose            | 4.230                       | 5.957                      | 1.542                 |
|                   | Galic-acid         | 4.981                       | 6.263                      | 1.504                 |
|                   | Anthraquinone      | 5.539                       | 6.329                      | 1.416                 |
|                   | Resveratrol        | 5.071                       | 6.125                      | 0.750                 |

### 1.1. coordinates

#### Vitaminic-like

##### B3(1)

74

C 0.642832 5.287764 1.019334

H 0.876245 6.376607 1.070211

N 0.142904 4.740412 2.149805

C 0.878339 4.574599 -0.184890  
H 1.289708 5.090672 -1.077815  
C -0.160048 3.428532 2.104297  
C 0.579371 3.198767 -0.214136  
H -0.574822 2.970417 3.031018  
C 0.038173 2.606176 0.957928  
C -0.270813 1.150875 0.961031  
O -0.983823 0.646459 1.938337  
H -1.119449 -0.434402 1.690328  
O 0.179157 0.429806 -0.015469  
H 0.748456 2.576141 -1.118382  
O -0.730492 -4.062415 -4.069800  
O -4.774514 -6.451338 2.835433  
O 3.064551 -4.858249 1.654981  
O 2.068084 -8.668860 1.204511  
Ti -1.356313 -3.607557 1.397672  
Ti -3.080438 -5.794384 2.271477  
Ti -4.791518 -8.175476 2.116788  
O 4.066005 -7.758069 2.541841  
O 1.122811 -8.465666 -1.336559  
Ti -0.689060 -3.588086 -2.251869  
Ti 1.690287 -4.031807 0.697198  
O -0.155982 -1.779733 -2.014795  
O -1.718248 -7.808880 -1.141641  
Ti -3.728522 -8.412911 -0.597952  
Ti -2.192863 -9.410587 2.027688  
Ti 3.524278 -9.489474 2.098710  
Ti -0.129128 -6.403816 2.094377  
Ti -0.239921 -8.397518 -5.373353  
Ti 2.998803 -8.891467 -0.669597  
Ti 0.221381 -1.614023 -0.208649  
Ti 2.786337 -6.693313 1.658173  
Ti -0.606359 -9.403891 -0.677677  
Ti 0.641037 -9.986786 2.007432  
Ti 1.804982 -8.489059 -3.277609  
Ti -2.328309 -5.896154 -1.303577  
Ti 1.717984 -6.133720 -1.393924  
Ti -2.102267 -8.640355 -3.116705  
Ti -0.740917 -5.904661 -4.006684  
O -2.852951 -3.940286 2.442560  
O 4.148287 -9.941895 0.430758  
O 1.039818 -6.120671 0.492266  
O -3.979392 -6.529962 -0.958742  
O -1.061921 -10.062236 -2.282128  
O 0.146458 -4.322152 2.216964  
O -0.518991 -8.360649 1.543123  
O 2.259540 -6.725911 -3.130940  
O 2.221876 -10.552812 2.903498  
O 1.380627 -6.762117 2.998050  
O -1.851910 -5.468911 0.661929  
O 3.265807 -9.319852 -2.448643  
O -2.368831 -6.513796 -3.334676  
O -5.286340 -8.740933 0.411524  
O -0.448011 -6.615064 -5.754133

O -0.160516 -7.857774 -3.544850  
O 2.293196 -4.454779 -1.089735  
O -2.414741 -9.923633 0.247755  
O 0.423982 -10.662441 0.328182  
O -3.138472 -7.671268 1.333418  
O 1.469109 -9.072997 -5.054884  
O 1.820417 -2.155729 0.559342  
O -0.153342 -3.582874 -0.252137  
O -1.885647 -9.149719 -4.923288  
O -2.386755 -4.045481 -1.752836  
O -1.655556 -6.393072 3.245456  
O -0.953733 -10.535317 2.822711  
O -3.850669 -9.510286 2.960302  
O 3.323756 -7.067813 -0.417412  
O -1.157476 -1.706325 1.157799  
O -0.129182 -5.554049 -2.076675  
O -3.746321 -9.037771 -2.348886

**B3(2)**

74

C 0.642832 5.287764 1.019334  
H 0.876245 6.376607 1.070211  
N 0.142904 4.740412 2.149805  
C 0.878339 4.574599 -0.184890  
H 1.289708 5.090672 -1.077815  
C -0.160048 3.428532 2.104297  
C 0.579371 3.198767 -0.214136  
H -0.574822 2.970417 3.031018  
C 0.038173 2.606176 0.957928  
C -0.270813 1.150875 0.961031  
O -0.983823 0.646459 1.938337  
H -1.119449 -0.434402 1.690328  
O 0.179157 0.429806 -0.015469  
H 0.748456 2.576141 -1.118382  
O -0.730492 -4.062415 -4.069800  
O -4.774514 -6.451338 2.835433  
O 3.064551 -4.858249 1.654981  
O 2.068084 -8.668860 1.204511  
Ti -1.356313 -3.607557 1.397672  
Ti -3.080438 -5.794384 2.271477  
Ti -4.791518 -8.175476 2.116788  
O 4.066005 -7.758069 2.541841  
O 1.122811 -8.465666 -1.336559  
Ti -0.689060 -3.588086 -2.251869  
Ti 1.690287 -4.031807 0.697198  
O -0.155982 -1.779733 -2.014795  
O -1.718248 -7.808880 -1.141641  
Ti -3.728522 -8.412911 -0.597952  
Ti -2.192863 -9.410587 2.027688  
Ti 3.524278 -9.489474 2.098710  
Ti -0.129128 -6.403816 2.094377  
Ti -0.239921 -8.397518 -5.373353  
Ti 2.998803 -8.891467 -0.669597  
Ti 0.221381 -1.614023 -0.208649  
Ti 2.786337 -6.693313 1.658173

Ti -0.606359 -9.403891 -0.677677  
Ti 0.641037 -9.986786 2.007432  
Ti 1.804982 -8.489059 -3.277609  
Ti -2.328309 -5.896154 -1.303577  
Ti 1.717984 -6.133720 -1.393924  
Ti -2.102267 -8.640355 -3.116705  
Ti -0.740917 -5.904661 -4.006684  
O -2.852951 -3.940286 2.442560  
O 4.148287 -9.941895 0.430758  
O 1.039818 -6.120671 0.492266  
O -3.979392 -6.529962 -0.958742  
O -1.061921 -10.062236 -2.282128  
O 0.146458 -4.322152 2.216964  
O -0.518991 -8.360649 1.543123  
O 2.259540 -6.725911 -3.130940  
O 2.221876 -10.552812 2.903498  
O 1.380627 -6.762117 2.998050  
O -1.851910 -5.468911 0.661929  
O 3.265807 -9.319852 -2.448643  
O -2.368831 -6.513796 -3.334676  
O -5.286340 -8.740933 0.411524  
O -0.448011 -6.615064 -5.754133  
O -0.160516 -7.857774 -3.544850  
O 2.293196 -4.454779 -1.089735  
O -2.414741 -9.923633 0.247755  
O 0.423982 -10.662441 0.328182  
O -3.138472 -7.671268 1.333418  
O 1.469109 -9.072997 -5.054884  
O 1.820417 -2.155729 0.559342  
O -0.153342 -3.582874 -0.252137  
O -1.885647 -9.149719 -4.923288  
O -2.386755 -4.045481 -1.752836  
O -1.655556 -6.393072 3.245456  
O -0.953733 -10.535317 2.822711  
O -3.850669 -9.510286 2.960302  
O 3.323756 -7.067813 -0.417412  
O -1.157476 -1.706325 1.157799  
O -0.129182 -5.554049 -2.076675  
O -3.746321 -9.037771 -2.348886

**B10**

77

C 0.046520 5.440615 1.085028  
N 0.149734 6.822478 0.990908  
H 0.063104 7.322814 1.881665  
H 0.957164 7.153376 0.452882  
C -0.692357 4.833122 2.150051  
C 0.620072 4.607706 0.073419  
H 1.197239 5.081153 -0.749916  
H -1.127624 5.480758 2.941267  
C -0.869348 3.441563 2.188977  
C 0.448826 3.217563 0.119467  
H -1.447984 2.972300 3.012557  
C -0.304792 2.612805 1.171985  
C -0.497272 1.157673 1.173282



O -1.263004 0.613410 2.104248  
H -1.324926 -0.436276 1.859115  
O 0.072824 0.432514 0.255323  
H 0.890269 2.569413 -0.667073  
O -0.853248 -3.940721 -3.964686  
O -4.819845 -6.543257 2.858668  
O 2.981133 -4.845567 1.761209  
O 2.045686 -8.666993 1.211386  
Ti -1.426164 -3.648876 1.470044  
Ti -3.128307 -5.856964 2.303742  
Ti -4.796978 -8.263816 2.142590  
O 4.023402 -7.744258 2.573814  
O 1.112764 -8.417115 -1.312573  
Ti -0.788659 -3.513117 -2.132049  
Ti 1.607446 -4.007744 0.802237  
O -0.290669 -1.708982 -1.845643  
O -1.730542 -7.796829 -1.107606  
Ti -3.721220 -8.449155 -0.573263  
Ti -2.198227 -9.498538 2.028632  
Ti 3.510923 -9.466033 2.100879  
Ti -0.196010 -6.433215 2.144136  
Ti -0.238924 -8.239246 -5.330654  
Ti 2.996053 -8.825027 -0.654495  
Ti 0.112533 -1.574897 -0.040116  
Ti 2.712348 -6.675158 1.720744  
Ti -0.601790 -9.398012 -0.687838  
Ti 0.639803 -10.013314 1.993017  
Ti 1.800768 -8.378407 -3.250332  
Ti -2.387483 -5.889501 -1.239859  
Ti 1.692963 -6.071235 -1.319290  
Ti -2.104123 -8.588141 -3.105362  
Ti -0.798272 -5.782309 -3.930361  
O -2.957559 -4.006629 2.465112  
O 4.161584 -9.869117 0.429362  
O 0.984011 -6.107257 0.557464  
O -4.020132 -6.553611 -0.883288  
O -1.049325 -10.022261 -2.311156  
O 0.070171 -4.341210 2.310523  
O -0.544139 -8.402148 1.591359  
O 2.249908 -6.620883 -3.064884  
O 2.221960 -10.573670 2.882117  
O 1.317295 -6.803257 3.053110  
O -1.861053 -5.536721 0.729957  
O 3.269768 -9.214986 -2.443071  
O -2.416100 -6.447772 -3.267267  
O -5.281756 -8.804602 0.427362  
O -0.457245 -6.450485 -5.683247  
O -0.177548 -7.753542 -3.498637  
O 2.255100 -4.401048 -0.979995  
O -2.403305 -9.956910 0.226659  
O 0.438831 -10.662036 0.294261  
O -3.145069 -7.746121 1.375287  
O 1.471531 -8.918646 -5.043653  
O 1.723414 -2.136266 0.705193

O -0.216301 -3.576044 -0.153606  
O -1.882673 -9.026082 -4.926039  
O -2.468240 -4.022417 -1.610187  
O -1.710571 -6.426637 3.301533  
O -0.946905 -10.636317 2.776724  
O -3.849506 -9.616552 2.966281  
O 3.285258 -7.007981 -0.359327  
O -1.270661 -1.749965 1.293975  
O -0.155173 -5.467439 -2.029622  
O -3.743355 -9.019029 -2.343464

**B13**

75

N 0.156696 5.270483 0.982619  
H 0.173535 6.300054 0.999750  
C 0.104938 4.657167 2.230601  
C 0.259944 4.670120 -0.299573  
O 0.355163 5.370364 -1.324301  
O 0.040217 5.270064 3.307514  
N 0.135891 3.262721 2.147397  
C 0.212889 3.197426 -0.258382  
H -0.059856 2.755719 3.022125  
C 0.113400 2.556730 0.961380  
C -0.108057 1.067231 1.072286  
O -0.645093 0.585204 2.118122  
H -1.063924 -0.846760 1.682615  
O 0.252383 0.363371 0.017872  
H 0.224109 2.629286 -1.207650  
O -0.631722 -4.124838 -4.080854  
O -4.770718 -6.418704 2.848291  
O 3.063370 -4.861798 1.684290  
O 2.062149 -8.685915 1.293303  
Ti -1.320340 -3.659616 1.397309  
Ti -3.079107 -5.779783 2.279338  
Ti -4.794301 -8.151857 2.144376  
O 4.053291 -7.759844 2.630086  
O 1.122021 -8.484460 -1.254090  
Ti -0.608492 -3.625425 -2.268502  
Ti 1.706858 -4.048310 0.687226  
O -0.030648 -1.821505 -2.060438  
O -1.712800 -7.818620 -1.103028  
Ti -3.718247 -8.391740 -0.568779  
Ti -2.205863 -9.424234 2.067073  
Ti 3.506725 -9.499154 2.212704  
Ti -0.113832 -6.430517 2.141439  
Ti -0.211695 -8.488571 -5.302113  
Ti 2.998402 -8.937265 -0.565893  
Ti 0.304602 -1.596647 -0.270915  
Ti 2.794389 -6.697393 1.716787  
Ti -0.610042 -9.428183 -0.624211  
Ti 0.623887 -10.004176 2.075473  
Ti 1.807650 -8.572939 -3.186288  
Ti -2.301476 -5.895155 -1.321583  
Ti 1.718034 -6.207160 -1.343801  
Ti -2.098430 -8.674982 -3.076208

Ti -0.699570 -5.965172 -4.000944  
O -2.824647 -3.924223 2.442435  
O 4.149093 -9.958315 0.554679  
O 1.043340 -6.143432 0.545112  
O -3.956466 -6.513172 -0.956771  
O -1.057103 -10.087363 -2.231633  
O 0.161770 -4.326425 2.236965  
O -0.523647 -8.376221 1.608269  
O 2.278423 -6.810334 -3.067155  
O 2.187923 -10.565700 2.991835  
O 1.385926 -6.757385 3.064175  
O -1.839381 -5.466277 0.667360  
O 3.255193 -9.402109 -2.337763  
O -2.344847 -6.534140 -3.322158  
O -5.287423 -8.698276 0.439053  
O -0.402337 -6.709862 -5.725315  
O -0.148068 -7.905448 -3.489494  
O 2.304257 -4.520109 -1.077339  
O -2.419083 -9.926984 0.281600  
O 0.427445 -10.673776 0.385227  
O -3.131737 -7.664059 1.365928  
O 1.474958 -9.195849 -4.949901  
O 1.870672 -2.176747 0.513168  
O -0.137243 -3.579138 -0.251031  
O -1.869865 -9.214481 -4.866443  
O -2.326853 -4.049162 -1.801287  
O -1.659540 -6.377444 3.264713  
O -0.980691 -10.559313 2.862677  
O -3.867005 -9.501844 2.984784  
O 3.328664 -7.114288 -0.343814  
O -1.159539 -1.710539 1.103351  
O -0.109027 -5.595027 -2.048637  
O -3.748610 -9.033639 -2.314548

**B6(1)**

81

N 0.047729 5.040077 1.201629  
C 0.162177 4.344807 2.340839  
C -0.066989 4.393867 0.022551  
H -0.187637 5.016704 -0.886617  
C 0.167495 2.917539 2.337448  
C -0.030121 2.990785 -0.121818  
O 0.260960 2.192349 3.497116  
H 0.250731 2.852995 4.232450  
C 0.106359 2.224693 1.087786  
C 0.191880 0.782309 1.088575  
H 0.119681 0.243412 2.072585  
O 0.343234 0.134608 0.007149  
C 0.315760 5.094993 3.647273  
H 1.389600 5.186022 3.943043  
H -0.101213 6.116983 3.545637  
H -0.222702 4.596388 4.492263  
C -0.160622 2.361493 -1.492572  
H -0.904852 1.521545 -1.458605  
H 0.814940 1.881894 -1.772474

O -0.545742 3.373658 -2.444623  
H -0.542615 2.916862 -3.318193  
O -0.662838 -4.260449 -4.075981  
O -4.791996 -6.738679 2.770697  
O 3.075262 -5.172155 1.731912  
O 2.061956 -8.968031 1.194053  
Ti -1.370186 -3.921605 1.361332  
Ti -3.087271 -6.085364 2.229476  
Ti -4.796662 -8.457065 2.050443  
O 4.056037 -8.085418 2.564899  
O 1.132343 -8.738518 -1.345333  
Ti -0.617467 -3.822526 -2.241796  
Ti 1.704873 -4.326807 0.774006  
O -0.157691 -2.018340 -1.946970  
O -1.701999 -8.061907 -1.191192  
Ti -3.714962 -8.666562 -0.659884  
Ti -2.203958 -9.707008 1.956573  
Ti 3.501343 -9.802366 2.098253  
Ti -0.126483 -6.705144 2.083623  
Ti -0.197673 -8.582101 -5.384258  
Ti 3.002474 -9.173513 -0.666945  
Ti 0.207814 -1.959240 -0.109228  
Ti 2.789388 -6.997652 1.684406  
Ti -0.603240 -9.678406 -0.746095  
Ti 0.617936 -10.281264 1.954840  
Ti 1.819829 -8.730437 -3.272528  
Ti -2.303643 -6.149680 -1.336965  
Ti 1.789833 -6.378824 -1.368231  
Ti -2.092963 -8.853751 -3.175939  
Ti -0.695535 -6.100151 -4.018465  
O -2.866946 -4.236437 2.415816  
O 4.145761 -10.232373 0.430885  
O 1.061109 -6.405525 0.500583  
O -3.959181 -6.775690 -1.002172  
O -1.058832 -10.302581 -2.364898  
O 0.134788 -4.628260 2.223169  
O -0.530353 -8.654954 1.501872  
O 2.333903 -6.988315 -3.098248  
O 2.177566 -10.864070 2.873493  
O 1.364264 -7.095114 3.004768  
O -1.844476 -5.767593 0.634186  
O 3.270971 -9.590233 -2.448267  
O -2.339591 -6.711955 -3.363867  
O -5.287804 -8.984660 0.333522  
O -0.367551 -6.794646 -5.766952  
O -0.137602 -8.065932 -3.560881  
O 2.373996 -4.718298 -1.015585  
O -2.418996 -10.195160 0.163959  
O 0.413073 -10.944985 0.264607  
O -3.137563 -7.956644 1.281535  
O 1.495260 -9.290479 -5.062703  
O 1.797059 -2.454083 0.751336  
O -0.073580 -3.909094 -0.254834  
O -1.862759 -9.324605 -4.983754

O -2.319160 -4.288619 -1.738333  
O -1.671042 -6.693910 3.210180  
O -0.980386 -10.843841 2.752404  
O -3.864296 -9.806641 2.884216  
O 3.348612 -7.356734 -0.381729  
O -1.184618 -2.050408 1.109778  
O -0.043859 -5.789538 -2.116645  
O -3.739608 -9.262597 -2.424728

**B6(2)**

84

N 0.253568 3.899553 1.921963  
C 0.345701 5.051511 1.223131  
C 0.414881 2.753546 1.236090  
H 0.362465 1.821010 1.836963  
C 0.611407 5.074313 -0.182279  
C 0.654527 2.667615 -0.162765  
O 0.745564 6.268059 -0.875829  
H 0.651280 6.986347 -0.206901  
C 0.761638 3.868025 -0.918626  
C 1.050126 3.915326 -2.419122  
H 1.169491 2.879120 -2.809512  
H 2.033746 4.421759 -2.573574  
N 0.051920 4.606771 -3.273874  
H -0.860122 4.147118 -3.113395  
H -0.078013 5.553397 -2.879429  
C 0.159313 6.357575 1.968903  
H 0.857042 7.155263 1.610751  
H 0.352848 6.204558 3.050277  
H -0.880693 6.750874 1.856266  
C 0.813161 1.304460 -0.807179  
H 0.334152 1.254271 -1.814634  
H 1.885420 1.012472 -0.917763  
O 0.232998 0.269694 0.053530  
H -0.569912 0.634054 0.499278  
O -0.664779 -4.132279 -4.087436  
O -4.783418 -6.620830 2.758711  
O 3.083392 -5.092968 1.707307  
O 2.059326 -8.882862 1.147540  
Ti -1.360368 -3.814650 1.344692  
Ti -3.081413 -5.972607 2.206362  
Ti -4.798039 -8.335102 2.027067  
O 4.052028 -8.022119 2.526158  
O 1.130691 -8.641968 -1.387439  
Ti -0.612058 -3.700293 -2.256205  
Ti 1.722129 -4.231697 0.745328  
O -0.136919 -1.897409 -1.949271  
O -1.699831 -7.946930 -1.211730  
Ti -3.715674 -8.546265 -0.682815  
Ti -2.207402 -9.592263 1.938368  
Ti 3.498541 -9.732272 2.037231  
Ti -0.119518 -6.599967 2.055627  
Ti -0.202933 -8.456194 -5.420571  
Ti 3.001324 -9.078233 -0.715406  
Ti 0.223473 -1.856996 -0.109801

Ti 2.792868 -6.916655 1.646810  
Ti -0.607666 -9.564695 -0.771832  
Ti 0.608943 -10.186916 1.925440  
Ti 1.819993 -8.624540 -3.315611  
Ti -2.302637 -6.030790 -1.364888  
Ti 1.790041 -6.281509 -1.400297  
Ti -2.091553 -8.744864 -3.202419  
Ti -0.694127 -5.978301 -4.036674  
O -2.865279 -4.121936 2.381673  
O 4.142920 -10.149140 0.366005  
O 1.067323 -6.309424 0.470952  
O -3.957279 -6.654509 -1.022329  
O -1.064944 -10.192147 -2.391902  
O 0.147738 -4.527321 2.195932  
O -0.529636 -8.549429 1.476872  
O 2.330646 -6.882081 -3.135577  
O 2.174733 -10.805449 2.805585  
O 1.373120 -7.002015 2.971078  
O -1.833773 -5.655749 0.608952  
O 3.269511 -9.489211 -2.497600  
O -2.336347 -6.591994 -3.382239  
O -5.287307 -8.868062 0.306824  
O -0.367472 -6.665435 -5.786122  
O -0.138984 -7.952471 -3.591125  
O 2.378237 -4.621749 -1.048218  
O -2.428111 -10.076422 0.146760  
O 0.380697 -10.847675 0.239572  
O -3.139068 -7.838325 1.257468  
O 1.485093 -9.178730 -5.105313  
O 1.836019 -2.358556 0.690336  
O -0.062001 -3.794600 -0.268965  
O -1.868651 -9.196143 -5.019565  
O -2.311578 -4.165071 -1.744817  
O -1.665071 -6.585701 3.184216  
O -0.988407 -10.734725 2.734873  
O -3.870147 -9.685859 2.864470  
O 3.349946 -7.263962 -0.425527  
O -1.172252 -1.936066 1.097791  
O -0.043533 -5.672101 -2.134319  
O -3.738616 -9.142673 -2.447411

**K3**

81

C 0.145612 1.593582 0.032354  
H 0.123173 1.763092 2.233455  
C 0.040427 4.511524 0.017817  
C 0.071966 2.306912 -1.260716  
C 0.103649 2.353522 1.291860  
C 0.035089 3.736937 -1.268861  
C 0.045762 3.730297 1.316357  
C 0.041382 1.573212 -2.476868  
C -0.015377 4.423985 -2.503478  
H 0.048463 0.459028 -2.444613  
H -0.038461 5.534771 -2.492190  
C -0.017355 2.273783 -3.704603

C -0.039454 3.692889 -3.717910  
C -0.001875 4.521907 2.587030  
H -0.004991 3.862018 3.478886  
H 0.867428 5.219465 2.640380  
H -0.906044 5.175843 2.601486  
O 0.247556 0.326362 0.076151  
O 0.035488 5.759327 0.044244  
H -0.046266 1.704651 -4.658170  
H -0.080925 4.237621 -4.685144  
O -0.853268 -4.098861 -4.064375  
O -4.862045 -6.702858 2.751702  
O 2.960710 -4.928862 1.732777  
O 2.039158 -8.756538 1.195642  
Ti -1.503139 -3.792854 1.321491  
Ti -3.184964 -5.993328 2.188372  
Ti -4.808706 -8.422025 2.038157  
O 4.001520 -7.805276 2.563658  
O 1.120423 -8.568662 -1.355728  
Ti -0.802662 -3.641546 -2.233772  
Ti 1.585438 -4.098175 0.767915  
O -0.406594 -1.815969 -1.929036  
O -1.734798 -7.949041 -1.196050  
Ti -3.724982 -8.608093 -0.669612  
Ti -2.197867 -9.613098 1.952263  
Ti 3.502699 -9.538928 2.099917  
Ti -0.222274 -6.532882 2.064047  
Ti -0.201627 -8.407015 -5.380302  
Ti 2.999509 -8.929973 -0.669917  
Ti 0.008277 -1.726950 -0.080729  
Ti 2.699056 -6.756193 1.685452  
Ti -0.594798 -9.532758 -0.742922  
Ti 0.639098 -10.107870 1.964141  
Ti 1.820425 -8.499539 -3.273525  
Ti -2.394991 -6.047839 -1.349032  
Ti 1.696271 -6.154789 -1.363095  
Ti -2.093235 -8.757248 -3.179505  
Ti -0.790276 -5.940348 -4.013181  
O -3.039318 -4.140530 2.322245  
O 4.162941 -9.957069 0.435781  
O 0.973701 -6.208055 0.493836  
O -4.029471 -6.718353 -0.995054  
O -1.036130 -10.171150 -2.363469  
O 0.003289 -4.443233 2.207798  
O -0.554528 -8.509066 1.507851  
O 2.258897 -6.737955 -3.095503  
O 2.218753 -10.655518 2.872742  
O 1.276218 -6.883136 2.994186  
O -1.898194 -5.676129 0.610642  
O 3.302683 -9.310802 -2.453563  
O -2.409279 -6.614650 -3.362128  
O -5.278647 -8.992078 0.325986  
O -0.440785 -6.624724 -5.760429  
O -0.161430 -7.896760 -3.558311  
O 2.264165 -4.490220 -1.015018

O -2.395145 -10.098905 0.156850  
O 0.443643 -10.775368 0.273517  
O -3.164349 -7.881543 1.274320  
O 1.515041 -9.064632 -5.063997  
O 1.623692 -2.235816 0.747273  
O -0.201315 -3.704811 -0.269041  
O -1.840870 -9.214717 -4.989489  
O -2.474489 -4.177714 -1.715370  
O -1.760599 -6.532585 3.195924  
O -0.949160 -10.712030 2.757038  
O -3.852356 -9.746197 2.883736  
O 3.276480 -7.107599 -0.380268  
O -1.388537 -1.913356 1.098973  
O -0.148912 -5.598498 -2.117505  
O -3.736177 -9.198151 -2.435586  
C  
80  
O -0.659887 2.466596 -0.359461  
C -0.354345 1.395878 0.459625  
C -1.212247 3.548600 0.471188  
C -1.204081 2.981826 1.876393  
C -0.691047 1.697760 1.851914  
O 0.164676 0.371823 -0.044303  
O -1.648553 3.606710 3.003218  
O -0.451328 0.789728 2.843516  
H -2.241056 3.755820 0.083100  
C -0.310054 4.784837 0.246438  
H -0.749965 1.202879 3.693100  
H -1.718155 4.575119 2.818118  
H 0.706068 4.558231 0.663574  
C -0.875949 6.056034 0.900056  
O -0.245562 5.095197 -1.159850  
H -1.011481 5.913409 2.003356  
H -1.886003 6.268146 0.454069  
O 0.021277 7.157319 0.754211  
H 0.241321 7.165485 -0.212306  
H 0.249130 4.354058 -1.589165  
O -0.845703 -4.050790 -4.017574  
O -4.871197 -6.713035 2.754631  
O 2.953622 -4.948925 1.770157  
O 2.043656 -8.759287 1.147621  
Ti -1.518412 -3.795171 1.385936  
Ti -3.181930 -6.010728 2.216927  
Ti -4.828452 -8.415370 2.007703  
O 4.006974 -7.856388 2.540047  
O 1.127213 -8.543736 -1.387208  
Ti -0.800731 -3.619959 -2.180536  
Ti 1.572113 -4.102707 0.819802  
O -0.382605 -1.821249 -1.853340  
O -1.744164 -7.925450 -1.210480  
Ti -3.752090 -8.588727 -0.698556  
Ti -2.207149 -9.595902 1.925329  
Ti 3.504249 -9.576106 2.027370  
Ti -0.213293 -6.545526 2.095179



Ti -0.201317 -8.331735 -5.402529  
Ti 3.005792 -8.891871 -0.719151  
Ti 0.001835 -1.738462 -0.013655  
Ti 2.703737 -6.778503 1.691112  
Ti -0.602419 -9.502326 -0.771153  
Ti 0.631120 -10.098936 1.918024  
Ti 1.831495 -8.416065 -3.305174  
Ti -2.400979 -6.017854 -1.328193  
Ti 1.694814 -6.110518 -1.340337  
Ti -2.091229 -8.714051 -3.200931  
Ti -0.779790 -5.890078 -3.989039  
O -3.039886 -4.160374 2.397988  
O 4.157451 -9.963606 0.349422  
O 0.971410 -6.204952 0.521896  
O -4.041417 -6.695807 -1.017355  
O -1.047257 -10.140724 -2.391818  
O -0.006662 -4.469981 2.258334  
O -0.558114 -8.498525 1.463139  
O 2.248044 -6.653882 -3.091218  
O 2.215237 -10.667319 2.814554  
O 1.284533 -6.936524 3.010558  
O -1.925156 -5.658581 0.643925  
O 3.325007 -9.229273 -2.508464  
O -2.401256 -6.561152 -3.352943  
O -5.316065 -8.953293 0.285878  
O -0.441910 -6.548323 -5.750094  
O -0.160969 -7.857228 -3.566394  
O 2.252273 -4.447800 -0.971406  
O -2.413390 -10.078206 0.132847  
O 0.422704 -10.765843 0.234821  
O -3.186392 -7.869216 1.246808  
O 1.531533 -8.956794 -5.104908  
O 1.605625 -2.240708 0.830793  
O -0.218945 -3.713414 -0.203021  
O -1.840458 -9.146745 -5.018816  
O -2.481891 -4.147513 -1.670799  
O -1.762156 -6.587047 3.215061  
O -0.952842 -10.693942 2.727410  
O -3.868072 -9.743620 2.846363  
O 3.274677 -7.068225 -0.383581  
O -1.413342 -1.913870 1.156648  
O -0.156469 -5.575009 -2.075218  
O -3.741704 -9.158354 -2.467582

#### **Aminoacid/hormones**

##### **DMG**

76

H 1.258628 4.478666 1.325172  
H -0.276520 5.007585 0.512980  
C 0.650584 4.372781 0.398613  
H 1.228855 4.780551 -0.459714  
H 0.168647 2.685166 2.241370  
H -1.417982 2.830274 1.408735  
N 0.345896 2.959309 0.153329  
C -0.371072 2.417248 1.297177

C -0.493069 0.899041 1.250245  
O -1.368175 0.349677 2.041171  
H -1.343137 -0.765653 1.786187  
O 0.252320 0.224459 0.441688  
C -0.483188 2.841179 -1.054533  
H -1.480854 3.348836 -0.921773  
H 0.037253 3.323389 -1.910124  
H -0.660310 1.772135 -1.308343  
O -0.659957 -3.993797 -3.962788  
O -4.767751 -6.644177 2.808088  
O 3.113623 -5.130077 1.766135  
O 2.060461 -8.906095 1.151253  
Ti -1.305714 -3.842025 1.492480  
Ti -3.053773 -5.998801 2.290263  
Ti -4.800265 -8.330562 2.018003  
O 4.053774 -8.080180 2.545695  
O 1.125715 -8.554400 -1.366379  
Ti -0.593437 -3.620963 -2.119347  
Ti 1.773261 -4.228100 0.806986  
O -0.044775 -1.826615 -1.794534  
O -1.708590 -7.866768 -1.203318  
Ti -3.727281 -8.483641 -0.696083  
Ti -2.220621 -9.597815 1.899694  
Ti 3.496909 -9.782753 2.027144  
Ti -0.105734 -6.632064 2.110059  
Ti -0.201796 -8.289216 -5.418849  
Ti 2.996756 -9.070171 -0.710300  
Ti 0.317770 -1.765933 0.011003  
Ti 2.799918 -6.949009 1.696451  
Ti -0.624077 -9.501122 -0.790998  
Ti 0.602765 -10.212634 1.875625  
Ti 1.808064 -8.539730 -3.303758  
Ti -2.301929 -5.950971 -1.302289  
Ti 1.789230 -6.278320 -1.332548  
Ti -2.089455 -8.613642 -3.213294  
Ti -0.691501 -5.835579 -3.982920  
O -2.801654 -4.162193 2.543331  
O 4.135901 -10.166827 0.346017  
O 1.076485 -6.308486 0.537583  
O -3.958034 -6.572958 -0.978935  
O -1.061841 -10.073840 -2.438230  
O 0.185368 -4.567400 2.313114  
O -0.530649 -8.556654 1.457262  
O 2.344603 -6.812569 -3.079900  
O 2.157974 -10.854434 2.764604  
O 1.381232 -7.061184 3.020350  
O -1.818743 -5.635540 0.694971  
O 3.241247 -9.448607 -2.503016  
O -2.334380 -6.460200 -3.336968  
O -5.292784 -8.835214 0.286704  
O -0.362366 -6.484585 -5.742777  
O -0.138481 -7.824116 -3.576813  
O 2.412537 -4.626093 -0.960885  
O -2.440996 -10.037234 0.092386

O 0.374244 -10.820120 0.166768  
O -3.140232 -7.824933 1.260069  
O 1.473216 -9.042291 -5.109036  
O 1.912400 -2.355090 0.764378  
O -0.041368 -3.740639 -0.134744  
O -1.865550 -9.036965 -5.037108  
O -2.298273 -4.071426 -1.638817  
O -1.648012 -6.664508 3.244489  
O -1.007759 -10.766567 2.658544  
O -3.875966 -9.695069 2.834631  
O 3.357298 -7.264621 -0.379710  
O -1.160156 -1.949655 1.271289  
O -0.036769 -5.588690 -2.058836  
O -3.741365 -9.031270 -2.471111

### Cytosine

73

C -0.913885 2.235416 2.586674  
N -1.053286 2.207039 3.944458  
H -1.596393 2.952309 4.386208  
H -1.123588 1.276654 4.375330  
C -1.113893 3.490096 1.891878  
H -1.438427 4.403553 2.426987  
N -0.540940 1.089309 1.970813  
C -0.867991 3.493870 0.530139  
C -0.276433 1.152038 0.651197  
H -0.986597 4.392804 -0.108677  
N -0.452538 2.336444 -0.059805  
H -0.249913 2.273586 -1.065979  
O 0.163414 0.176748 -0.059850  
O -0.850680 -4.233147 -4.030074  
O -4.855074 -6.816977 2.836073  
O 2.961320 -5.030245 1.753724  
O 2.045662 -8.855857 1.210304  
Ti -1.506851 -3.904142 1.385973  
Ti -3.173125 -6.107493 2.281935  
Ti -4.807043 -8.529667 2.102364  
O 4.023229 -7.911465 2.563506  
O 1.127989 -8.685645 -1.346766  
Ti -0.806976 -3.778647 -2.193156  
Ti 1.569560 -4.210523 0.796423  
O -0.430151 -1.969006 -1.897968  
O -1.729010 -8.060607 -1.146469  
Ti -3.719120 -8.723388 -0.606108  
Ti -2.185678 -9.705848 2.017320  
Ti 3.512984 -9.642197 2.094728  
Ti -0.205714 -6.648644 2.111983  
Ti -0.211746 -8.530974 -5.370371  
Ti 3.001876 -9.026693 -0.677512  
Ti -0.002478 -1.859634 -0.062952  
Ti 2.707510 -6.859072 1.702888  
Ti -0.593152 -9.640570 -0.701339  
Ti 0.654913 -10.205478 1.999692  
Ti 1.823610 -8.590715 -3.278658  
Ti -2.397305 -6.158809 -1.296584

Ti 1.693089 -6.268329 -1.331880  
 Ti -2.095215 -8.871353 -3.138919  
 Ti -0.791521 -6.070720 -3.978596  
 O -3.012189 -4.259452 2.437831  
 O 4.160233 -10.063686 0.424007  
 O 0.973436 -6.333349 0.531416  
 O -4.030093 -6.842929 -0.956637  
 O -1.037518 -10.284268 -2.318905  
 O 0.010793 -4.568923 2.250179  
 O -0.543707 -8.610806 1.546495  
 O 2.244925 -6.830639 -3.082322  
 O 2.242586 -10.758342 2.889232  
 O 1.301491 -6.982454 3.036285  
 O -1.937277 -5.772554 0.672132  
 O 3.322863 -9.381149 -2.459511  
 O -2.410051 -6.743511 -3.323534  
 O -5.275174 -9.103266 0.386396  
 O -0.455606 -6.751319 -5.736355  
 O -0.160781 -8.027881 -3.539565  
 O 2.245542 -4.597858 -0.993104  
 O -2.380659 -10.205869 0.227451  
 O 0.444561 -10.884430 0.319535  
 O -3.166214 -7.984570 1.334619  
 O 1.523396 -9.149329 -5.070911  
 O 1.622706 -2.353921 0.755444  
 O -0.222499 -3.852652 -0.223120  
 O -1.849711 -9.334632 -4.952603  
 O -2.489343 -4.296297 -1.678630  
 O -1.738692 -6.669327 3.260009  
 O -0.929662 -10.796164 2.820609  
 O -3.845497 -9.847714 2.949147  
 O 3.276226 -7.200619 -0.368448  
 O -1.390243 -2.030073 1.145382  
 O -0.163536 -5.737004 -2.070824  
 O -3.726341 -9.322415 -2.369437

### Histamine

77

N 0.133956 1.079879 -0.473704  
 C 0.512628 2.347654 -0.837690  
 H 0.763949 2.647124 -1.864815  
 C -0.206819 1.120298 0.869470  
 H -0.695197 0.281584 1.410148  
 C 0.381820 3.128254 0.326141  
 C 0.518476 4.628580 0.384539  
 C -0.434289 5.327659 -0.614855  
 H -0.464265 6.425598 -0.379456  
 H -1.468454 4.929715 -0.461444  
 N -0.045594 5.033465 -2.021871  
 H 0.868075 5.490917 -2.182034  
 H -0.687771 5.545382 -2.648672  
 N -0.044247 2.340793 1.393731  
 H -0.015353 0.278707 -1.109708  
 H 1.571493 4.938142 0.157618  
 H 0.294923 4.971718 1.422787

O -0.688592 -3.774958 -3.589033  
O -4.745850 -6.704927 3.071193  
O 3.145459 -5.164584 2.110464  
O 2.063405 -8.896072 1.308448  
Ti -1.300811 -3.839445 1.840493  
Ti -3.034938 -6.044603 2.556340  
Ti -4.793945 -8.367159 2.229717  
O 4.058208 -8.141137 2.739327  
O 1.127430 -8.450097 -1.205283  
Ti -0.602044 -3.456153 -1.743391  
Ti 1.807850 -4.238273 1.206477  
O -0.131098 -1.657938 -1.281998  
O -1.701019 -7.767181 -0.989360  
Ti -3.722208 -8.397823 -0.495602  
Ti -2.209801 -9.630022 2.032828  
Ti 3.499041 -9.815767 2.144550  
Ti -0.103773 -6.664262 2.350987  
Ti -0.207375 -8.007195 -5.230350  
Ti 2.997194 -8.982572 -0.568221  
Ti 0.309451 -1.812435 0.549425  
Ti 2.806096 -6.980547 1.933967  
Ti -0.608099 -9.413363 -0.654901  
Ti 0.606905 -10.233101 1.993875  
Ti 1.811649 -8.336541 -3.137239  
Ti -2.292833 -5.856730 -1.006630  
Ti 1.803846 -6.133888 -1.079506  
Ti -2.092954 -8.434207 -3.031132  
Ti -0.692499 -5.622348 -3.680928  
O -2.797326 -4.211760 2.858077  
O 4.133143 -10.125445 0.447849  
O 1.104737 -6.268085 0.796912  
O -3.949049 -6.475674 -0.692456  
O -1.065350 -9.920997 -2.320569  
O 0.193587 -4.615388 2.634902  
O -0.525290 -8.563157 1.632020  
O 2.339328 -6.611958 -2.850171  
O 2.161609 -10.910540 2.851033  
O 1.386425 -7.125715 3.245645  
O -1.768859 -5.633937 0.985987  
O 3.246621 -9.274146 -2.377104  
O -2.332231 -6.269362 -3.056112  
O -5.291327 -8.769984 0.475249  
O -0.368503 -6.189119 -5.469245  
O -0.140571 -7.622091 -3.369948  
O 2.444125 -4.518429 -0.602027  
O -2.437240 -9.987695 0.211715  
O 0.379969 -10.765123 0.258586  
O -3.129479 -7.831756 1.483081  
O 1.471440 -8.763753 -4.959263  
O 1.911851 -2.357468 1.306782  
O 0.017533 -3.687320 0.221349  
O -1.872005 -8.769335 -4.870124  
O -2.276201 -3.954990 -1.222778  
O -1.634112 -6.733123 3.495308

O -0.996652 -10.824793 2.754465  
O -3.867080 -9.777471 2.961258  
O 3.359606 -7.198167 -0.166092  
O -1.069194 -1.949390 1.744669  
O -0.021475 -5.434382 -1.764042  
O -3.744943 -8.861941 -2.297044

#### Uracil-Bind O

72

N -0.155108 2.136718 3.624876  
H -0.359487 2.564429 4.536740  
C 0.504261 2.282804 1.332340  
C -0.373330 0.744108 3.594546  
C 0.280231 0.855556 1.221451  
C 0.265452 2.881868 2.557765  
N -0.061528 0.159568 2.360899  
H -0.465040 -0.815988 2.165504  
H 0.390040 3.973228 2.719140  
O -0.797490 0.123477 4.574096  
H 0.824317 2.851788 0.439823  
O 0.379400 0.225067 0.102001  
O -0.809991 -4.223694 -4.005960  
O -4.785434 -6.723497 2.828131  
O 3.021371 -5.041784 1.741867  
O 2.079813 -8.862008 1.228601  
Ti -1.400543 -3.832579 1.400400  
Ti -3.097362 -6.050513 2.257841  
Ti -4.763474 -8.456389 2.148026  
O 4.067501 -7.936955 2.572764  
O 1.136066 -8.663486 -1.317902  
Ti -0.768047 -3.772988 -2.179758  
Ti 1.642204 -4.217464 0.784002  
O -0.283673 -1.954381 -1.944019  
O -1.710435 -8.043547 -1.114184  
Ti -3.718702 -8.678624 -0.573075  
Ti -2.156430 -9.685200 2.049781  
Ti 3.552497 -9.665513 2.104950  
Ti -0.159184 -6.619258 2.144215  
Ti -0.218632 -8.526609 -5.342720  
Ti 3.008569 -9.051754 -0.656999  
Ti 0.156223 -1.820820 -0.150167  
Ti 2.757315 -6.876872 1.720064  
Ti -0.576845 -9.622454 -0.667332  
Ti 0.681193 -10.196726 2.038148  
Ti 1.829895 -8.610193 -3.258575  
Ti -2.351775 -6.138024 -1.264777  
Ti 1.719055 -6.291421 -1.324213  
Ti -2.072596 -8.863019 -3.097628  
Ti -0.775011 -6.065642 -3.950198  
O -2.932632 -4.190126 2.384099  
O 4.164581 -10.108371 0.428310  
O 1.019314 -6.312185 0.554994  
O -3.993369 -6.793851 -0.903179  
O -1.018258 -10.278454 -2.277733  
O 0.091034 -4.519149 2.262955

O -0.505869 -8.584948 1.606947  
O 2.255362 -6.846206 -3.078253  
O 2.271207 -10.751513 2.918600  
O 1.353046 -6.985768 3.054062  
O -1.827799 -5.744765 0.689681  
O 3.310587 -9.418301 -2.444457  
O -2.389390 -6.718263 -3.285011  
O -5.274662 -9.009726 0.444520  
O -0.463197 -6.747508 -5.707696  
O -0.154093 -8.024025 -3.510638  
O 2.284620 -4.620626 -1.003657  
O -2.368886 -10.175513 0.258668  
O 0.462682 -10.862122 0.351880  
O -3.115477 -7.949601 1.359331  
O 1.507845 -9.174779 -5.045588  
O 1.748462 -2.348388 0.676120  
O -0.165531 -3.804670 -0.224019  
O -1.849811 -9.326223 -4.909886  
O -2.448535 -4.273435 -1.649147  
O -1.690497 -6.597654 3.284630  
O -0.900750 -10.785785 2.850651  
O -3.810252 -9.792797 2.988589  
O 3.308053 -7.228098 -0.366348  
O -1.181901 -1.937735 1.193772  
O -0.145998 -5.731791 -2.041721  
O -3.718016 -9.282078 -2.334524

#### Uracil-Bind N

71

N -0.051190 2.349292 1.207107  
H -0.001349 2.771457 2.141744  
C -0.277025 2.490549 -1.178334  
C 0.108465 0.971950 1.161098  
C -0.172175 1.022628 -1.254131  
C -0.215359 3.095564 0.062044  
N 0.051379 0.356975 -0.064542  
H -0.304570 4.195177 0.183349  
O 0.287818 0.259547 2.185397  
H -0.415262 3.067645 -2.112635  
O -0.274002 0.407067 -2.364083  
O -0.803869 -4.005189 -3.882642  
O -4.882860 -6.919894 2.770712  
O 2.961602 -5.089636 1.855345  
O 2.050346 -8.877189 1.164192  
Ti -1.529961 -3.928056 1.516317  
Ti -3.203286 -6.187386 2.249650  
Ti -4.828671 -8.613297 1.998157  
O 4.004109 -7.984382 2.576459  
O 1.125441 -8.568305 -1.376453  
Ti -0.781922 -3.660175 -2.036193  
Ti 1.567434 -4.236593 0.942403  
O -0.277365 -1.859277 -1.535973  
O -1.725044 -7.982281 -1.200253  
Ti -3.731966 -8.674867 -0.704090  
Ti -2.189161 -9.766242 1.879155

Ti 3.522032 -9.698828 2.039468  
Ti -0.240756 -6.712843 2.120812  
Ti -0.175399 -8.268501 -5.402597  
Ti 3.001228 -8.969430 -0.698086  
Ti 0.044978 -1.723667 0.364087  
Ti 2.690027 -6.910672 1.739689  
Ti -0.580059 -9.583369 -0.796633  
Ti 0.661897 -10.256300 1.868376  
Ti 1.838635 -8.448391 -3.293361  
Ti -2.387259 -6.091863 -1.285165  
Ti 1.715955 -6.178892 -1.292783  
Ti -2.064119 -8.710192 -3.213428  
Ti -0.764434 -5.857220 -3.935332  
O -3.073422 -4.346470 2.478853  
O 4.173592 -10.038444 0.355962  
O 0.977510 -6.305895 0.568882  
O -4.026221 -6.778245 -0.981557  
O -0.999796 -10.145101 -2.456262  
O -0.024592 -4.651303 2.358633  
O -0.551476 -8.651904 1.434385  
O 2.265596 -6.688681 -3.051727  
O 2.235878 -10.837871 2.767260  
O 1.261693 -7.106514 3.034502  
O -1.921167 -5.780221 0.693093  
O 3.311697 -9.286228 -2.492951  
O -2.382488 -6.555513 -3.318632  
O -5.298028 -9.093880 0.258666  
O -0.401317 -6.467942 -5.702341  
O -0.144861 -7.828106 -3.556659  
O 2.245612 -4.517684 -0.865897  
O -2.378376 -10.200576 0.067535  
O 0.469478 -10.865238 0.157289  
O -3.184447 -8.032524 1.247380  
O 1.529793 -8.955882 -5.099057  
O 1.622699 -2.375211 1.095101  
O -0.222348 -3.758514 -0.057220  
O -1.815776 -9.083149 -5.046494  
O -2.461653 -4.197826 -1.584358  
O -1.785878 -6.798441 3.232459  
O -0.922751 -10.869388 2.657190  
O -3.847973 -9.950532 2.794279  
O 3.289294 -7.155698 -0.351138  
O -1.414321 -2.052261 1.429486  
O -0.152863 -5.596747 -2.000900  
O -3.708480 -9.191166 -2.490812

**Thymine**

75

C -0.832969 2.131879 2.842619  
O -0.994162 1.901002 4.049207  
C -0.988664 3.450665 2.183289  
C -1.388936 4.620685 3.037901  
H -2.477209 4.572641 3.284544  
H -1.190453 5.586296 2.523345  
H -0.843483 4.596133 4.008872



N -0.454398 1.077959 1.948870  
H -0.411559 0.114637 2.329047  
C -0.792244 3.539300 0.822294  
C -0.249030 1.190685 0.603644  
H -0.913374 4.496135 0.278027  
N -0.446276 2.432225 0.061032  
H -0.269070 2.500432 -0.947668  
O 0.123916 0.231649 -0.150097  
O -0.841672 -4.250024 -4.045098  
O -4.841359 -6.777772 2.833082  
O 2.963754 -5.025780 1.742784  
O 2.046501 -8.857923 1.213293  
Ti -1.488665 -3.873121 1.397888  
Ti -3.156076 -6.082152 2.284242  
Ti -4.803985 -8.497793 2.107088  
O 4.022353 -7.909903 2.562348  
O 1.121211 -8.691771 -1.338935  
Ti -0.794870 -3.785711 -2.215300  
Ti 1.581194 -4.212490 0.782462  
O -0.367019 -1.980171 -1.940565  
O -1.729319 -8.051010 -1.142284  
Ti -3.721173 -8.703397 -0.602470  
Ti -2.190867 -9.693066 2.021119  
Ti 3.513067 -9.645348 2.102048  
Ti -0.201878 -6.644333 2.107765  
Ti -0.218166 -8.556405 -5.365121  
Ti 2.998904 -9.047631 -0.667748  
Ti 0.024310 -1.860177 -0.104777  
Ti 2.710335 -6.861287 1.698791  
Ti -0.597919 -9.639008 -0.696568  
Ti 0.650839 -10.204751 2.002851  
Ti 1.812987 -8.630700 -3.269907  
Ti -2.392680 -6.149299 -1.300226  
Ti 1.696513 -6.280725 -1.347975  
Ti -2.099343 -8.870332 -3.132832  
Ti -0.784071 -6.086075 -3.986849  
O -2.977044 -4.228593 2.452660  
O 4.161093 -10.074672 0.435114  
O 0.978186 -6.323357 0.525037  
O -4.026090 -6.822311 -0.957268  
O -1.046072 -10.286087 -2.309693  
O 0.027732 -4.554755 2.243805  
O -0.541301 -8.604036 1.546572  
O 2.244622 -6.864699 -3.086682  
O 2.239374 -10.756630 2.893789  
O 1.306296 -6.977928 3.030671  
O -1.932194 -5.740410 0.674479  
O 3.302081 -9.430199 -2.449151  
O -2.404615 -6.746724 -3.324584  
O -5.287099 -9.042273 0.392185  
O -0.447606 -6.773434 -5.737451  
O -0.163307 -8.042438 -3.536608  
O 2.244362 -4.603998 -1.007113  
O -2.394384 -10.188812 0.231433

O 0.439616 -10.883592 0.323121  
O -3.158338 -7.964571 1.340050  
O 1.499695 -9.213229 -5.053115  
O 1.631697 -2.336409 0.735048  
O -0.228132 -3.830494 -0.231078  
O -1.860576 -9.341604 -4.944562  
O -2.479983 -4.292056 -1.706884  
O -1.726721 -6.659095 3.260621  
O -0.935161 -10.787666 2.821832  
O -3.850893 -9.830755 2.946026  
O 3.274162 -7.219076 -0.373447  
O -1.327552 -1.981968 1.165110  
O -0.156938 -5.739408 -2.075416  
O -3.733267 -9.309628 -2.360931

#### Adenine

75

N -0.051772 2.240191 1.199611  
C -0.017028 2.318412 -1.233948  
C -0.002011 0.912208 1.095960  
C 0.037862 0.901401 -1.179963  
C -0.018773 1.611103 -3.255716  
H -0.039297 1.558343 -4.359140  
C -0.052672 2.970902 0.038861  
N 0.053512 0.162330 -0.042479  
N -0.052555 4.323074 0.155840  
H -0.314763 4.712670 1.066958  
H -0.285532 4.871983 -0.677494  
H -0.018558 0.334024 2.048707  
N -0.051202 2.749813 -2.559370  
N 0.050777 0.468316 -2.473894  
H -0.046632 -0.569788 -2.645145  
O -0.808992 -4.218468 -3.968684  
O -4.830123 -6.977656 2.791491  
O 2.999448 -5.159990 1.821005  
O 2.066479 -8.965201 1.193717  
Ti -1.470148 -4.034627 1.463238  
Ti -3.144166 -6.259820 2.259028  
Ti -4.784887 -8.678073 2.043744  
O 4.049487 -8.078656 2.567944  
O 1.127154 -8.682818 -1.365799  
Ti -0.779662 -3.829024 -2.132524  
Ti 1.607582 -4.336251 0.886628  
O -0.298022 -2.029304 -1.833945  
O -1.720952 -8.121202 -1.188612  
Ti -3.723008 -8.788539 -0.678663  
Ti -2.163365 -9.847984 1.932673  
Ti 3.533213 -9.799180 2.048159  
Ti -0.171538 -6.794263 2.140035  
Ti -0.183259 -8.485297 -5.401154  
Ti 2.996323 -9.096327 -0.690246  
Ti 0.046263 -1.979188 0.073438  
Ti 2.755695 -6.995915 1.729941  
Ti -0.576760 -9.704807 -0.773823  
Ti 0.674604 -10.345328 1.922132

Ti 1.842044 -8.584768 -3.295026  
Ti -2.378478 -6.215756 -1.290092  
Ti 1.716483 -6.316155 -1.308384  
Ti -2.064744 -8.890373 -3.193892  
Ti -0.769720 -6.065518 -3.954926  
O -2.991295 -4.413106 2.466317  
O 4.160383 -10.175304 0.364305  
O 1.013888 -6.413626 0.567137  
O -4.017140 -6.897843 -0.972021  
O -1.003048 -10.318741 -2.406709  
O 0.042397 -4.716530 2.315542  
O -0.517620 -8.734664 1.519382  
O 2.263180 -6.823891 -3.072061  
O 2.256840 -10.928989 2.800635  
O 1.336337 -7.141192 3.053608  
O -1.893782 -5.883188 0.683635  
O 3.312196 -9.414726 -2.482246  
O -2.385812 -6.737423 -3.319579  
O -5.273862 -9.186936 0.313575  
O -0.435051 -6.698078 -5.723286  
O -0.146144 -8.025504 -3.557378  
O 2.270052 -4.654247 -0.914254  
O -2.361884 -10.299717 0.128901  
O 0.481326 -10.956651 0.210437  
O -3.143527 -8.119283 1.282500  
O 1.545435 -9.110017 -5.098367  
O 1.632584 -2.455366 0.907126  
O -0.201633 -3.935004 -0.155322  
O -1.820956 -9.301362 -5.014840  
O -2.464777 -4.340415 -1.633604  
O -1.723000 -6.834435 3.252282  
O -0.907049 -10.971681 2.698363  
O -3.817089 -10.012539 2.863351  
O 3.305375 -7.284388 -0.359267  
O -1.307573 -2.148059 1.304653  
O -0.144321 -5.773035 -2.039661  
O -3.711863 -9.338395 -2.457552

#### **Glutamic**

#### **Guanine-Bind O**

76

N -0.051024 2.229307 0.900361  
H 0.039600 1.762297 1.813838  
C -0.056438 2.062839 -1.448285  
C -0.119274 3.607048 0.869522  
C -0.097457 3.498776 -1.363431  
C -0.048310 2.743869 -3.464375  
H -0.043096 2.793157 -4.568177  
C 0.049975 1.372438 -0.198223  
N -0.152590 4.304033 -0.261577  
O 0.267191 0.149611 0.062190  
N -0.054980 4.207297 2.129180  
H -0.441744 5.161123 2.123516  
H -0.497579 3.642282 2.864347  
N -0.043142 1.619074 -2.766154

N -0.057734 3.896714 -2.678722  
H -0.102340 4.868364 -3.002993  
O -0.879551 -4.128521 -3.985860  
O -4.858703 -6.880769 2.792167  
O 2.967160 -5.024804 1.804549  
O 2.057834 -8.834307 1.183511  
Ti -1.525707 -3.910615 1.415124  
Ti -3.177511 -6.154772 2.252664  
Ti -4.795194 -8.582501 2.042353  
O 4.031488 -7.920823 2.563575  
O 1.125888 -8.585592 -1.369715  
Ti -0.819801 -3.715866 -2.146186  
Ti 1.571023 -4.197192 0.855034  
O -0.447950 -1.918987 -1.829134  
O -1.724696 -8.029392 -1.184168  
Ti -3.727018 -8.695901 -0.678260  
Ti -2.164305 -9.737401 1.936301  
Ti 3.531258 -9.636724 2.050879  
Ti -0.209471 -6.652196 2.105995  
Ti -0.188573 -8.389429 -5.396494  
Ti 2.998687 -8.968221 -0.692518  
Ti -0.011204 -1.857090 0.005914  
Ti 2.717060 -6.850455 1.715744  
Ti -0.574190 -9.604374 -0.770963  
Ti 0.675229 -10.212660 1.930483  
Ti 1.839599 -8.481110 -3.296965  
Ti -2.390840 -6.130198 -1.298785  
Ti 1.712251 -6.194268 -1.321834  
Ti -2.068446 -8.797615 -3.191767  
Ti -0.782164 -5.964963 -3.955176  
O -3.030444 -4.303582 2.443351  
O 4.170201 -10.027172 0.370401  
O 0.990525 -6.295462 0.541749  
O -4.030992 -6.811209 -0.979934  
O -1.002695 -10.226070 -2.399256  
O -0.012229 -4.580777 2.280407  
O -0.535438 -8.615430 1.516150  
O 2.257893 -6.719732 -3.083647  
O 2.259656 -10.762176 2.827062  
O 1.299610 -7.005305 3.026055  
O -1.917135 -5.783974 0.676520  
O 3.315887 -9.302803 -2.482735  
O -2.395734 -6.665899 -3.319425  
O -5.282325 -9.094165 0.312754  
O -0.437019 -6.602972 -5.723363  
O -0.149864 -7.934541 -3.555435  
O 2.256466 -4.529048 -0.940995  
O -2.363576 -10.201581 0.137523  
O 0.483270 -10.848670 0.228779  
O -3.163133 -8.014616 1.281471  
O 1.542468 -9.012584 -5.100819  
O 1.601523 -2.341951 0.865292  
O -0.219593 -3.816702 -0.176266  
O -1.827044 -9.209997 -5.012224

O -2.494181 -4.262320 -1.627875  
O -1.747708 -6.712672 3.240293  
O -0.904224 -10.853245 2.707235  
O -3.821433 -9.909343 2.866853  
O 3.295278 -7.150355 -0.368932  
O -1.408608 -2.030108 1.205386  
O -0.151512 -5.665391 -2.054421  
O -3.712568 -9.261702 -2.451923

#### **Guanine-Bind N**

76

N 0.052241 2.231309 1.105844  
H 0.015262 2.703902 2.019146  
C 0.061760 2.352671 -1.265088  
C 0.034678 0.866494 1.094498  
C 0.053789 0.934551 -1.184192  
C 0.043565 1.612970 -3.273266  
H 0.033152 1.546506 -4.375063  
C 0.064832 3.136844 -0.038613  
N 0.055279 0.157192 -0.049968  
O 0.062885 4.357750 0.164468  
N 0.049454 0.167761 2.273195  
H -0.488674 -0.730246 2.212211  
H -0.195148 0.729185 3.096618  
N 0.053614 2.751515 -2.583545  
N 0.051333 0.477944 -2.470105  
H -0.014735 -0.551788 -2.647969  
O -0.786030 -4.238086 -3.968400  
O -4.781314 -6.894543 2.897245  
O 3.025158 -5.231734 1.823748  
O 2.076063 -9.010813 1.195384  
Ti -1.400950 -4.005988 1.517537  
Ti -3.097603 -6.201436 2.349291  
Ti -4.776005 -8.592295 2.128889  
O 4.061416 -8.142997 2.571007  
O 1.124389 -8.693630 -1.345979  
Ti -0.706020 -3.860219 -2.134211  
Ti 1.644827 -4.401130 0.880599  
O -0.158580 -2.073081 -1.841150  
O -1.721338 -8.076667 -1.127720  
Ti -3.733264 -8.728827 -0.597762  
Ti -2.170889 -9.818708 1.963868  
Ti 3.543761 -9.857358 2.052748  
Ti -0.153866 -6.809297 2.156641  
Ti -0.239514 -8.529241 -5.376562  
Ti 2.995035 -9.165482 -0.687081  
Ti 0.157947 -2.006938 0.043188  
Ti 2.763487 -7.060996 1.732756  
Ti -0.587072 -9.678658 -0.730817  
Ti 0.669940 -10.358690 1.936435  
Ti 1.822051 -8.657727 -3.293762  
Ti -2.360687 -6.185395 -1.222596  
Ti 1.733009 -6.393454 -1.312822  
Ti -2.105211 -8.850725 -3.139460  
Ti -0.773841 -6.086551 -3.949508

O -2.896563 -4.354673 2.562938  
O 4.161045 -10.238229 0.365330  
O 1.020948 -6.457234 0.574327  
O -4.007831 -6.828110 -0.898776  
O -1.038180 -10.282653 -2.358404  
O 0.099675 -4.726273 2.346420  
O -0.513717 -8.734539 1.523672  
O 2.279899 -6.905821 -3.074856  
O 2.247982 -10.959311 2.810856  
O 1.349616 -7.204407 3.060556  
O -1.870307 -5.849108 0.750494  
O 3.277527 -9.513253 -2.478941  
O -2.389072 -6.725230 -3.282932  
O -5.287700 -9.087562 0.401282  
O -0.470571 -6.740559 -5.715979  
O -0.159520 -8.042013 -3.539727  
O 2.296602 -4.731040 -0.913656  
O -2.393194 -10.252005 0.164686  
O 0.462069 -10.960831 0.225296  
O -3.134081 -8.054560 1.346913  
O 1.486855 -9.187145 -5.087378  
O 1.726253 -2.514624 0.870495  
O -0.169452 -3.950895 -0.130259  
O -1.886737 -9.298257 -4.958276  
O -2.400831 -4.321616 -1.619167  
O -1.674434 -6.822684 3.309720  
O -0.922253 -10.959282 2.714109  
O -3.820665 -9.953779 2.909224  
O 3.315677 -7.351494 -0.360754  
O -1.191932 -2.118649 1.343888  
O -0.106303 -5.790568 -2.040458  
O -3.737056 -9.290758 -2.370676

### **Dopamine**

82

C -0.035965 1.581194 0.147259  
C -0.089363 1.894883 -1.240068  
O 0.171926 0.237742 0.567415  
O 0.040920 0.974385 -2.259312  
H 0.124998 0.265577 1.556302  
H -0.123601 0.034000 -1.951991  
C -0.251548 3.267772 -1.585918  
H -0.272283 3.552955 -2.658685  
C -0.160558 2.567273 1.145848  
H -0.114524 2.259270 2.214063  
C -0.372455 4.279454 -0.596114  
C -0.580222 5.747889 -0.935782  
C 0.422302 6.360672 -1.933439  
H 1.450492 5.976520 -1.717790  
H 0.450233 7.472250 -1.769968  
N 0.055630 5.968656 -3.310233  
H 0.640737 6.492168 -3.980740  
H -0.900902 6.317965 -3.479667  
C -0.329767 3.915686 0.776793  
H -0.428842 4.701656 1.552910

H -0.544759 6.327052 0.017534  
H -1.612835 5.896368 -1.346964  
O -0.793424 -4.086532 -3.950138  
O -4.815736 -6.882137 2.791378  
O 2.996285 -5.082211 1.828695  
O 2.066783 -8.883447 1.188051  
Ti -1.472929 -3.937299 1.472616  
Ti -3.130709 -6.171136 2.255729  
Ti -4.780808 -8.579774 2.036835  
O 4.048135 -8.002373 2.568421  
O 1.125949 -8.578818 -1.355724  
Ti -0.779374 -3.663430 -2.124736  
Ti 1.617954 -4.244181 0.885627  
O -0.368665 -1.811767 -1.737066  
O -1.715164 -8.004729 -1.193789  
Ti -3.720582 -8.674258 -0.684864  
Ti -2.165312 -9.779919 1.917977  
Ti 3.530866 -9.720247 2.047506  
Ti -0.165154 -6.711551 2.138551  
Ti -0.175633 -8.371052 -5.399386  
Ti 2.998068 -9.011137 -0.686128  
Ti 0.042829 -1.876077 0.098535  
Ti 2.756283 -6.916721 1.728684  
Ti -0.582006 -9.603841 -0.783221  
Ti 0.671169 -10.275113 1.896372  
Ti 1.835896 -8.521774 -3.287261  
Ti -2.366041 -6.097931 -1.303335  
Ti 1.707225 -6.245964 -1.310115  
Ti -2.062353 -8.767518 -3.201639  
Ti -0.740554 -5.936390 -3.952967  
O -2.980196 -4.322100 2.482093  
O 4.160940 -10.096218 0.365203  
O 1.008261 -6.336404 0.568717  
O -4.003698 -6.782424 -0.980992  
O -1.001736 -10.202418 -2.424945  
O 0.044860 -4.629145 2.310494  
O -0.522372 -8.662392 1.516064  
O 2.268347 -6.762796 -3.066609  
O 2.248313 -10.850846 2.788819  
O 1.333785 -7.083848 3.051659  
O -1.894362 -5.773930 0.674878  
O 3.297195 -9.364591 -2.476631  
O -2.368725 -6.607081 -3.329167  
O -5.273239 -9.076891 0.303399  
O -0.384649 -6.574936 -5.715262  
O -0.143333 -7.913133 -3.555277  
O 2.274612 -4.588520 -0.907243  
O -2.364212 -10.203973 0.104563  
O 0.485439 -10.864731 0.175623  
O -3.136744 -8.028340 1.274468  
O 1.531514 -9.046203 -5.090130  
O 1.650481 -2.368542 0.911972  
O -0.188355 -3.800782 -0.154994  
O -1.821458 -9.175438 -5.023812

O -2.446805 -4.210528 -1.636185  
O -1.719737 -6.764205 3.246051  
O -0.911286 -10.919686 2.662911  
O -3.819005 -9.924593 2.848436  
O 3.308893 -7.202074 -0.354716  
O -1.318007 -2.053727 1.329178  
O -0.140161 -5.640544 -2.034408  
O -3.709887 -9.214692 -2.465177

### Histidine

80

C 0.618757 3.579329 -3.029737  
N 0.758722 2.855021 -1.921276  
N 0.650317 4.928952 -2.765575  
H 0.557910 5.682732 -3.449769  
C 0.891053 3.781825 -0.891117  
C 1.029882 3.378452 0.553316  
C -0.043134 2.341973 1.000260  
H -0.983592 2.556095 0.436358  
O 1.324818 0.353882 1.289239  
H 1.394249 -0.715961 0.922111  
O -0.260451 0.328595 -0.344763  
C 0.365321 0.922162 0.607219  
N -0.338908 2.332290 2.451493  
H 0.483872 1.919987 2.925529  
H -0.327238 3.317365 2.762445  
C 0.819756 5.086292 -1.402140  
H 0.873692 6.067715 -0.903522  
H 0.484413 3.166888 -4.045381  
H 2.052840 2.986348 0.780501  
H 0.882343 4.280520 1.194351  
O -0.988337 -4.423360 -4.326985  
O -4.865899 -6.679033 2.737555  
O 2.809613 -4.516087 1.500860  
O 2.123727 -8.442583 1.266900  
Ti -1.713972 -3.749905 0.997131  
Ti -3.216457 -5.956264 2.107689  
Ti -4.780844 -8.433686 2.125823  
O 4.035147 -7.290249 2.545310  
O 1.205544 -8.552639 -1.283101  
Ti -1.010620 -3.822927 -2.542653  
Ti 1.399541 -3.839916 0.476095  
O -0.850990 -1.939191 -2.407134  
O -1.709292 -8.056696 -1.153639  
Ti -3.693080 -8.787081 -0.574323  
Ti -2.086777 -9.465211 2.115731  
Ti 3.617460 -9.083637 2.220928  
Ti -0.234338 -6.312158 1.956873  
Ti -0.111001 -8.776482 -5.289847  
Ti 3.095741 -8.718285 -0.582528  
Ti -0.470884 -1.662992 -0.625927  
Ti 2.694047 -6.372674 1.586715  
Ti -0.484428 -9.528807 -0.574420  
Ti 0.792418 -9.808808 2.140088  
Ti 1.908235 -8.563817 -3.197422



Ti -2.478132 -6.238469 -1.471735  
Ti 1.675780 -6.048032 -1.488033  
Ti -2.003236 -9.044186 -3.069269  
Ti -0.806412 -6.242765 -4.111051  
O -3.155453 -4.097395 2.118477  
O 4.302805 -9.601143 0.593322  
O 0.945031 -6.013960 0.363359  
O -4.078637 -6.955192 -1.077984  
O -0.889061 -10.328943 -2.134158  
O -0.149173 -4.206074 1.921447  
O -0.485514 -8.331167 1.525320  
O 2.232545 -6.766720 -3.172563  
O 2.397994 -10.200783 3.082847  
O 1.278261 -6.485631 2.908949  
O -1.995650 -5.672378 0.465072  
O 3.449490 -9.193811 -2.329973  
O -2.410145 -6.935633 -3.415819  
O -5.229387 -9.149158 0.456344  
O -0.422687 -7.042252 -5.797803  
O -0.110992 -8.136774 -3.505514  
O 2.132991 -4.322060 -1.263947  
O -2.259319 -10.121982 0.376053  
O 0.628104 -10.634767 0.525093  
O -3.164321 -7.872516 1.291088  
O 1.642843 -9.294644 -4.933607  
O 1.252427 -1.944028 0.361904  
O -0.370558 -3.668978 -0.603359  
O -1.723127 -9.616567 -4.840982  
O -2.644428 -4.407468 -1.978526  
O -1.752778 -6.371424 3.113240  
O -0.765731 -10.414895 2.992135  
O -3.737785 -9.619752 3.062066  
O 3.277674 -6.855810 -0.443870  
O -1.858861 -1.919658 0.529453  
O -0.213728 -5.712810 -2.251744  
O -3.632956 -9.501637 -2.288001

### Phenylalanine

83

C 1.030267 4.180426 -3.685096  
H 0.962234 4.447081 -4.761971  
C 1.534152 2.539632 -1.927679  
C 1.447020 2.882109 -3.298219  
H 1.703894 2.123903 -4.068903  
C 0.699492 5.134462 -2.691866  
H 0.372954 6.156818 -2.980264  
C 1.202263 3.487115 -0.921631  
C 1.235534 3.148896 0.557870  
C 0.041504 2.251490 1.038629  
H -0.839300 2.491427 0.395171  
O 1.166784 0.155324 1.593000  
H 1.287727 -0.904111 1.196748  
O -0.140295 0.223930 -0.271202  
C 0.364740 0.782909 0.773713  
N -0.337058 2.429597 2.453509

H 0.412411 2.008605 3.030340  
H -0.257075 3.439173 2.655110  
C 0.782856 4.783182 -1.323378  
H 0.526589 5.523630 -0.535290  
H 1.854123 1.516738 -1.638035  
H 2.202726 2.677534 0.858462  
H 1.138656 4.098327 1.137375  
O -1.030805 -4.429586 -4.272868  
O -4.879734 -6.888972 2.665443  
O 2.819108 -4.717457 1.551978  
O 2.118898 -8.625104 1.193459  
Ti -1.708774 -3.903614 1.058394  
Ti -3.222873 -6.154236 2.072676  
Ti -4.782609 -8.634110 2.033942  
O 4.039217 -7.519788 2.500322  
O 1.206708 -8.653778 -1.364374  
Ti -1.012374 -3.889896 -2.468914  
Ti 1.401139 -4.014035 0.570318  
O -0.821314 -2.015269 -2.274353  
O -1.700376 -8.170907 -1.211060  
Ti -3.685644 -8.925478 -0.665042  
Ti -2.089261 -9.675850 2.015700  
Ti 3.613752 -9.302507 2.123322  
Ti -0.248979 -6.516271 1.952438  
Ti -0.108676 -8.748184 -5.379507  
Ti 3.094358 -8.844760 -0.672521  
Ti -0.418716 -1.788390 -0.488964  
Ti 2.690801 -6.577661 1.583656  
Ti -0.482582 -9.663106 -0.685231  
Ti 0.789368 -10.018000 2.030997  
Ti 1.910572 -8.599193 -3.280194  
Ti -2.475803 -6.346182 -1.477877  
Ti 1.680060 -6.141693 -1.479968  
Ti -1.996057 -9.096850 -3.165985  
Ti -0.810851 -6.251844 -4.121780  
O -3.171108 -4.292185 2.129090  
O 4.282146 -9.786080 0.478363  
O 0.940559 -6.167998 0.368903  
O -4.073705 -7.073554 -1.100709  
O -0.879714 -10.413033 -2.267912  
O -0.158930 -4.404774 1.980390  
O -0.489012 -8.517997 1.489084  
O 2.239286 -6.803406 -3.186498  
O 2.391486 -10.427007 2.968931  
O 1.269815 -6.710453 2.895593  
O -1.975686 -5.833417 0.469026  
O 3.448477 -9.265706 -2.433351  
O -2.406875 -6.987436 -3.446005  
O -5.228752 -9.301691 0.346468  
O -0.423297 -6.997096 -5.831646  
O -0.107007 -8.162567 -3.577216  
O 2.136014 -4.425932 -1.189711  
O -2.253670 -10.283397 0.253872  
O 0.632915 -10.790109 0.385429

O -3.158703 -8.058021 1.223174  
O 1.643856 -9.276840 -5.039501  
O 1.258724 -2.108423 0.546144  
O -0.361013 -3.787864 -0.528594  
O -1.714420 -9.612142 -4.951629  
O -2.641850 -4.496158 -1.910974  
O -1.774777 -6.582895 3.095541  
O -0.768870 -10.651002 2.864335  
O -3.744324 -9.844455 2.949756  
O 3.278732 -6.988050 -0.461815  
O -1.801502 -2.040987 0.669960  
O -0.199870 -5.770895 -2.255054  
O -3.621823 -9.588909 -2.399268

### **Analgesics**

#### **Salicylic**

76

C 0.073108 2.520150 1.210034  
C 0.026300 3.307102 2.402753  
C 0.027966 3.189259 -0.046562  
H 0.059291 2.562735 -0.963903  
C -0.056060 4.715866 2.338716  
C -0.052892 4.594044 -0.116990  
H -0.085065 5.099342 -1.104449  
H -0.091627 5.299118 3.285434  
C -0.093877 5.357857 1.080408  
H -0.158172 6.466442 1.037598  
C 0.165651 1.036132 1.228518  
O 0.250089 0.375514 2.394377  
H 0.210201 1.056264 3.130581  
O 0.170776 0.377933 0.143852  
O 0.057174 2.639807 3.626489  
H 0.037403 3.313928 4.346084  
O -0.769912 -4.037211 -4.035107  
O -4.862617 -6.705129 2.757631  
O 2.962451 -4.957092 1.742741  
O 2.036094 -8.778710 1.154495  
Ti -1.503002 -3.795757 1.369057  
Ti -3.179177 -5.997877 2.209530  
Ti -4.815848 -8.405818 2.008382  
O 3.992867 -7.859136 2.550034  
O 1.107107 -8.514594 -1.378043  
Ti -0.781383 -3.605884 -2.199200  
Ti 1.588429 -4.102415 0.781825  
O -0.367215 -1.794558 -1.878135  
O -1.748707 -7.904070 -1.216459  
Ti -3.765625 -8.550279 -0.710726  
Ti -2.206581 -9.611197 1.906065  
Ti 3.495223 -9.579444 2.048378  
Ti -0.211056 -6.543499 2.068482  
Ti -0.197675 -8.338406 -5.414407  
Ti 2.992532 -8.921356 -0.698036  
Ti 0.007907 -1.730092 -0.047542  
Ti 2.702925 -6.781814 1.674579  
Ti -0.608274 -9.500076 -0.784044

Ti 0.620834 -10.133841 1.902276  
 Ti 1.809631 -8.471101 -3.298305  
 Ti -2.398199 -6.001720 -1.373642  
 Ti 1.694897 -6.150934 -1.361789  
 Ti -2.096403 -8.689913 -3.213933  
 Ti -0.721339 -5.878879 -4.007435  
 O -2.991787 -4.155824 2.431222  
 O 4.160831 -9.970494 0.377377  
 O 0.973409 -6.219751 0.496648  
 O -4.044532 -6.667057 -1.051860  
 O -1.047340 -10.122345 -2.413141  
 O 0.014615 -4.472409 2.230853  
 O -0.557040 -8.521560 1.481041  
 O 2.257987 -6.713292 -3.106422  
 O 2.197577 -10.688712 2.812894  
 O 1.281824 -6.922614 2.990893  
 O -1.943888 -5.638104 0.616378  
 O 3.273470 -9.313294 -2.482665  
 O -2.368672 -6.534599 -3.386423  
 O -5.323124 -8.919646 0.282660  
 O -0.368957 -6.543916 -5.763879  
 O -0.160137 -7.862226 -3.579506  
 O 2.267223 -4.488722 -0.998725  
 O -2.418906 -10.067050 0.109155  
 O 0.431928 -10.770033 0.197993  
 O -3.183006 -7.863577 1.232124  
 O 1.507722 -9.017585 -5.098452  
 O 1.631543 -2.243325 0.777294  
 O -0.197545 -3.710915 -0.237172  
 O -1.854280 -9.118788 -5.035178  
 O -2.466795 -4.128450 -1.721027  
 O -1.758905 -6.598687 3.188225  
 O -0.969665 -10.760644 2.667337  
 O -3.859623 -9.740393 2.842678  
 O 3.284970 -7.106223 -0.386706  
 O -1.414031 -1.924645 1.115907  
 O -0.142799 -5.576966 -2.092336  
 O -3.746708 -9.127571 -2.479854

#### Paracetamol

80

C -0.046083 3.713988 0.421781  
 C -0.043337 4.192613 1.761236  
 C -0.062654 4.644401 -0.653369  
 H -0.047248 4.265249 -1.697706  
 C -0.061089 5.578200 2.016864  
 C -0.074562 6.029022 -0.401182  
 H -0.079290 6.754065 -1.244300  
 H -0.047006 5.953918 3.061186  
 C -0.069202 6.504516 0.937779  
 O -0.057670 7.851617 1.242454  
 H -0.064432 8.332865 0.379878  
 N 0.054412 2.346998 0.056177  
 C -0.055170 1.194305 0.745668  
 C -0.610881 1.099426 2.143604

H 0.372028 2.187031 -0.911754  
H -0.009516 3.485192 2.606892  
O 0.330797 0.141887 0.117704  
H -1.388403 1.864558 2.343973  
H 0.205952 1.236234 2.889698  
H -1.029983 0.076776 2.268817  
O -0.840985 -4.110122 -3.926823  
O -4.866311 -6.885262 2.791106  
O 2.968113 -5.124260 1.825706  
O 2.045493 -8.914893 1.155201  
Ti -1.494440 -3.936492 1.504219  
Ti -3.176618 -6.167461 2.283896  
Ti -4.806682 -8.583651 2.031173  
O 4.012957 -8.032781 2.558162  
O 1.130934 -8.647222 -1.391481  
Ti -0.798183 -3.722129 -2.079056  
Ti 1.585088 -4.271261 0.886687  
O -0.385482 -1.925648 -1.733404  
O -1.732036 -8.027287 -1.182517  
Ti -3.721857 -8.699295 -0.677879  
Ti -2.196065 -9.775828 1.920710  
Ti 3.505325 -9.742213 2.024601  
Ti -0.206928 -6.719535 2.139058  
Ti -0.206156 -8.359297 -5.398037  
Ti 3.005660 -9.026938 -0.722069  
Ti 0.031729 -1.875542 0.097447  
Ti 2.706515 -6.947987 1.721663  
Ti -0.599413 -9.622320 -0.792227  
Ti 0.637399 -10.281724 1.887566  
Ti 1.832132 -8.508126 -3.312797  
Ti -2.397835 -6.119970 -1.269596  
Ti 1.694000 -6.252545 -1.307282  
Ti -2.096904 -8.773946 -3.201846  
Ti -0.790389 -5.948629 -3.932942  
O -3.000038 -4.322060 2.532050  
O 4.156375 -10.110260 0.342353  
O 0.973348 -6.367485 0.563501  
O -4.033396 -6.805304 -0.962827  
O -1.042520 -10.218316 -2.427273  
O 0.017302 -4.644333 2.341353  
O -0.549261 -8.668826 1.507047  
O 2.249769 -6.750964 -3.070065  
O 2.216889 -10.861881 2.775949  
O 1.294820 -7.105184 3.048943  
O -1.939366 -5.775674 0.711289  
O 3.329373 -9.318178 -2.521422  
O -2.409804 -6.638568 -3.301210  
O -5.284986 -9.087794 0.300269  
O -0.449947 -6.570059 -5.707223  
O -0.160580 -7.925182 -3.557082  
O 2.252303 -4.596836 -0.910570  
O -2.393241 -10.214471 0.111377  
O 0.444195 -10.896796 0.178062  
O -3.162347 -8.026461 1.286002

O 1.527878 -8.994818 -5.127237  
O 1.645986 -2.417045 0.905091  
O -0.225948 -3.857553 -0.108184  
O -1.849562 -9.176081 -5.027070  
O -2.486839 -4.251477 -1.606723  
O -1.755767 -6.778675 3.260629  
O -0.947981 -10.922362 2.659875  
O -3.850812 -9.926802 2.851551  
O 3.282366 -7.214646 -0.364087  
O -1.352373 -2.043658 1.318886  
O -0.157515 -5.681422 -2.021837  
O -3.734142 -9.241445 -2.457722

### Aspirin

81

C 0.151811 2.500786 1.192155  
C 0.179867 3.320401 2.365381  
C 0.048282 3.132459 -0.078560  
H 0.026576 2.483132 -0.979384  
C 0.110891 4.727713 2.272547  
C -0.025088 4.536832 -0.179650  
H -0.104116 5.016590 -1.177541  
H 0.128475 5.344301 3.190997  
C 0.007546 5.329614 0.996352  
H -0.043133 6.436889 0.928945  
C 0.223312 1.010992 1.235300  
O 0.353646 0.378555 2.410471  
H 0.381484 1.100634 3.115423  
O 0.159835 0.333925 0.164677  
O 0.359985 2.655317 3.599947  
C -0.427846 3.053539 4.752308  
O -1.158695 4.025126 4.747495  
C -0.164451 2.067829 5.866345  
H 0.745315 1.462704 5.665155  
H -1.037638 1.376749 5.954451  
H -0.067953 2.608778 6.831969  
O -0.846846 -4.124328 -3.967742  
O -4.856054 -6.808542 2.832797  
O 2.956342 -4.996626 1.800463  
O 2.042187 -8.822177 1.208624  
Ti -1.505840 -3.876576 1.410501  
Ti -3.181957 -6.090164 2.265400  
Ti -4.816258 -8.508957 2.079878  
O 4.015997 -7.893952 2.570780  
O 1.117940 -8.599811 -1.331193  
Ti -0.803963 -3.688750 -2.132512  
Ti 1.582366 -4.154457 0.833742  
O -0.425742 -1.866773 -1.814117  
O -1.747687 -7.997703 -1.161830  
Ti -3.762091 -8.653685 -0.640584  
Ti -2.198927 -9.691960 1.967443  
Ti 3.504783 -9.624199 2.094546  
Ti -0.210897 -6.619181 2.123865  
Ti -0.208004 -8.406961 -5.354794  
Ti 2.997250 -8.977716 -0.663002

Ti -0.004169 -1.788418 0.007795  
 Ti 2.703234 -6.825992 1.725550  
 Ti -0.602867 -9.578843 -0.726187  
 Ti 0.640180 -10.186548 1.963467  
 Ti 1.815529 -8.507926 -3.258662  
 Ti -2.400382 -6.097261 -1.281907  
 Ti 1.695776 -6.201982 -1.311400  
 Ti -2.100535 -8.788835 -3.152730  
 Ti -0.789346 -5.965445 -3.934296  
 O -3.031905 -4.240402 2.427377  
 O 4.152801 -10.038059 0.423509  
 O 0.981940 -6.282830 0.555236  
 O -4.045207 -6.766941 -0.955576  
 O -1.046622 -10.212654 -2.348673  
 O 0.008519 -4.536300 2.279203  
 O -0.553709 -8.585664 1.527530  
 O 2.241741 -6.746464 -3.066172  
 O 2.221847 -10.741755 2.866889  
 O 1.290485 -6.966566 3.053014  
 O -1.912127 -5.752142 0.683326  
 O 3.300623 -9.326371 -2.451624  
 O -2.413954 -6.634742 -3.300762  
 O -5.317850 -9.024905 0.356008  
 O -0.443828 -6.621012 -5.695208  
 O -0.170180 -7.939518 -3.517437  
 O 2.254062 -4.534700 -0.955086  
 O -2.405323 -10.160013 0.170915  
 O 0.443359 -10.836236 0.267494  
 O -3.180748 -7.959879 1.306047  
 O 1.519153 -9.044108 -5.059199  
 O 1.632654 -2.291425 0.802079  
 O -0.204198 -3.782809 -0.176363  
 O -1.848815 -9.219421 -4.970013  
 O -2.478652 -4.221600 -1.621226  
 O -1.753218 -6.648465 3.257760  
 O -0.945447 -10.801804 2.754097  
 O -3.854601 -9.847866 2.895824  
 O 3.279307 -7.154128 -0.356554  
 O -1.395554 -1.998984 1.201026  
 O -0.163235 -5.658411 -2.032090  
 O -3.749322 -9.226156 -2.413875

### **Ibuprofen**

93

C 1.661718 2.989502 -0.921272  
 C 0.950959 3.408198 0.233997  
 C 1.875234 3.927527 -1.963927  
 H 2.425710 3.603119 -2.872141  
 C 0.484908 4.739235 0.341323  
 C 1.409074 5.256384 -1.851154  
 H 1.608142 5.980613 -2.667962  
 H -0.052705 5.069465 1.254031  
 C 0.707824 5.685593 -0.693052  
 C 0.268571 7.131047 -0.539714  
 H -0.409315 7.217299 0.344872

H -0.318244 7.453177 -1.436217  
C 1.456444 8.109662 -0.346075  
C 2.232503 7.772884 0.939643  
H 1.568337 7.896768 1.828597  
H 3.110969 8.443773 1.072019  
H 2.587709 6.717365 0.926733  
C 0.949282 9.561966 -0.328498  
H 1.789868 10.285222 -0.220906  
H 0.254771 9.714130 0.532025  
H 0.392215 9.807768 -1.263111  
C 2.245673 1.580013 -1.042173  
H 2.845143 1.553056 -1.983648  
H 3.566162 0.187378 0.055298  
H 3.930868 1.943381 0.301645  
H 2.498670 1.188143 1.097712  
C 3.115863 1.198710 0.173921  
H 0.780457 2.691605 1.062230  
C 1.137587 0.540978 -1.247024  
O 0.548121 0.066532 -0.152333  
O 0.835032 0.140387 -2.416183  
H 0.033981 -0.994594 -2.201886  
H 2.142744 7.976009 -1.224184  
O -0.835853 -4.112373 -3.942861  
O -4.882446 -6.913769 2.800607  
O 2.928803 -5.098354 1.834510  
O 2.034492 -8.904988 1.146719  
Ti -1.520085 -3.933567 1.492219  
Ti -3.197497 -6.193192 2.275137  
Ti -4.872925 -8.597045 2.005441  
O 3.989056 -8.013383 2.552436  
O 1.111051 -8.622151 -1.374956  
Ti -0.820622 -3.743577 -2.110566  
Ti 1.536156 -4.252251 0.908586  
O -0.450048 -1.874000 -1.765298  
O -1.752342 -8.031148 -1.205382  
Ti -3.782163 -8.702357 -0.700353  
Ti -2.233251 -9.767757 1.893812  
Ti 3.497194 -9.731974 2.018559  
Ti -0.233104 -6.735533 2.103040  
Ti -0.207003 -8.387420 -5.403302  
Ti 2.994973 -9.003135 -0.711656  
Ti 0.009545 -1.794145 0.219044  
Ti 2.695781 -6.928763 1.709879  
Ti -0.605810 -9.624686 -0.790119  
Ti 0.616890 -10.266208 1.892855  
Ti 1.814886 -8.490097 -3.295983  
Ti -2.406244 -6.144066 -1.284106  
Ti 1.694148 -6.204521 -1.304916  
Ti -2.100937 -8.796504 -3.205122  
Ti -0.795274 -5.965830 -3.967912  
O -3.041197 -4.344537 2.484709  
O 4.160073 -10.076824 0.339086  
O 0.953186 -6.328963 0.544688  
O -4.052270 -6.806190 -0.990085



O -1.044655 -10.225732 -2.427967  
 O -0.026970 -4.655274 2.330079  
 O -0.575278 -8.664987 1.447714  
 O 2.238294 -6.728367 -3.061621  
 O 2.203058 -10.855315 2.760331  
 O 1.264788 -7.121980 3.015942  
 O -1.944615 -5.789847 0.686534  
 O 3.299701 -9.318704 -2.505231  
 O -2.410517 -6.634883 -3.337432  
 O -5.347054 -9.091299 0.264556  
 O -0.456553 -6.597873 -5.730810  
 O -0.171488 -7.918708 -3.560295  
 O 2.219630 -4.536544 -0.898999  
 O -2.432415 -10.208715 0.090001  
 O 0.424269 -10.894496 0.187393  
 O -3.221969 -8.030325 1.252862  
 O 1.520496 -9.015739 -5.099286  
 O 1.565067 -2.393615 1.049055  
 O -0.255517 -3.766432 -0.127247  
 O -1.840750 -9.208257 -5.026917  
 O -2.490026 -4.257963 -1.643830  
 O -1.771459 -6.809650 3.236232  
 O -0.972829 -10.881523 2.666993  
 O -3.903724 -9.945375 2.795186  
 O 3.266773 -7.179609 -0.358235  
 O -1.347884 -2.029590 1.408308  
 O -0.174380 -5.666118 -2.029532  
 O -3.750766 -9.240467 -2.480849

### Tramadol

104

C 2.048589 2.276338 -3.579635  
 O 3.126529 1.557734 -4.068828  
 C 3.871059 2.199807 -5.119370  
 H 4.312000 3.169504 -4.779106  
 H 4.687589 1.503833 -5.400184  
 H 3.236873 2.407022 -6.014672  
 H -1.022174 4.093592 -1.919521  
 C -0.165304 3.575614 -2.386124  
 C 1.362357 1.669769 -2.495002  
 H 1.752984 0.721155 -2.086542  
 C 0.259386 2.311654 -1.890954  
 C 1.632170 3.542481 -4.068935  
 C 0.521398 4.179367 -3.462464  
 H 2.165247 4.025586 -4.907639  
 H 0.187145 5.167076 -3.840260  
 C 1.608177 2.740171 0.669415  
 H 1.774316 3.469802 -0.156053  
 H 1.827726 3.281458 1.634006  
 N 2.552448 1.639528 0.455934  
 C 2.786070 0.866852 1.680251  
 C 3.818306 2.157797 -0.069211  
 H 1.885154 0.288515 1.966866  
 H 3.632716 2.671088 -1.038238  
 H 3.608998 0.140475 1.509073

H 4.517005 1.312176 -0.245989  
H 3.061117 1.524467 2.550769  
H 4.327545 2.887367 0.621540  
H -0.409231 3.384277 0.624616  
O -0.042064 0.247436 -0.629455  
H -0.219529 -0.092871 -1.554335  
C -0.403247 1.701652 -0.645493  
C -1.951152 1.769974 -0.687342  
H -2.307094 1.250912 -1.609506  
H -2.239304 2.842175 -0.787160  
C 0.101096 2.385948 0.657359  
C -2.595034 1.156781 0.572173  
H -2.433767 0.052891 0.567561  
H -3.699116 1.313017 0.533608  
C -0.475202 1.672971 1.898682  
H -0.142294 0.609227 1.936427  
C -2.016547 1.744443 1.877333  
H -2.443175 1.205644 2.756687  
H -0.065100 2.158108 2.815410  
H -2.320866 2.817546 1.973455  
O -0.847752 -4.159434 -3.931148  
O -4.860192 -6.798267 2.849681  
O 2.950197 -5.028031 1.864227  
O 2.044491 -8.847745 1.249766  
Ti -1.495677 -3.869020 1.492376  
Ti -3.173844 -6.098324 2.308721  
Ti -4.815530 -8.510971 2.118355  
O 4.004474 -7.943813 2.639124  
O 1.133409 -8.641796 -1.290524  
Ti -0.802189 -3.722566 -2.099415  
Ti 1.577541 -4.184485 0.914393  
O -0.359548 -1.932701 -1.818326  
O -1.734767 -8.023557 -1.107117  
Ti -3.729262 -8.684458 -0.590563  
Ti -2.199790 -9.697028 2.030551  
Ti 3.506615 -9.667387 2.125592  
Ti -0.219701 -6.634749 2.191790  
Ti -0.198067 -8.437728 -5.302194  
Ti 3.008661 -8.983011 -0.617011  
Ti 0.006791 -1.795752 0.078897  
Ti 2.702657 -6.867568 1.794078  
Ti -0.597634 -9.603798 -0.672932  
Ti 0.636561 -10.197293 2.017260  
Ti 1.841120 -8.509343 -3.205964  
Ti -2.389910 -6.112190 -1.219764  
Ti 1.698020 -6.202266 -1.241183  
Ti -2.086311 -8.811363 -3.099971  
Ti -0.775611 -5.997134 -3.890966  
O -3.033034 -4.244381 2.471114  
O 4.158289 -10.056948 0.449055  
O 0.972953 -6.273075 0.618437  
O -4.026345 -6.784035 -0.879899  
O -1.044479 -10.241204 -2.291752  
O 0.007010 -4.549787 2.356913

O -0.552263 -8.591598 1.574644  
 O 2.245504 -6.743592 -2.993005  
 O 2.222743 -10.765711 2.905505  
 O 1.283354 -7.022910 3.104283  
 O -1.885253 -5.750548 0.749077  
 O 3.343431 -9.299325 -2.406037  
 O -2.395418 -6.663291 -3.247308  
 O -5.290085 -9.053239 0.398433  
 O -0.441306 -6.655611 -5.651847  
 O -0.156153 -7.959378 -3.466090  
 O 2.250920 -4.533435 -0.871367  
 O -2.400832 -10.174671 0.234048  
 O 0.433065 -10.860888 0.332673  
 O -3.166462 -7.965743 1.361635  
 O 1.537555 -9.056934 -5.002275  
 O 1.580623 -2.291944 0.930441  
 O -0.222963 -3.760286 -0.114929  
 O -1.838325 -9.248151 -4.916306  
 O -2.482024 -4.246915 -1.572051  
 O -1.757287 -6.660228 3.321015  
 O -0.945827 -10.796558 2.826027  
 O -3.858255 -9.842958 2.952699  
 O 3.273527 -7.158049 -0.280515  
 O -1.346872 -1.973288 1.300248  
 O -0.153528 -5.669881 -1.973012  
 O -3.736112 -9.247672 -2.360711

#### Anti-inflammatory

##### Enantyum

93

C 0.889467 3.351636 -1.188606  
 C 0.121248 3.668947 -0.034534  
 C 1.046635 4.333873 -2.192402  
 C -0.241633 5.946537 -0.867467  
 H -0.674583 6.959028 -0.737416  
 H 1.605730 4.105438 -3.120202  
 C -0.455565 4.950290 0.114728  
 C 0.516861 5.642709 -2.028944  
 C 0.766971 6.639126 -3.138619  
 O 0.800178 6.255020 -4.327999  
 C 1.019992 8.087037 -2.801697  
 C 1.474796 8.513630 -1.522877  
 H 1.607880 7.768867 -0.712756  
 C 0.889143 9.043533 -3.847108  
 H 0.566335 8.680313 -4.846657  
 C 1.632120 10.823149 -2.333935  
 H 1.874385 11.892561 -2.149889  
 C 1.781732 9.874683 -1.291886  
 H 2.148863 10.191554 -0.292431  
 C 1.183562 10.403685 -3.613827  
 H 1.070482 11.143332 -4.435466  
 H -1.063851 5.182303 1.013986  
 C 1.582128 1.985750 -1.287139  
 H 2.165332 1.842078 -0.344118  
 C 2.512342 1.835554 -2.505708

H 3.011344 0.841871 -2.501554  
H 3.301306 2.617437 -2.498334  
H 1.939003 1.926641 -3.452998  
H -0.014355 2.902214 0.758733  
C 0.556724 0.842237 -1.309555  
O 0.382216 0.183214 -0.163917  
O -0.036670 0.523369 -2.384229  
H -0.450231 -0.812786 -2.159345  
O -0.900813 -4.029308 -3.946457  
O -4.890474 -6.896803 2.706860  
O 2.901016 -5.051476 1.839849  
O 2.044968 -8.864645 1.164354  
Ti -1.525707 -3.897135 1.424881  
Ti -3.213665 -6.162509 2.170816  
Ti -4.828295 -8.609012 1.989965  
O 3.976974 -7.952519 2.579685  
O 1.122835 -8.573880 -1.381508  
Ti -0.892444 -3.669904 -2.120495  
Ti 1.530609 -4.204329 0.891220  
O -0.563907 -1.802248 -1.742469  
O -1.732030 -8.001621 -1.210711  
Ti -3.736139 -8.706679 -0.711338  
Ti -2.191601 -9.768275 1.876755  
Ti 3.518866 -9.679804 2.043228  
Ti -0.266038 -6.702294 2.054931  
Ti -0.176845 -8.293486 -5.407294  
Ti 3.000197 -8.961536 -0.698376  
Ti 0.006025 -1.720731 0.215363  
Ti 2.673814 -6.884363 1.728199  
Ti -0.576608 -9.591629 -0.797440  
Ti 0.663901 -10.250531 1.868577  
Ti 1.837706 -8.453615 -3.297275  
Ti -2.419035 -6.122656 -1.311373  
Ti 1.713810 -6.165040 -1.314864  
Ti -2.060703 -8.752756 -3.216218  
Ti -0.779641 -5.884344 -3.953492  
O -3.082741 -4.313211 2.361490  
O 4.172976 -10.024392 0.362230  
O 0.957410 -6.290314 0.521562  
O -4.047535 -6.805237 -0.985635  
O -0.994579 -10.174538 -2.452113  
O -0.046282 -4.616124 2.280624  
O -0.556444 -8.650256 1.424160  
O 2.259932 -6.691977 -3.071495  
O 2.239125 -10.824836 2.768492  
O 1.225211 -7.066448 2.998356  
O -1.908009 -5.783279 0.635543  
O 3.314465 -9.282219 -2.489359  
O -2.391817 -6.592681 -3.334608  
O -5.297984 -9.115568 0.257971  
O -0.396338 -6.493640 -5.713917  
O -0.149843 -7.849097 -3.561083  
O 2.245506 -4.504227 -0.898501  
O -2.378505 -10.215277 0.066956

O 0.474128 -10.866311 0.160181  
O -3.181070 -8.040466 1.227944  
O 1.530211 -8.971865 -5.099722  
O 1.567591 -2.338615 1.009407  
O -0.252364 -3.696900 -0.166148  
O -1.818393 -9.106849 -5.051204  
O -2.539919 -4.227668 -1.626958  
O -1.806233 -6.737158 3.184144  
O -0.918729 -10.861576 2.659235  
O -3.842726 -9.935558 2.802838  
O 3.277595 -7.140750 -0.357798  
O -1.328889 -1.995553 1.417640  
O -0.161461 -5.573067 -2.048825  
O -3.710982 -9.221567 -2.495488

#### Diclofenac

90

C -1.757447 0.876826 3.656891  
C -1.936099 1.348510 4.980288  
H -2.318794 0.661641 5.763643  
C -1.267991 1.736032 2.643530  
C -1.138145 3.565191 4.295648  
H -0.890858 4.621296 4.526269  
C -1.169642 1.234487 1.210401  
H -1.806585 1.867727 0.539415  
H -1.575251 0.198320 1.158639  
C 0.227885 1.196093 0.584646  
O 0.606388 0.165958 -0.054345  
O 1.036236 2.229561 0.659895  
H 0.518738 3.004345 1.187647  
C -1.627766 2.694006 5.297626  
C -0.959659 3.081624 2.981955  
N -0.458948 3.916681 1.892003  
H -1.228820 4.039268 1.205180  
C 0.035862 5.222787 2.198335  
C 1.270396 5.409935 2.888768  
Cl 2.191976 4.003058 3.403049  
C -0.657155 6.388728 1.756877  
Cl -2.173141 6.196006 0.862977  
C 1.051028 7.843488 2.715613  
H 1.446247 8.859711 2.919524  
C 1.766669 6.708208 3.162133  
H 2.725762 6.811995 3.711220  
C -0.158934 7.690991 2.000053  
H -0.728447 8.568802 1.630907  
H -1.767392 3.074679 6.330590  
H -1.996848 -0.172174 3.383426  
O -0.856323 -4.180996 -4.035211  
O -4.853897 -6.786539 2.788861  
O 2.964888 -5.066459 1.783776  
O 2.031457 -8.886060 1.214889  
Ti -1.485766 -3.877198 1.322957  
Ti -3.178098 -6.078672 2.219836  
Ti -4.806487 -8.501793 2.065408  
O 3.985594 -7.961640 2.608847

O 1.106355 -8.612242 -1.327247  
Ti -0.792123 -3.732620 -2.202420  
Ti 1.598050 -4.224932 0.802644  
O -0.352192 -1.928346 -1.911098  
O -1.733934 -8.021326 -1.167239  
Ti -3.729493 -8.672847 -0.638119  
Ti -2.204169 -9.726036 1.961825  
Ti 3.488295 -9.683830 2.121479  
Ti -0.217852 -6.637212 2.112831  
Ti -0.205751 -8.480160 -5.370852  
Ti 2.990734 -9.040428 -0.637465  
Ti 0.093266 -1.835069 -0.094763  
Ti 2.697230 -6.888938 1.723972  
Ti -0.601545 -9.614792 -0.739748  
Ti 0.619556 -10.241698 1.958973  
Ti 1.811032 -8.591419 -3.254429  
Ti -2.390900 -6.118952 -1.312474  
Ti 1.690573 -6.287088 -1.331181  
Ti -2.098809 -8.808969 -3.161471  
Ti -0.786447 -6.017240 -3.985949  
O -3.029014 -4.216060 2.317685  
O 4.157553 -10.078815 0.453648  
O 0.975794 -6.335421 0.544875  
O -4.027994 -6.783291 -0.963036  
O -1.038610 -10.243782 -2.361269  
O -0.002511 -4.541569 2.231607  
O -0.560422 -8.623234 1.572415  
O 2.267563 -6.836748 -3.072440  
O 2.185305 -10.789721 2.886692  
O 1.275903 -7.005571 3.040208  
O -1.884021 -5.773199 0.646380  
O 3.267165 -9.432689 -2.424362  
O -2.409711 -6.686479 -3.325878  
O -5.295899 -9.033846 0.349983  
O -0.441582 -6.698354 -5.739285  
O -0.163649 -7.977057 -3.541415  
O 2.277868 -4.630502 -0.974237  
O -2.406905 -10.176850 0.158661  
O 0.442071 -10.872639 0.251969  
O -3.161281 -7.967626 1.301865  
O 1.510137 -9.135928 -5.053702  
O 1.675267 -2.375978 0.774932  
O -0.170086 -3.824401 -0.249770  
O -1.853249 -9.269673 -4.971632  
O -2.468230 -4.243442 -1.661429  
O -1.765518 -6.615707 3.238138  
O -0.973476 -10.881127 2.713647  
O -3.857193 -9.843635 2.898626  
O 3.285056 -7.226632 -0.347115  
O -1.328180 -1.976278 1.084654  
O -0.145959 -5.690995 -2.092208  
O -3.739442 -9.246928 -2.407675

#### **Antibiotics**

#### **Pyrazinamide**

74

N -1.805176 0.995498 1.811714  
N -1.727584 3.803288 2.452190  
C -0.979932 1.873749 1.188451  
C -0.951174 3.258426 1.501728  
H -0.250855 3.940411 0.968156  
C -2.595910 1.546803 2.747096  
C -2.551807 2.932989 3.071711  
H -3.297099 0.860541 3.274097  
H -3.212973 3.345733 3.867334  
N 0.465855 2.141160 -0.781800  
H 0.136094 3.103224 -0.878508  
H 1.138512 1.764116 -1.457596  
C -0.000584 1.322362 0.180135  
O 0.439739 0.138218 0.257693  
O -0.787213 -4.120104 -3.920306  
O -4.849614 -6.832613 2.850291  
O 2.986792 -5.094399 1.826681  
O 2.030971 -8.894775 1.180686  
Ti -1.489969 -3.937321 1.493789  
Ti -3.150412 -6.152042 2.310690  
Ti -4.843336 -8.519586 2.065148  
O 4.023020 -8.017181 2.554844  
O 1.105595 -8.649170 -1.359903  
Ti -0.771901 -3.698471 -2.081217  
Ti 1.596202 -4.233638 0.902269  
O -0.386798 -1.888548 -1.719597  
O -1.745841 -8.010198 -1.167548  
Ti -3.768707 -8.654219 -0.651413  
Ti -2.231838 -9.722371 1.946438  
Ti 3.486847 -9.727818 2.048362  
Ti -0.188606 -6.692524 2.142778  
Ti -0.233840 -8.399521 -5.360994  
Ti 2.978167 -9.022475 -0.690464  
Ti 0.014231 -1.864273 0.124288  
Ti 2.729293 -6.919744 1.721729  
Ti -0.620575 -9.599589 -0.736135  
Ti 0.607712 -10.233371 1.949409  
Ti 1.815920 -8.505250 -3.279663  
Ti -2.379663 -6.100451 -1.268220  
Ti 1.702133 -6.214344 -1.294150  
Ti -2.115965 -8.786522 -3.157145  
Ti -0.767456 -5.965654 -3.915549  
O -2.984447 -4.311490 2.538722  
O 4.120001 -10.124221 0.364758  
O 0.993603 -6.332328 0.567969  
O -4.027488 -6.762698 -0.959804  
O -1.085130 -10.225582 -2.357911  
O 0.033367 -4.629520 2.338346  
O -0.570088 -8.628932 1.498526  
O 2.232585 -6.741884 -3.061264  
O 2.188208 -10.805364 2.845674  
O 1.313170 -7.082341 3.049475  
O -1.917454 -5.774363 0.716881

O 3.299155 -9.330324 -2.484275  
O -2.399010 -6.622392 -3.294680  
O -5.336810 -9.013871 0.333176  
O -0.459681 -6.610524 -5.687664  
O -0.177247 -7.946188 -3.521131  
O 2.260032 -4.555343 -0.908490  
O -2.441877 -10.175981 0.151502  
O 0.390925 -10.883656 0.257200  
O -3.193347 -7.980205 1.302496  
O 1.501003 -9.030890 -5.079761  
O 1.625680 -2.380517 0.960289  
O -0.189899 -3.824372 -0.113986  
O -1.870408 -9.214578 -4.975541  
O -2.457419 -4.225316 -1.603495  
O -1.726512 -6.755556 3.279618  
O -0.983014 -10.829680 2.745161  
O -3.895381 -9.872020 2.869198  
O 3.282108 -7.207716 -0.356405  
O -1.395197 -2.068342 1.296001  
O -0.157647 -5.679277 -1.995246  
O -3.769834 -9.214695 -2.427269

**Isoniazid-Bind O**

77

C -1.573449 1.074236 2.121863  
H -1.511084 -0.029635 1.982603  
C -1.813085 3.802294 2.522594  
H -1.919714 4.893188 2.716485  
C -0.805435 1.956175 1.320872  
C -0.924582 3.354531 1.521160  
H -0.330257 4.081894 0.928452  
C -2.435804 1.652156 3.080578  
N -2.557640 2.977810 3.287604  
H -3.063854 0.989781 3.718307  
N 0.578387 2.133701 -0.691743  
H 0.476259 3.149874 -0.651239  
N 1.508050 1.623688 -1.608841  
H 1.029907 1.540323 -2.524895  
H 1.656212 0.641808 -1.310468  
C 0.077813 1.366766 0.286035  
O 0.382246 0.124358 0.298362  
O -0.799189 -4.123870 -3.950920  
O -4.840089 -6.808855 2.860086  
O 2.987997 -5.065984 1.815567  
O 2.041263 -8.870297 1.193362  
Ti -1.483051 -3.909445 1.446572  
Ti -3.152859 -6.115177 2.304128  
Ti -4.827104 -8.506477 2.094609  
O 4.025144 -7.977272 2.564305  
O 1.108621 -8.617808 -1.348216  
Ti -0.775319 -3.698813 -2.116912  
Ti 1.603021 -4.219596 0.877241  
O -0.350729 -1.884827 -1.784639  
O -1.737275 -7.995929 -1.153244  
Ti -3.754151 -8.644958 -0.624315



Ti -2.206066 -9.692528 1.975054  
 Ti 3.507251 -9.694479 2.062092  
 Ti -0.192644 -6.652896 2.137775  
 Ti -0.233552 -8.408819 -5.356973  
 Ti 2.982127 -9.003680 -0.682834  
 Ti 0.042631 -1.849635 0.056585  
 Ti 2.725100 -6.893581 1.723765  
 Ti -0.614963 -9.589387 -0.724134  
 Ti 0.631830 -10.210349 1.962793  
 Ti 1.815831 -8.506167 -3.274418  
 Ti -2.378929 -6.094694 -1.269406  
 Ti 1.703783 -6.213612 -1.304970  
 Ti -2.112790 -8.782356 -3.144615  
 Ti -0.774612 -5.970188 -3.925942  
 O -2.988520 -4.262796 2.476996  
 O 4.138019 -10.081304 0.376603  
 O 0.994960 -6.311157 0.563538  
 O -4.022611 -6.750968 -0.934112  
 O -1.074261 -10.215186 -2.346525  
 O 0.035884 -4.578337 2.314709  
 O -0.554924 -8.600819 1.516987  
 O 2.238051 -6.743049 -3.067399  
 O 2.215296 -10.787798 2.848591  
 O 1.310777 -7.035880 3.048697  
 O -1.899426 -5.765439 0.710170  
 O 3.295451 -9.330870 -2.474171  
 O -2.404222 -6.624976 -3.291120  
 O -5.316204 -9.011995 0.364032  
 O -0.461254 -6.620797 -5.692612  
 O -0.175774 -7.942310 -3.519186  
 O 2.262705 -4.552092 -0.930482  
 O -2.421797 -10.158755 0.177545  
 O 0.412197 -10.861183 0.269042  
 O -3.181437 -7.960413 1.322144  
 O 1.499764 -9.040063 -5.071580  
 O 1.653079 -2.361865 0.883230  
 O -0.185748 -3.811815 -0.150451  
 O -1.872284 -9.215938 -4.962296  
 O -2.455872 -4.217191 -1.612701  
 O -1.728008 -6.703434 3.280605  
 O -0.957583 -10.802441 2.763360  
 O -3.868779 -9.849343 2.898993  
 O 3.284687 -7.187058 -0.358582  
 O -1.388837 -2.029675 1.226152  
 O -0.156262 -5.669971 -2.015655  
 O -3.758634 -9.213113 -2.396112

#### Isoniazid-Bind N

77

C 0.267545 1.997840 -1.830386  
 H 0.004447 2.439834 -2.814026  
 C 0.938457 0.813126 0.583978  
 H 1.207217 0.284661 1.523522  
 C 1.332551 2.554213 -1.080661  
 C 1.643239 1.959061 0.171606

H 2.458251 2.338713 0.817262  
C -0.386562 0.852157 -1.337795  
N -0.047910 0.257946 -0.162629  
H -1.175820 0.338186 -1.927781  
N 3.088566 4.225043 -0.878403  
H 3.391937 3.661457 -0.082077  
N 4.104255 5.046818 -1.408751  
H 3.872622 6.025282 -1.156743  
H 3.936728 5.023071 -2.435920  
C 2.118782 3.697342 -1.694091  
O 1.908504 4.110998 -2.857027  
O -1.204377 -4.257748 -3.917087  
O -4.992976 -7.221946 2.885816  
O 2.679752 -4.944352 1.815049  
O 2.033977 -8.803714 1.198650  
Ti -1.838184 -4.092547 1.499473  
Ti -3.360117 -6.411942 2.334463  
Ti -4.848381 -8.921305 2.143945  
O 3.941220 -7.762356 2.565238  
O 1.064114 -8.617454 -1.324481  
Ti -1.214784 -3.843141 -2.079002  
Ti 1.245262 -4.193496 0.874877  
O -1.004361 -2.002837 -1.733928  
O -1.825797 -8.205079 -1.105092  
Ti -3.790965 -8.996803 -0.575216  
Ti -2.147386 -9.932308 2.017345  
Ti 3.561196 -9.515103 2.066600  
Ti -0.369086 -6.753561 2.153387  
Ti -0.332087 -8.499511 -5.334768  
Ti 2.969433 -8.884220 -0.680749  
Ti -0.513854 -1.921805 0.091056  
Ti 2.555841 -6.790300 1.725265  
Ti -0.578514 -9.718189 -0.692853  
Ti 0.728553 -10.239150 1.976078  
Ti 1.732544 -8.487433 -3.264762  
Ti -2.608957 -6.362586 -1.238108  
Ti 1.486968 -6.196665 -1.299477  
Ti -2.147651 -9.003267 -3.099992  
Ti -1.011226 -6.092416 -3.903551  
O -3.302376 -4.556096 2.544116  
O 4.214709 -9.858722 0.380359  
O 0.782728 -6.324706 0.571676  
O -4.200843 -7.130712 -0.891269  
O -0.993084 -10.359995 -2.321035  
O -0.279303 -4.666886 2.339470  
O -0.578539 -8.725093 1.538872  
O 2.047014 -6.701813 -3.062539  
O 2.350892 -10.694362 2.858791  
O 1.164907 -7.032079 3.055852  
O -2.139635 -5.966790 0.747580  
O 3.273778 -9.212099 -2.473031  
O -2.583740 -6.882871 -3.256302  
O -5.324505 -9.455496 0.422384  
O -0.664890 -6.725036 -5.669744

O -0.284306 -8.030098 -3.497167  
O 1.934210 -4.498391 -0.915833  
O -2.339036 -10.410605 0.223186  
O 0.560928 -10.901185 0.280214  
O -3.253360 -8.268111 1.361018  
O 1.431351 -9.038314 -5.061069  
O 1.143186 -2.322494 0.904935  
O -0.579972 -3.906011 -0.128323  
O -1.910998 -9.411674 -4.925957  
O -2.843573 -4.504804 -1.584235  
O -1.893796 -6.918305 3.297865  
O -0.807047 -10.960974 2.772057  
O -3.786538 -10.184893 2.958969  
O 3.138122 -7.046312 -0.360488  
O -1.841365 -2.186795 1.310686  
O -0.402625 -5.755754 -2.003626  
O -3.756533 -9.553342 -2.347903

#### **Anti-virals**

##### **Favipiravir**

75

N -2.130855 0.901238 1.544970  
N -2.261815 3.689339 2.244296  
C -1.340245 1.832130 0.948938  
C -1.441622 3.221113 1.284862  
O -0.662640 4.153651 0.628283  
H -0.916803 5.022400 1.039599  
C -2.970867 1.390930 2.439953  
C -3.038444 2.763616 2.828191  
F -3.838571 0.515740 3.046846  
H -3.742108 3.082819 3.629862  
N 0.049990 2.141871 -1.051237  
H -0.185936 3.141028 -1.005153  
H 0.801514 1.816122 -1.669643  
C -0.315841 1.330801 -0.044470  
O 0.199749 0.179460 0.063866  
O -0.853007 -4.148623 -4.018738  
O -4.855248 -6.802073 2.848684  
O 2.969924 -5.063524 1.760145  
O 2.042392 -8.882235 1.190541  
Ti -1.497574 -3.908709 1.407415  
Ti -3.175012 -6.095435 2.288383  
Ti -4.816261 -8.505175 2.102283  
O 4.017411 -7.959314 2.559860  
O 1.109777 -8.644553 -1.345252  
Ti -0.800743 -3.714179 -2.181212  
Ti 1.591293 -4.222187 0.804832  
O -0.416050 -1.907197 -1.847332  
O -1.734616 -8.011676 -1.148678  
Ti -3.745394 -8.661012 -0.609352  
Ti -2.203711 -9.708901 1.993081  
Ti 3.507652 -9.680641 2.075845  
Ti -0.205844 -6.643722 2.117851  
Ti -0.231394 -8.456406 -5.375448  
Ti 2.992808 -9.030492 -0.681756

Ti 0.010571 -1.861141 -0.002972  
Ti 2.710762 -6.892740 1.698865  
Ti -0.603530 -9.614727 -0.707717  
Ti 0.633532 -10.219101 1.986169  
Ti 1.802892 -8.581496 -3.280119  
Ti -2.396743 -6.107075 -1.295919  
Ti 1.689023 -6.264531 -1.336938  
Ti -2.099567 -8.802685 -3.128174  
Ti -0.797773 -5.992520 -3.982983  
O -3.011970 -4.249175 2.447016  
O 4.158385 -10.077318 0.400418  
O 0.974956 -6.325929 0.530926  
O -4.033969 -6.776685 -0.948991  
O -1.049546 -10.236704 -2.334220  
O 0.030041 -4.576000 2.259069  
O -0.553781 -8.614700 1.544259  
O 2.258045 -6.826878 -3.075807  
O 2.221418 -10.782010 2.868672  
O 1.301521 -7.023349 3.026647  
O -1.926632 -5.766222 0.680779  
O 3.274821 -9.416263 -2.467476  
O -2.415970 -6.660141 -3.317852  
O -5.311474 -9.020777 0.377421  
O -0.456892 -6.669630 -5.736408  
O -0.170199 -7.959542 -3.543266  
O 2.262086 -4.601867 -0.979257  
O -2.413651 -10.170213 0.194623  
O 0.424744 -10.877509 0.292382  
O -3.174721 -7.966371 1.333601  
O 1.483411 -9.124994 -5.074373  
O 1.638162 -2.354988 0.794352  
O -0.206047 -3.820341 -0.209828  
O -1.869820 -9.245561 -4.952388  
O -2.476385 -4.238390 -1.655362  
O -1.739063 -6.665531 3.262060  
O -0.954547 -10.826272 2.775476  
O -3.858388 -9.844596 2.927774  
O 3.280580 -7.213991 -0.369038  
O -1.366902 -2.046754 1.209947  
O -0.151109 -5.677440 -2.082333  
O -3.743756 -9.239101 -2.378292

### Chloroquine

108  
C -0.126903 3.121896 -0.454887  
N 0.056123 0.266048 -0.065872  
C -0.048086 2.554005 0.889367  
C 0.049880 1.118872 1.030491  
C -0.058062 2.210842 -1.544971  
C 0.016690 0.829621 -1.295991  
H -0.103386 2.573399 -2.583527  
H 0.018663 0.114707 -2.145356  
N -0.250267 4.459516 -0.635130  
C -1.738282 4.922982 -2.580324  
C 0.091843 9.034504 -2.435978

C -0.763772 9.934068 -4.533277  
C 1.160925 12.245555 -4.115239  
H 0.421528 12.400669 -4.932038  
H -1.683334 9.488741 -4.066506  
H -1.021909 10.985613 -4.797798  
H -0.187177 8.095992 -5.590235  
H 0.536769 9.601070 -6.255705  
H -1.918460 3.839917 -2.751239  
H -1.788992 5.445451 -3.558409  
H -2.551226 5.316830 -1.929485  
H -0.333658 5.038500 0.201842  
C -0.366750 5.167973 -1.917932  
H 0.447615 4.794435 -2.592392  
C -0.018368 7.557715 -2.855539  
H 0.797663 6.769297 -1.003668  
H -0.981036 7.022154 -0.977959  
C -0.132647 6.661712 -1.615309  
H 0.931362 9.146296 -1.706353  
H -0.856385 9.310455 -1.878979  
N 0.347156 9.950080 -3.548532  
C -0.388242 9.167248 -5.813574  
H -1.203602 9.217992 -6.571649  
C 0.605474 11.308348 -3.033583  
H 1.345845 11.206426 -2.202933  
H -0.323414 11.758751 -2.571717  
H 2.082490 11.816958 -4.570822  
H 1.401611 13.245107 -3.689901  
H 0.872950 7.269100 -3.462854  
H -0.909696 7.420817 -3.510958  
C -0.060594 3.361570 2.070332  
C 0.139059 0.545849 2.339773  
H 0.210976 -0.557277 2.449331  
H -0.132925 4.464108 1.992460  
C 0.025873 2.795335 3.346856  
C 0.128358 1.373204 3.473504  
H 0.018861 3.431962 4.255072  
Cl 0.240840 0.666226 5.079486  
O -0.850432 -4.248716 -3.969482  
O -4.849750 -6.924240 2.846585  
O 2.965675 -5.112162 1.765803  
O 2.049298 -8.934961 1.206001  
Ti -1.500380 -3.990676 1.430318  
Ti -3.169545 -6.205969 2.290240  
Ti -4.803249 -8.627588 2.101899  
O 4.028255 -7.996561 2.561533  
O 1.121645 -8.715007 -1.342845  
Ti -0.801906 -3.817194 -2.130842  
Ti 1.573231 -4.290899 0.821335  
O -0.366739 -2.013691 -1.831577  
O -1.731584 -8.114353 -1.147060  
Ti -3.727365 -8.786464 -0.611497  
Ti -2.179197 -9.806567 1.995238  
Ti 3.518521 -9.723755 2.090741  
Ti -0.205760 -6.724202 2.127414

Ti -0.213541 -8.517896 -5.365783  
 Ti 2.998105 -9.093044 -0.671296  
 Ti -0.001514 -1.908620 0.025240  
 Ti 2.710614 -6.940813 1.706870  
 Ti -0.588936 -9.696848 -0.719410  
 Ti 0.658913 -10.298918 1.981560  
 Ti 1.818438 -8.617169 -3.273022  
 Ti -2.400962 -6.213572 -1.271186  
 Ti 1.694808 -6.315250 -1.321815  
 Ti -2.095592 -8.902153 -3.140539  
 Ti -0.796273 -6.087755 -3.939296  
 O -3.024555 -4.356799 2.447101  
 O 4.160930 -10.141389 0.417638  
 O 0.978868 -6.387926 0.543876  
 O -4.033544 -6.895406 -0.935148  
 O -1.036495 -10.327630 -2.342156  
 O 0.016592 -4.655267 2.291635  
 O -0.541437 -8.700195 1.556562  
 O 2.250562 -6.858766 -3.070687  
 O 2.244729 -10.842568 2.877055  
 O 1.308849 -7.071811 3.038697  
 O -1.912534 -5.861952 0.702140  
 O 3.299880 -9.441778 -2.460088  
 O -2.416480 -6.760664 -3.292194  
 O -5.285127 -9.160500 0.376353  
 O -0.455841 -6.735418 -5.707097  
 O -0.165190 -8.046595 -3.527924  
 O 2.245322 -4.642787 -0.965285  
 O -2.381884 -10.271169 0.193192  
 O 0.459115 -10.944899 0.281729  
 O -3.163650 -8.073158 1.334263  
 O 1.515274 -9.155140 -5.071482  
 O 1.595213 -2.415047 0.851250  
 O -0.231181 -3.917693 -0.171726  
 O -1.848530 -9.333857 -4.961734  
 O -2.485455 -4.345322 -1.631543  
 O -1.735139 -6.763008 3.273571  
 O -0.927949 -10.930422 2.760467  
 O -3.835098 -9.954976 2.930675  
 O 3.278205 -7.267314 -0.364100  
 O -1.365210 -2.108136 1.244898  
 O -0.156669 -5.776837 -2.041489  
 O -3.731655 -9.354993 -2.385004

### Hydroxychloroquine

109

C -0.125383 3.125565 -0.452196  
 N 0.057421 0.273395 -0.060982  
 C -0.230137 2.549341 0.884982  
 C -0.117158 1.116004 1.031221  
 C 0.124297 2.229106 -1.527270  
 C 0.184042 0.847050 -1.279831  
 H 0.221229 2.600457 -2.558879  
 H 0.310208 0.143844 -2.129360  
 N -0.251852 4.461825 -0.640893

C -1.538045 4.843566 -2.743190  
C 0.029444 9.042284 -2.444498  
C -0.690792 9.929630 -4.610248  
C 1.223195 12.264787 -4.065125  
O 0.273126 12.875754 -4.968856  
H 0.027187 12.177353 -5.617373  
H -1.394381 9.089514 -4.412647  
H -1.299109 10.869961 -4.569833  
H 0.553235 8.810810 -6.008406  
H 0.617107 10.575349 -6.271868  
H -1.647046 3.752350 -2.920606  
H -1.504330 5.355235 -3.727499  
H -2.436657 5.201619 -2.191817  
H -0.505430 5.027823 0.170375  
C -0.262367 5.159375 -1.935045  
H 0.639018 4.825509 -2.512282  
C 0.058046 7.558403 -2.853447  
H 0.714152 6.821575 -0.916349  
H -1.067332 6.980204 -1.082533  
C -0.138000 6.663406 -1.623050  
H 0.792272 9.212576 -1.645715  
H -0.976153 9.264308 -1.973407  
N 0.346428 9.952480 -3.547320  
C -0.066013 9.734981 -6.004102  
H -0.843544 9.655026 -6.798349  
C 0.583741 11.312515 -3.035289  
H 1.272588 11.216188 -2.161482  
H -0.366868 11.790872 -2.660026  
H 2.015025 11.711373 -4.630931  
H 1.709041 13.113682 -3.528021  
H 1.028170 7.326342 -3.356031  
H -0.745081 7.356780 -3.600195  
C -0.441101 3.348410 2.052951  
C -0.197556 0.538406 2.339334  
H -0.117968 -0.562700 2.454404  
H -0.533944 4.448771 1.967375  
C -0.529364 2.776411 3.326430  
C -0.400123 1.357327 3.461066  
H -0.693516 3.404900 4.225538  
Cl -0.505593 0.640923 5.063610  
O -0.842022 -4.245497 -4.014242  
O -4.851928 -6.824920 2.845175  
O 2.970300 -5.072359 1.756158  
O 2.053217 -8.887340 1.203602  
Ti -1.496189 -3.939450 1.402068  
Ti -3.168684 -6.120918 2.290570  
Ti -4.814063 -8.530665 2.103494  
O 4.036544 -7.960589 2.556472  
O 1.115306 -8.675613 -1.339227  
Ti -0.787566 -3.801518 -2.177319  
Ti 1.583432 -4.248079 0.802954  
O -0.350085 -1.992209 -1.881205  
O -1.740064 -8.067936 -1.143108  
Ti -3.748417 -8.712361 -0.607726

Ti -2.200353 -9.727055 2.006995  
 Ti 3.518875 -9.689250 2.093059  
 Ti -0.198743 -6.681672 2.125789  
 Ti -0.216949 -8.528602 -5.374116  
 Ti 2.994215 -9.076507 -0.671682  
 Ti 0.000527 -1.889531 -0.026060  
 Ti 2.721710 -6.904851 1.700735  
 Ti -0.600877 -9.645843 -0.698386  
 Ti 0.643743 -10.215087 2.000075  
 Ti 1.812142 -8.611604 -3.272626  
 Ti -2.397204 -6.173953 -1.295044  
 Ti 1.692992 -6.303132 -1.328813  
 Ti -2.100079 -8.889210 -3.137727  
 Ti -0.795353 -6.084246 -3.973350  
 O -2.999539 -4.275714 2.455528  
 O 4.149718 -10.127988 0.419580  
 O 0.981858 -6.356757 0.539056  
 O -4.040014 -6.835700 -0.959213  
 O -1.042863 -10.295443 -2.316237  
 O 0.023574 -4.608308 2.261878  
 O -0.551393 -8.631444 1.540859  
 O 2.253413 -6.855900 -3.077102  
 O 2.229667 -10.764617 2.902393  
 O 1.312642 -7.042922 3.034637  
 O -1.940114 -5.790957 0.680227  
 O 3.283719 -9.446931 -2.457313  
 O -2.414189 -6.748848 -3.316808  
 O -5.311870 -9.062700 0.382703  
 O -0.457344 -6.748236 -5.734596  
 O -0.169074 -8.039374 -3.539005  
 O 2.250761 -4.629668 -0.981174  
 O -2.403369 -10.218626 0.221047  
 O 0.445607 -10.886152 0.312582  
 O -3.173802 -7.995640 1.331245  
 O 1.511009 -9.158319 -5.071040  
 O 1.594177 -2.374371 0.829703  
 O -0.220613 -3.885417 -0.209314  
 O -1.852860 -9.339596 -4.954283  
 O -2.472532 -4.311310 -1.672894  
 O -1.736503 -6.705506 3.262867  
 O -0.941815 -10.831727 2.791702  
 O -3.856807 -9.861229 2.939904  
 O 3.283756 -7.249392 -0.371841  
 O -1.389911 -2.064322 1.168243  
 O -0.156555 -5.759531 -2.066562  
 O -3.737740 -9.321508 -2.369225

#### Anti-parasites

##### Aminoquinoline

79

C -0.055829 3.142829 -0.041843  
 N 0.054115 0.271917 -0.043238  
 C 0.119388 2.418290 1.202650  
 C 0.181414 0.975551 1.150973  
 C -0.165607 2.389184 -1.234512



C -0.114997 0.978210 -1.178753  
H -0.303971 2.898761 -2.209471  
H -0.230318 0.375966 -2.107796  
N -0.052937 4.519602 -0.055576  
H -0.312718 4.989006 0.814983  
H -0.474382 4.950983 -0.882712  
C 0.226121 3.084489 2.464958  
C 0.370014 0.253147 2.376613  
H 0.437132 -0.855184 2.348190  
H 0.178316 4.191969 2.505064  
C 0.394085 2.356501 3.649966  
C 0.471794 0.930163 3.598298  
H 0.472567 2.885755 4.622468  
H 0.612799 0.347575 4.532398  
O -0.896994 -4.227789 -3.993162  
O -4.861926 -6.941851 2.788104  
O 2.939949 -5.058033 1.749388  
O 2.059637 -8.889049 1.181929  
Ti -1.527812 -3.991225 1.405150  
Ti -3.176577 -6.223754 2.256480  
Ti -4.797837 -8.650988 2.046591  
O 4.031679 -7.956773 2.544472  
O 1.125592 -8.684528 -1.370754  
Ti -0.872418 -3.805586 -2.157131  
Ti 1.541456 -4.245549 0.800402  
O -0.480680 -1.981197 -1.867258  
O -1.727294 -8.125200 -1.185347  
Ti -3.729139 -8.798468 -0.674752  
Ti -2.165481 -9.800148 1.946008  
Ti 3.531601 -9.686607 2.059365  
Ti -0.211452 -6.731476 2.099935  
Ti -0.191317 -8.493876 -5.395720  
Ti 2.998990 -9.056425 -0.692579  
Ti -0.066356 -1.901355 -0.035794  
Ti 2.713514 -6.895698 1.694521  
Ti -0.574231 -9.695894 -0.767041  
Ti 0.677128 -10.253331 1.944051  
Ti 1.837975 -8.583939 -3.298002  
Ti -2.402593 -6.231286 -1.301854  
Ti 1.703797 -6.284575 -1.334139  
Ti -2.070608 -8.902488 -3.190594  
Ti -0.787990 -6.066921 -3.957225  
O -3.020111 -4.379320 2.452560  
O 4.161070 -10.112057 0.381758  
O 0.981673 -6.367511 0.525321  
O -4.038416 -6.914465 -0.987935  
O -1.003817 -10.327444 -2.390566  
O -0.005535 -4.634463 2.260797  
O -0.535661 -8.674554 1.502888  
O 2.249237 -6.820228 -3.091874  
O 2.258061 -10.788225 2.858583  
O 1.304794 -7.057299 3.015413  
O -1.926183 -5.864672 0.673892  
O 3.316907 -9.399655 -2.480055

O -2.401238 -6.771062 -3.323130  
O -5.280241 -9.191396 0.323934  
O -0.438477 -6.707608 -5.723509  
O -0.152935 -8.036991 -3.554350  
O 2.236022 -4.608793 -0.981176  
O -2.363543 -10.282567 0.151220  
O 0.483119 -10.923143 0.254945  
O -3.169694 -8.081736 1.279781  
O 1.539402 -9.117669 -5.099272  
O 1.550273 -2.371550 0.793202  
O -0.255812 -3.902425 -0.215094  
O -1.828628 -9.315638 -5.009696  
O -2.538536 -4.361941 -1.642175  
O -1.742147 -6.795462 3.237825  
O -0.896808 -10.879814 2.747988  
O -3.819694 -9.969081 2.878096  
O 3.287960 -7.228737 -0.382776  
O -1.426113 -2.111830 1.189750  
O -0.169579 -5.753327 -2.062262  
O -3.713050 -9.368973 -2.446276

**Metronidazole**

81

C -0.165547 2.872604 -0.662184  
C -0.162832 2.250515 0.620410  
N -0.034564 0.895603 0.927121  
O 0.107107 0.152832 -0.113145  
O -0.034413 0.460335 2.088650  
N -0.255117 4.215544 -0.532115  
N -0.250000 3.286305 1.549101  
C -0.327385 3.147552 3.008194  
C -1.666989 2.504731 3.464651  
H -2.413267 3.300423 3.696302  
H -2.081795 1.885283 2.627195  
O -1.490168 1.743829 4.662255  
H -1.007551 0.927819 4.379666  
C -0.310548 4.442731 0.815691  
C -0.409312 5.807319 1.425345  
H -0.900967 5.786224 2.419636  
H -0.986466 6.471235 0.748677  
H 0.602619 6.259911 1.562153  
H -0.105661 2.354605 -1.638324  
H 0.512003 2.504889 3.355977  
H -0.191679 4.155978 3.445379  
O -0.855960 -4.253741 -4.025117  
O -4.857215 -6.905028 2.851528  
O 2.971230 -5.120289 1.763822  
O 2.045008 -8.932511 1.206881  
Ti -1.516698 -4.000354 1.401046  
Ti -3.179578 -6.194446 2.290387  
Ti -4.819442 -8.606988 2.102850  
O 4.025914 -8.003457 2.562696  
O 1.114202 -8.712825 -1.334689  
Ti -0.797764 -3.818544 -2.190460  
Ti 1.582124 -4.305382 0.810461

O -0.371291 -2.017482 -1.863560  
 O -1.738239 -8.097725 -1.145507  
 Ti -3.747304 -8.759019 -0.608855  
 Ti -2.202227 -9.791669 1.996076  
 Ti 3.508807 -9.731607 2.095774  
 Ti -0.206183 -6.723909 2.116917  
 Ti -0.220676 -8.563563 -5.365805  
 Ti 2.995999 -9.100307 -0.668210  
 Ti -0.005557 -1.973638 -0.020230  
 Ti 2.712663 -6.946844 1.706311  
 Ti -0.597779 -9.683560 -0.699941  
 Ti 0.637450 -10.280626 1.995821  
 Ti 1.806752 -8.662766 -3.266232  
 Ti -2.403899 -6.202980 -1.299627  
 Ti 1.693841 -6.336416 -1.335198  
 Ti -2.098660 -8.902519 -3.127577  
 Ti -0.798149 -6.096223 -3.986077  
 O -3.022324 -4.344821 2.447377  
 O 4.150037 -10.152809 0.421691  
 O 0.976965 -6.400008 0.534941  
 O -4.039553 -6.874887 -0.949535  
 O -1.041062 -10.320829 -2.322501  
 O 0.007358 -4.653366 2.261777  
 O -0.553771 -8.690100 1.542334  
 O 2.258676 -6.906940 -3.072461  
 O 2.223517 -10.814588 2.903811  
 O 1.300926 -7.071374 3.036248  
 O -1.936217 -5.853764 0.680545  
 O 3.281673 -9.489185 -2.451373  
 O -2.417470 -6.760829 -3.319438  
 O -5.311108 -9.123764 0.376996  
 O -0.453986 -6.780052 -5.735484  
 O -0.168636 -8.056859 -3.536886  
 O 2.251761 -4.666409 -0.976592  
 O -2.403016 -10.262871 0.201066  
 O 0.444138 -10.937407 0.301761  
 O -3.178355 -8.061098 1.333794  
 O 1.495915 -9.221762 -5.057643  
 O 1.606698 -2.440535 0.824307  
 O -0.220211 -3.923052 -0.207934  
 O -1.860856 -9.354020 -4.946205  
 O -2.476068 -4.335102 -1.661744  
 O -1.740910 -6.756404 3.261660  
 O -0.947300 -10.897234 2.783839  
 O -3.857842 -9.942709 2.926803  
 O 3.280993 -7.276106 -0.364054  
 O -1.420429 -2.124186 1.156879  
 O -0.152065 -5.773183 -2.083499  
 O -3.741415 -9.341539 -2.374980

#### **Amodiaquinine**

107

C -0.487569 6.237312 2.255597  
 N 0.236913 8.897965 1.356124  
 C -1.247361 6.886330 1.216245

C -0.822031 8.214463 0.797133  
C 0.567030 6.962481 2.832853  
C 0.873232 8.275611 2.347271  
H 1.173299 6.510007 3.644727  
H 1.724017 8.825909 2.810810  
N -0.841033 4.942738 2.741262  
C 0.522517 0.110678 3.025885  
C -1.333383 0.006047 4.588497  
C 0.664121 -0.896197 6.669406  
H -0.405325 -1.031682 6.944302  
H -1.805842 0.131419 3.585551  
H -1.569048 -1.041762 4.913286  
H -1.724581 2.056467 5.245802  
H -1.492826 0.887418 6.594176  
H -0.573219 4.852977 3.728358  
C -0.458731 3.756206 2.053676  
C 0.187015 1.367627 2.231523  
H -0.283563 2.617176 3.932481  
C -0.199575 2.587341 2.829670  
H 1.627123 -0.062028 2.970293  
H 0.059271 -0.774190 2.500003  
N 0.146543 0.155577 4.441543  
C -1.932651 1.015771 5.581780  
H -3.036131 0.891344 5.661786  
C 0.855025 -0.937833 5.148094  
H 1.939041 -0.847640 4.895233  
H 0.513344 -1.940278 4.753638  
H 1.003999 0.077295 7.090231  
H 1.242635 -1.713866 7.154194  
C -2.409840 6.295896 0.620982  
C -1.557024 8.874510 -0.246692  
H -1.223404 9.882990 -0.570622  
H -2.740792 5.300172 0.976720  
C -3.119075 6.961451 -0.381882  
C -2.675682 8.254351 -0.821432  
H -4.024866 6.508980 -0.837027  
Cl -3.583409 9.069032 -2.096744  
C -0.323165 3.692437 0.638092  
H -0.509298 4.589814 0.019036  
C 0.328140 1.349271 0.818911  
C 0.074913 2.483858 0.023503  
H 0.215471 2.428393 -1.075333  
O 0.793174 0.159349 0.167039  
H 1.559408 -0.224715 0.677404  
O -0.937962 -4.247065 -4.100647  
O -4.855442 -6.803383 2.798737  
O 2.923464 -4.923320 1.660740  
O 2.044958 -8.783589 1.194504  
Ti -1.575962 -3.853384 1.285691  
Ti -3.190169 -6.088995 2.210319  
Ti -4.804325 -8.530262 2.103015  
O 3.998728 -7.780142 2.541389  
O 1.125734 -8.683049 -1.357722  
Ti -0.892042 -3.758458 -2.286795

Ti 1.521742 -4.119141 0.704851  
 O -0.554390 -1.906194 -1.997890  
 O -1.729926 -8.058449 -1.156756  
 Ti -3.727935 -8.728371 -0.606782  
 Ti -2.171579 -9.691402 2.012808  
 Ti 3.519748 -9.530912 2.100124  
 Ti -0.228407 -6.586150 2.026520  
 Ti -0.219763 -8.571722 -5.372816  
 Ti 3.004407 -8.975686 -0.680847  
 Ti -0.119499 -1.806836 -0.204056  
 Ti 2.696276 -6.757030 1.638009  
 Ti -0.587393 -9.636390 -0.701155  
 Ti 0.678288 -10.151913 2.000076  
 Ti 1.815604 -8.594560 -3.283982  
 Ti -2.408954 -6.177762 -1.335761  
 Ti 1.689650 -6.202564 -1.400235  
 Ti -2.097600 -8.895175 -3.136690  
 Ti -0.804922 -6.089439 -4.012984  
 O -3.060202 -4.222060 2.331503  
 O 4.179411 -9.968682 0.439631  
 O 0.948929 -6.254800 0.452660  
 O -4.037802 -6.842797 -0.962240  
 O -1.042734 -10.298176 -2.308225  
 O -0.043231 -4.456373 2.153262  
 O -0.542418 -8.574140 1.536410  
 O 2.208923 -6.816737 -3.139341  
 O 2.266185 -10.656205 2.908395  
 O 1.278336 -6.866415 2.961196  
 O -1.927889 -5.755157 0.618894  
 O 3.334309 -9.337251 -2.458773  
 O -2.419554 -6.760239 -3.344431  
 O -5.278142 -9.106794 0.393142  
 O -0.453194 -6.792855 -5.754104  
 O -0.175012 -8.047664 -3.545058  
 O 2.220702 -4.525425 -1.074166  
 O -2.375684 -10.195382 0.226024  
 O 0.464753 -10.854185 0.328862  
 O -3.166037 -7.976862 1.318482  
 O 1.504199 -9.206567 -5.056619  
 O 1.553198 -2.262406 0.651508  
 O -0.259120 -3.775916 -0.327868  
 O -1.859324 -9.364233 -4.947628  
 O -2.539789 -4.312896 -1.735640  
 O -1.748750 -6.599959 3.197936  
 O -0.900868 -10.767993 2.811259  
 O -3.825117 -9.834246 2.950471  
 O 3.258838 -7.134181 -0.416988  
 O -1.515258 -1.962223 0.966629  
 O -0.179470 -5.692538 -2.132657  
 O -3.735255 -9.326048 -2.365351

# Industry

## Biotinidase

70

C 0.126789 1.575709 0.088494

O 0.058010 2.243132 -1.091675  
O 0.055458 2.369421 1.188837  
C -0.051138 3.682415 -0.802216  
C -0.055696 3.767282 0.743333  
O 0.255819 0.345628 0.166241  
H 0.822086 4.192391 -1.268689  
H -0.990630 4.055607 -1.268564  
H 0.813296 4.327721 1.156631  
H -0.998819 4.187068 1.160661  
O -0.847646 -4.106502 -3.977484  
O -4.861585 -6.780819 2.784371  
O 2.960994 -4.966126 1.796724  
O 2.050465 -8.789995 1.203636  
Ti -1.505980 -3.833780 1.413779  
Ti -3.179895 -6.065655 2.242288  
Ti -4.805972 -8.494448 2.063961  
O 4.020971 -7.859941 2.571609  
O 1.119710 -8.574957 -1.329937  
Ti -0.805065 -3.665222 -2.141954  
Ti 1.588661 -4.127141 0.834310  
O -0.436799 -1.843777 -1.824227  
O -1.741815 -7.975463 -1.160646  
Ti -3.732100 -8.640167 -0.643146  
Ti -2.187452 -9.678638 1.970791  
Ti 3.520685 -9.585568 2.085896  
Ti -0.211034 -6.592522 2.121884  
Ti -0.206242 -8.393132 -5.356202  
Ti 3.000056 -8.940229 -0.668731  
Ti 0.003120 -1.766145 0.001040  
Ti 2.705032 -6.796592 1.722870  
Ti -0.595821 -9.553399 -0.721349  
Ti 0.662008 -10.154516 1.957040  
Ti 1.814345 -8.489167 -3.258527  
Ti -2.398809 -6.075443 -1.291492  
Ti 1.694523 -6.174883 -1.312507  
Ti -2.095997 -8.771922 -3.157651  
Ti -0.785583 -5.944856 -3.945079  
O -3.028719 -4.216159 2.421260  
O 4.164948 -9.988284 0.410279  
O 0.983612 -6.246117 0.554537  
O -4.037838 -6.751140 -0.956529  
O -1.036905 -10.185002 -2.347311  
O 0.005630 -4.513892 2.272984  
O -0.545542 -8.563201 1.522380  
O 2.243705 -6.728199 -3.064071  
O 2.243238 -10.701331 2.864417  
O 1.293870 -6.939964 3.047100  
O -1.907971 -5.710373 0.673688  
O 3.298199 -9.309706 -2.454698  
O -2.408738 -6.620047 -3.306796  
O -5.292111 -9.022785 0.346236  
O -0.444239 -6.608017 -5.702337  
O -0.167242 -7.914774 -3.521295  
O 2.253722 -4.507701 -0.957187

O -2.386799 -10.150063 0.171051  
O 0.459988 -10.808409 0.265126  
O -3.161998 -7.947462 1.302008  
O 1.518534 -9.030073 -5.059017  
O 1.634241 -2.263266 0.803340  
O -0.204642 -3.733625 -0.178653  
O -1.844310 -9.211428 -4.970871  
O -2.478610 -4.201230 -1.630816  
O -1.756963 -6.625577 3.244441  
O -0.923646 -10.778660 2.752006  
O -3.846787 -9.833594 2.889725  
O 3.281198 -7.120556 -0.358792  
O -1.377878 -1.951852 1.204402  
O -0.161478 -5.630276 -2.034992  
O -3.739436 -9.216085 -2.414042

### Thymol

85

C -0.676308 2.433165 2.812818  
C -0.878632 2.508002 4.310773  
H -1.719272 3.190872 4.564999  
H 0.036277 2.904191 4.813361  
H -1.090988 1.505832 4.746376  
C -1.077698 3.498880 1.963790  
H -1.571279 4.385244 2.413736  
C -0.063525 1.305722 2.212329  
H 0.236650 0.430506 2.829015  
C -0.864989 3.444980 0.567149  
C 0.146940 1.282555 0.817182  
H -1.180545 4.294080 -0.068694  
C -0.233942 2.332892 -0.053310  
C -0.014560 2.235750 -1.562034  
H 0.851056 1.544401 -1.723508  
C 0.321644 3.596471 -2.201416  
H 1.234551 4.055000 -1.756404  
H 0.490784 3.466765 -3.293716  
H -0.519223 4.316389 -2.077462  
C -1.254941 1.613585 -2.246092  
H -1.474238 0.590015 -1.864234  
H -2.150775 2.251205 -2.071332  
H -1.091184 1.535531 -3.343902  
O 0.782410 0.134598 0.234924  
H 1.494045 -0.188153 0.848291  
O -0.922897 -4.230407 -4.105855  
O -4.861372 -6.822122 2.751195  
O 2.925040 -4.973139 1.691313  
O 2.047486 -8.814133 1.169339  
Ti -1.576484 -3.892531 1.274324  
Ti -3.191047 -6.107656 2.185726  
Ti -4.806677 -8.543341 2.036222  
O 4.008095 -7.854734 2.524199  
O 1.123125 -8.683024 -1.385497  
Ti -0.888392 -3.755876 -2.285502  
Ti 1.530407 -4.168845 0.727823  
O -0.547590 -1.908092 -1.974824

O -1.733850 -8.066717 -1.207078  
 Ti -3.721101 -8.737611 -0.673799  
 Ti -2.182853 -9.709703 1.954705  
 Ti 3.520049 -9.593658 2.064114  
 Ti -0.220625 -6.619683 2.035699  
 Ti -0.210013 -8.545686 -5.403942  
 Ti 3.002418 -8.992902 -0.701588  
 Ti -0.097729 -1.840767 -0.173322  
 Ti 2.700410 -6.810912 1.641132  
 Ti -0.593048 -9.644058 -0.754651  
 Ti 0.665485 -10.175744 1.949369  
 Ti 1.815283 -8.592767 -3.299107  
 Ti -2.410367 -6.183718 -1.380530  
 Ti 1.689924 -6.219988 -1.403068  
 Ti -2.095927 -8.892457 -3.197968  
 Ti -0.799891 -6.071463 -4.036193  
 O -3.058863 -4.244828 2.325084  
 O 4.161725 -10.029043 0.393025  
 O 0.956901 -6.291388 0.456274  
 O -4.039639 -6.854577 -1.014986  
 O -1.040798 -10.297611 -2.367185  
 O -0.048048 -4.523659 2.147685  
 O -0.546533 -8.594303 1.493419  
 O 2.212969 -6.816992 -3.146527  
 O 2.248620 -10.697020 2.864080  
 O 1.284154 -6.931891 2.965499  
 O -1.942347 -5.769913 0.586003  
 O 3.333678 -9.340498 -2.481692  
 O -2.420317 -6.748552 -3.384782  
 O -5.275107 -9.112767 0.325211  
 O -0.440699 -6.762243 -5.778926  
 O -0.177373 -8.033506 -3.577866  
 O 2.228260 -4.548216 -1.063660  
 O -2.380358 -10.211689 0.160948  
 O 0.458923 -10.867160 0.271520  
 O -3.164763 -7.990540 1.268422  
 O 1.504747 -9.199814 -5.074566  
 O 1.555919 -2.314173 0.697595  
 O -0.249062 -3.799264 -0.330462  
 O -1.853239 -9.343591 -5.009778  
 O -2.539207 -4.310635 -1.744868  
 O -1.756498 -6.634194 3.179681  
 O -0.917284 -10.787608 2.757563  
 O -3.838560 -9.856717 2.882317  
 O 3.262972 -7.155205 -0.422327  
 O -1.480784 -2.001212 1.003588  
 O -0.184618 -5.697432 -2.142300  
 O -3.734820 -9.326651 -2.437691

#### Carvacol

85

C -0.360846 2.392837 -0.152286  
 C -0.543631 2.401347 1.348590  
 H -1.223401 3.227104 1.649787  
 H 0.427105 2.556084 1.877659



H -0.965770 1.437377 1.714137  
C -0.757591 3.482793 -0.970492  
H -1.215387 4.366904 -0.480284  
C 0.220029 1.292139 -0.827840  
O 0.604349 0.148197 -0.042660  
H 1.533640 0.232226 0.280173  
C -0.592078 3.452358 -2.374674  
C 0.381348 1.229908 -2.226347  
H -0.913638 4.321484 -2.981234  
C -0.027013 2.323502 -3.029955  
C 0.090970 2.237846 -4.550493  
H 0.790405 1.389306 -4.766282  
C 0.664608 3.526420 -5.173890  
H 1.656225 3.792180 -4.741207  
H 0.780610 3.402031 -6.274145  
H -0.026089 4.384419 -5.003329  
C -1.280093 1.902861 -5.181632  
H -1.710099 0.968163 -4.755009  
H -2.000781 2.734399 -4.999515  
H -1.178944 1.774726 -6.283137  
H 0.801666 0.314688 -2.693161  
O -0.861564 -4.262126 -4.050360  
O -4.872771 -6.906112 2.766593  
O 2.914917 -4.988160 1.722063  
O 2.046236 -8.828514 1.204398  
Ti -1.591004 -3.922887 1.338614  
Ti -3.202028 -6.181870 2.214042  
Ti -4.805811 -8.623345 2.046246  
O 4.006646 -7.864370 2.560082  
O 1.122136 -8.689162 -1.354131  
Ti -0.894091 -3.792392 -2.230216  
Ti 1.504681 -4.198091 0.779954  
O -0.548238 -1.953480 -1.927533  
O -1.739500 -8.111207 -1.190043  
Ti -3.719886 -8.792451 -0.663753  
Ti -2.176296 -9.775459 1.970176  
Ti 3.519674 -9.607328 2.094591  
Ti -0.235457 -6.658436 2.083311  
Ti -0.205019 -8.578901 -5.376214  
Ti 3.001878 -8.990137 -0.670781  
Ti -0.107964 -1.881463 -0.106432  
Ti 2.693461 -6.827328 1.689418  
Ti -0.590065 -9.683747 -0.737103  
Ti 0.672072 -10.214344 1.967395  
Ti 1.819343 -8.597058 -3.272442  
Ti -2.409879 -6.212784 -1.335831  
Ti 1.630436 -6.252082 -1.354748  
Ti -2.095914 -8.929485 -3.177165  
Ti -0.803152 -6.111110 -4.002613  
O -3.086244 -4.319915 2.360423  
O 4.164970 -10.030320 0.426654  
O 0.939610 -6.315142 0.510963  
O -4.038451 -6.912811 -0.993903  
O -1.029072 -10.337075 -2.350652

O -0.064204 -4.555395 2.211070  
O -0.548870 -8.638187 1.526856  
O 2.177339 -6.814816 -3.102398  
O 2.256887 -10.734476 2.877560  
O 1.273719 -6.954297 3.010507  
O -1.949237 -5.812644 0.626409  
O 3.337583 -9.334697 -2.454808  
O -2.424543 -6.790503 -3.369635  
O -5.270203 -9.191230 0.335290  
O -0.452839 -6.799204 -5.750453  
O -0.178102 -8.065551 -3.550365  
O 2.161535 -4.572612 -1.022514  
O -2.366381 -10.266394 0.172658  
O 0.483878 -10.891763 0.281772  
O -3.165570 -8.059658 1.285980  
O 1.524219 -9.196846 -5.054532  
O 1.525997 -2.334454 0.749209  
O -0.286072 -3.836408 -0.265662  
O -1.837837 -9.401711 -4.980738  
O -2.557185 -4.345900 -1.725215  
O -1.772638 -6.707898 3.216131  
O -0.904454 -10.857930 2.759523  
O -3.835145 -9.940593 2.887152  
O 3.248289 -7.159550 -0.380767  
O -1.486319 -2.032318 1.090856  
O -0.241683 -5.763011 -2.069596  
O -3.734323 -9.381313 -2.428967

#### Glucose

84

O -0.154907 0.266715 0.104460  
C -0.379897 0.938319 1.423591  
H 0.147177 0.249661 2.125309  
C 0.355001 2.297330 1.453429  
H -0.027770 2.856748 2.342545  
C 0.076893 3.171366 0.191953  
C 0.336134 2.357725 -1.098586  
C -0.518720 1.073765 -1.091704  
H -0.237697 0.381050 -1.930948  
O 1.765458 2.117712 1.645116  
H 2.105342 1.862153 0.746518  
H 0.803879 4.018496 0.232637  
O 1.748759 2.036317 -1.149860  
H 1.859797 1.311716 -1.812266  
C -1.899684 1.022256 1.782740  
O -2.743500 0.164848 0.981517  
H -2.375480 -0.771516 1.106918  
H -2.261931 2.060571 1.625866  
O -1.246444 3.725756 0.166990  
H -1.793934 3.023980 -0.283737  
H 0.019505 2.976668 -1.977881  
O -1.886899 1.403163 -1.097643  
H -2.346252 0.766599 -0.423896  
H -2.015137 0.771208 2.863630  
O -0.845661 -4.134183 -3.953440

O -4.852524 -6.893668 2.850455  
O 2.958332 -5.067578 1.815137  
O 2.047992 -8.884257 1.199393  
Ti -1.505241 -3.944335 1.502157  
Ti -3.179831 -6.170673 2.305662  
Ti -4.812573 -8.586946 2.070690  
O 4.017088 -7.965483 2.573791  
O 1.109888 -8.609220 -1.328730  
Ti -0.795583 -3.725589 -2.122194  
Ti 1.586600 -4.236931 0.863076  
O -0.333362 -1.911580 -1.786025  
O -1.745259 -8.025085 -1.163782  
Ti -3.749379 -8.691969 -0.655270  
Ti -2.195274 -9.755997 1.948605  
Ti 3.515677 -9.692448 2.083929  
Ti -0.207408 -6.701795 2.143245  
Ti -0.210999 -8.418069 -5.365597  
Ti 2.993332 -9.030942 -0.667198  
Ti 0.009687 -1.870862 0.053609  
Ti 2.707278 -6.903825 1.728392  
Ti -0.601381 -9.621714 -0.740256  
Ti 0.647527 -10.251344 1.941956  
Ti 1.805752 -8.564864 -3.262135  
Ti -2.402930 -6.122852 -1.274404  
Ti 1.694764 -6.267726 -1.306176  
Ti -2.098036 -8.800639 -3.161491  
Ti -0.791537 -5.981269 -3.937824  
O -3.006165 -4.321466 2.529339  
O 4.161315 -10.077961 0.404501  
O 0.973375 -6.324942 0.568571  
O -4.041391 -6.801295 -0.954402  
O -1.041557 -10.231843 -2.371346  
O 0.011210 -4.622458 2.330624  
O -0.547582 -8.645777 1.517485  
O 2.254496 -6.806575 -3.053193  
O 2.227095 -10.798764 2.851718  
O 1.300129 -7.054518 3.057017  
O -1.937581 -5.774488 0.713737  
O 3.269952 -9.409328 -2.454488  
O -2.412591 -6.647905 -3.295683  
O -5.295262 -9.097459 0.342447  
O -0.441825 -6.624540 -5.694882  
O -0.169399 -7.948560 -3.525672  
O 2.247019 -4.594859 -0.917716  
O -2.395894 -10.202545 0.147066  
O 0.455646 -10.879243 0.236470  
O -3.175663 -8.013970 1.306032  
O 1.495825 -9.098507 -5.059370  
O 1.613548 -2.346727 0.855623  
O -0.237891 -3.817162 -0.128013  
O -1.851716 -9.219345 -4.981463  
O -2.473420 -4.244744 -1.620200  
O -1.746728 -6.757764 3.274251  
O -0.940787 -10.878336 2.712129

O -3.848452 -9.929023 2.872565  
O 3.279001 -7.209158 -0.352009  
O -1.389394 -2.046757 1.303310  
O -0.154812 -5.675437 -2.028841  
O -3.746678 -9.242476 -2.430771

**Galic-acid**

78

C 0.100248 4.366051 -0.164607  
C 0.100031 4.464026 2.314662  
C -0.024232 2.960468 -0.109396  
C -0.098294 3.064217 2.376477  
C 0.155319 5.108370 1.046782  
C -0.149448 2.331481 1.160004  
O 0.365757 6.504603 0.976174  
H -0.525004 6.935989 1.027861  
C -0.326681 0.856540 1.170813  
O 0.042723 0.182036 0.131133  
O -0.872587 0.281898 2.220112  
H -1.061100 -0.757624 1.923291  
O 0.166373 5.017136 -1.376414  
H -0.047634 2.358583 -1.041455  
O 0.228298 5.202821 3.471417  
H -0.177970 2.550701 3.356682  
H 0.331082 5.967528 -1.136313  
H 0.437475 6.122181 3.158228  
O -0.850093 -4.211933 -4.030142  
O -4.824092 -6.776329 2.842225  
O 2.976919 -5.061642 1.745267  
O 2.055477 -8.878537 1.203960  
Ti -1.438794 -3.891857 1.419302  
Ti -3.133352 -6.092860 2.284137  
Ti -4.803765 -8.493760 2.119504  
O 4.037987 -7.956396 2.554842  
O 1.115892 -8.657073 -1.340440  
Ti -0.777795 -3.778539 -2.197144  
Ti 1.603285 -4.239313 0.784453  
O -0.267082 -1.974544 -1.925136  
O -1.732142 -8.033604 -1.141350  
Ti -3.735851 -8.691380 -0.600471  
Ti -2.194591 -9.703381 2.016446  
Ti 3.521679 -9.686730 2.091330  
Ti -0.188912 -6.668175 2.111585  
Ti -0.228866 -8.507313 -5.374825  
Ti 2.995109 -9.070115 -0.675255  
Ti 0.107251 -1.840087 -0.112719  
Ti 2.727893 -6.899281 1.698437  
Ti -0.602813 -9.623514 -0.702136  
Ti 0.648574 -10.209583 1.994945  
Ti 1.807449 -8.611824 -3.275815  
Ti -2.394236 -6.135522 -1.292148  
Ti 1.695916 -6.304147 -1.343792  
Ti -2.101938 -8.826992 -3.130997  
Ti -0.798949 -6.049077 -3.991623  
O -2.949270 -4.241572 2.448292

O 4.149870 -10.120785 0.417449  
 O 0.985810 -6.339898 0.529775  
 O -4.028785 -6.803005 -0.942949  
 O -1.044402 -10.254977 -2.322327  
 O 0.060602 -4.572640 2.264040  
 O -0.543378 -8.614244 1.548615  
 O 2.259788 -6.856644 -3.085040  
 O 2.231054 -10.767687 2.891070  
 O 1.320644 -7.029576 3.026684  
 O -1.895078 -5.758117 0.682948  
 O 3.276972 -9.448886 -2.459596  
 O -2.417840 -6.715273 -3.318782  
 O -5.289731 -9.047754 0.404627  
 O -0.463290 -6.725340 -5.742738  
 O -0.166452 -7.997650 -3.542814  
 O 2.253989 -4.634127 -0.998761  
 O -2.401292 -10.179756 0.220592  
 O 0.444290 -10.870579 0.305014  
 O -3.158916 -7.965225 1.339861  
 O 1.487889 -9.165122 -5.065908  
 O 1.707638 -2.363943 0.665947  
 O -0.225582 -3.824295 -0.205956  
 O -1.866981 -9.292880 -4.946334  
 O -2.463622 -4.271086 -1.676953  
 O -1.708680 -6.671033 3.266227  
 O -0.941239 -10.819056 2.788005  
 O -3.847427 -9.829258 2.951874  
 O 3.285814 -7.244943 -0.376111  
 O -1.255730 -1.985968 1.249248  
 O -0.154558 -5.721436 -2.079286  
 O -3.738766 -9.272071 -2.366360

#### **Anthraquinone**

84

C 0.001552 3.683271 1.278598  
 C 0.009553 3.621862 -1.288464  
 C 0.056129 2.253251 1.306329  
 C 0.064253 2.190700 -1.251036  
 C -0.067437 3.702111 3.730152  
 C -0.047270 3.528170 -3.737811  
 C -0.028876 2.281964 3.754879  
 C -0.008866 2.108642 -3.697333  
 C -0.004092 4.436448 -0.023854  
 C 0.136390 1.488492 0.044876  
 O -0.033951 5.684001 -0.052538  
 O 0.275013 0.223719 0.084026  
 C -0.053170 4.399243 2.497464  
 C 0.037727 1.555978 2.545868  
 C -0.039401 4.281501 -2.538450  
 C 0.051343 1.434889 -2.457158  
 H -0.112970 4.270872 4.683359  
 H -0.088536 4.053395 -4.715992  
 H -0.048191 1.737949 4.722939  
 H -0.026126 1.520904 -4.640030  
 H -0.086931 5.508824 2.454760

H -0.073831 5.392084 -2.546733  
H 0.065729 0.444361 2.540748  
H 0.071182 0.322207 -2.405964  
O -0.806105 -4.126104 -3.954495  
O -4.832368 -6.790595 2.850408  
O 2.984921 -5.054309 1.811937  
O 2.038746 -8.860923 1.193877  
Ti -1.461406 -3.872711 1.455154  
Ti -3.145551 -6.095609 2.284420  
Ti -4.819605 -8.492914 2.098443  
O 4.021862 -7.965818 2.565133  
O 1.106555 -8.615375 -1.348499  
Ti -0.781439 -3.698610 -2.119602  
Ti 1.603895 -4.207184 0.871689  
O -0.363573 -1.891819 -1.808297  
O -1.738078 -7.995935 -1.152085  
Ti -3.752884 -8.643665 -0.621250  
Ti -2.206290 -9.691803 1.976364  
Ti 3.505359 -9.682270 2.063051  
Ti -0.198054 -6.647972 2.130145  
Ti -0.237882 -8.406495 -5.356546  
Ti 2.980284 -8.998762 -0.683007  
Ti 0.057695 -1.816005 0.044538  
Ti 2.720305 -6.883605 1.722807  
Ti -0.617173 -9.587921 -0.726299  
Ti 0.632349 -10.206791 1.962681  
Ti 1.813214 -8.505359 -3.275104  
Ti -2.378064 -6.090231 -1.261501  
Ti 1.703259 -6.209431 -1.307598  
Ti -2.117139 -8.778890 -3.144230  
Ti -0.779510 -5.970585 -3.923933  
O -2.984753 -4.243177 2.456870  
O 4.137291 -10.072126 0.378599  
O 0.995633 -6.299785 0.561725  
O -4.020794 -6.746299 -0.915668  
O -1.076353 -10.214203 -2.347539  
O 0.044684 -4.561745 2.316423  
O -0.555805 -8.596968 1.522394  
O 2.236904 -6.742611 -3.068797  
O 2.217157 -10.781560 2.848589  
O 1.307111 -7.026886 3.044184  
O -1.873430 -5.755277 0.709218  
O 3.293063 -9.329635 -2.474192  
O -2.408829 -6.626224 -3.287786  
O -5.312436 -9.008071 0.371255  
O -0.464410 -6.619384 -5.692128  
O -0.179195 -7.943100 -3.518769  
O 2.260685 -4.546275 -0.933158  
O -2.422935 -10.158144 0.178637  
O 0.414501 -10.856060 0.268575  
O -3.173474 -7.956591 1.323995  
O 1.496439 -9.037296 -5.072982  
O 1.657361 -2.338564 0.873908  
O -0.187685 -3.787960 -0.151269

O -1.878677 -9.212825 -4.962283  
O -2.461857 -4.218451 -1.611077  
O -1.727532 -6.678730 3.276107  
O -0.955369 -10.801849 2.763406  
O -3.865753 -9.841948 2.903967  
O 3.282944 -7.181557 -0.360061  
O -1.308959 -1.989555 1.271806  
O -0.157052 -5.669185 -2.014400  
O -3.762733 -9.210728 -2.393333

### Resveratrol

89

C -0.071870 4.479419 0.273945  
C 0.207588 1.661013 0.105323  
O 0.372027 0.261076 -0.056939  
H 0.064360 -0.068262 -0.966244  
C 1.213137 3.860439 0.330232  
C 1.364224 2.459651 0.243744  
C -1.221230 3.634139 0.166634  
C -1.088687 2.232530 0.086271  
H 2.107857 4.511028 0.418072  
H 2.365717 1.979786 0.251945  
H -2.232690 4.085096 0.132624  
H -1.980271 1.576594 -0.003982  
C -0.136268 5.949162 0.295272  
C -1.270638 6.723245 0.235571  
H 0.854714 6.451426 0.344715  
H -2.266071 6.228755 0.198303  
C -1.311129 8.195881 0.203332  
C -0.129055 8.992689 0.160315  
H 0.874774 8.525708 0.154682  
C -2.585491 8.830400 0.196566  
H -3.509906 8.217459 0.223880  
C -0.233118 10.400859 0.109988  
C -2.674926 10.243339 0.152227  
O 0.945935 11.135620 0.054670  
O -3.941967 10.813202 0.149316  
H 0.673667 12.083231 0.023045  
H -3.799527 11.788913 0.114612  
C -1.502607 11.038324 0.108443  
H -1.574947 12.150250 0.067459  
O -0.635222 -3.863025 -3.613948  
O -4.778794 -6.743414 3.039142  
O 3.112117 -5.250075 2.063042  
O 2.029575 -8.979232 1.271191  
Ti -1.296506 -3.892070 1.855491  
Ti -3.060610 -6.088637 2.543869  
Ti -4.824193 -8.399372 2.188257  
O 4.033450 -8.232284 2.695403  
O 1.102991 -8.554961 -1.240535  
Ti -0.602730 -3.525934 -1.766379  
Ti 1.756621 -4.311757 1.191903  
O -0.146189 -1.757670 -1.336639  
O -1.723327 -7.842209 -1.016857  
Ti -3.758257 -8.418215 -0.531444

Ti -2.260836 -9.697131 2.004525  
Ti 3.461107 -9.903022 2.107280  
Ti -0.116030 -6.750411 2.364113  
Ti -0.225227 -8.093865 -5.246971  
Ti 2.966782 -9.062712 -0.598711  
Ti 0.289378 -1.820850 0.571844  
Ti 2.781670 -7.068492 1.891712  
Ti -0.661162 -9.501853 -0.685374  
Ti 0.563583 -10.306827 1.971008  
Ti 1.804438 -8.402669 -3.162630  
Ti -2.277946 -5.902029 -1.022279  
Ti 1.759872 -6.206118 -1.086019  
Ti -2.121962 -8.497542 -3.059054  
Ti -0.683097 -5.707438 -3.690782  
O -2.818931 -4.260176 2.850922  
O 4.087296 -10.229968 0.408519  
O 1.058747 -6.350160 0.787966  
O -3.952264 -6.513963 -0.739430  
O -1.130251 -10.014922 -2.339745  
O 0.191415 -4.693546 2.633476  
O -0.558373 -8.636083 1.636655  
O 2.304450 -6.669853 -2.856684  
O 2.123764 -10.983055 2.826977  
O 1.378374 -7.235450 3.229490  
O -1.811491 -5.665279 0.970240  
O 3.242751 -9.335091 -2.408509  
O -2.328685 -6.342991 -3.091290  
O -5.334511 -8.778788 0.439483  
O -0.366249 -6.278003 -5.484079  
O -0.155167 -7.719692 -3.387452  
O 2.376043 -4.576318 -0.628024  
O -2.480217 -10.047097 0.186147  
O 0.336183 -10.847420 0.240363  
O -3.150911 -7.877053 1.455023  
O 1.462664 -8.840448 -4.983316  
O 1.861591 -2.432092 1.331997  
O -0.042635 -3.730705 0.221210  
O -1.901995 -8.842369 -4.897167  
O -2.305663 -4.023264 -1.311011  
O -1.656433 -6.778629 3.490537  
O -1.048921 -10.900188 2.719742  
O -3.924245 -9.830267 2.918258  
O 3.323009 -7.271188 -0.184205  
O -1.043447 -1.996879 1.803332  
O -0.063537 -5.533023 -1.748888  
O -3.784341 -8.896549 -2.328938
