# Supplementary figures and images for: Adsorption of Selected Molecules on (TiO2)20 Nano-Clusters: A Density-Functional-Theory Study
Source: MDPI journal article supplement (doi:10.3390/nanomanufacturing2030010), 2022-09-01

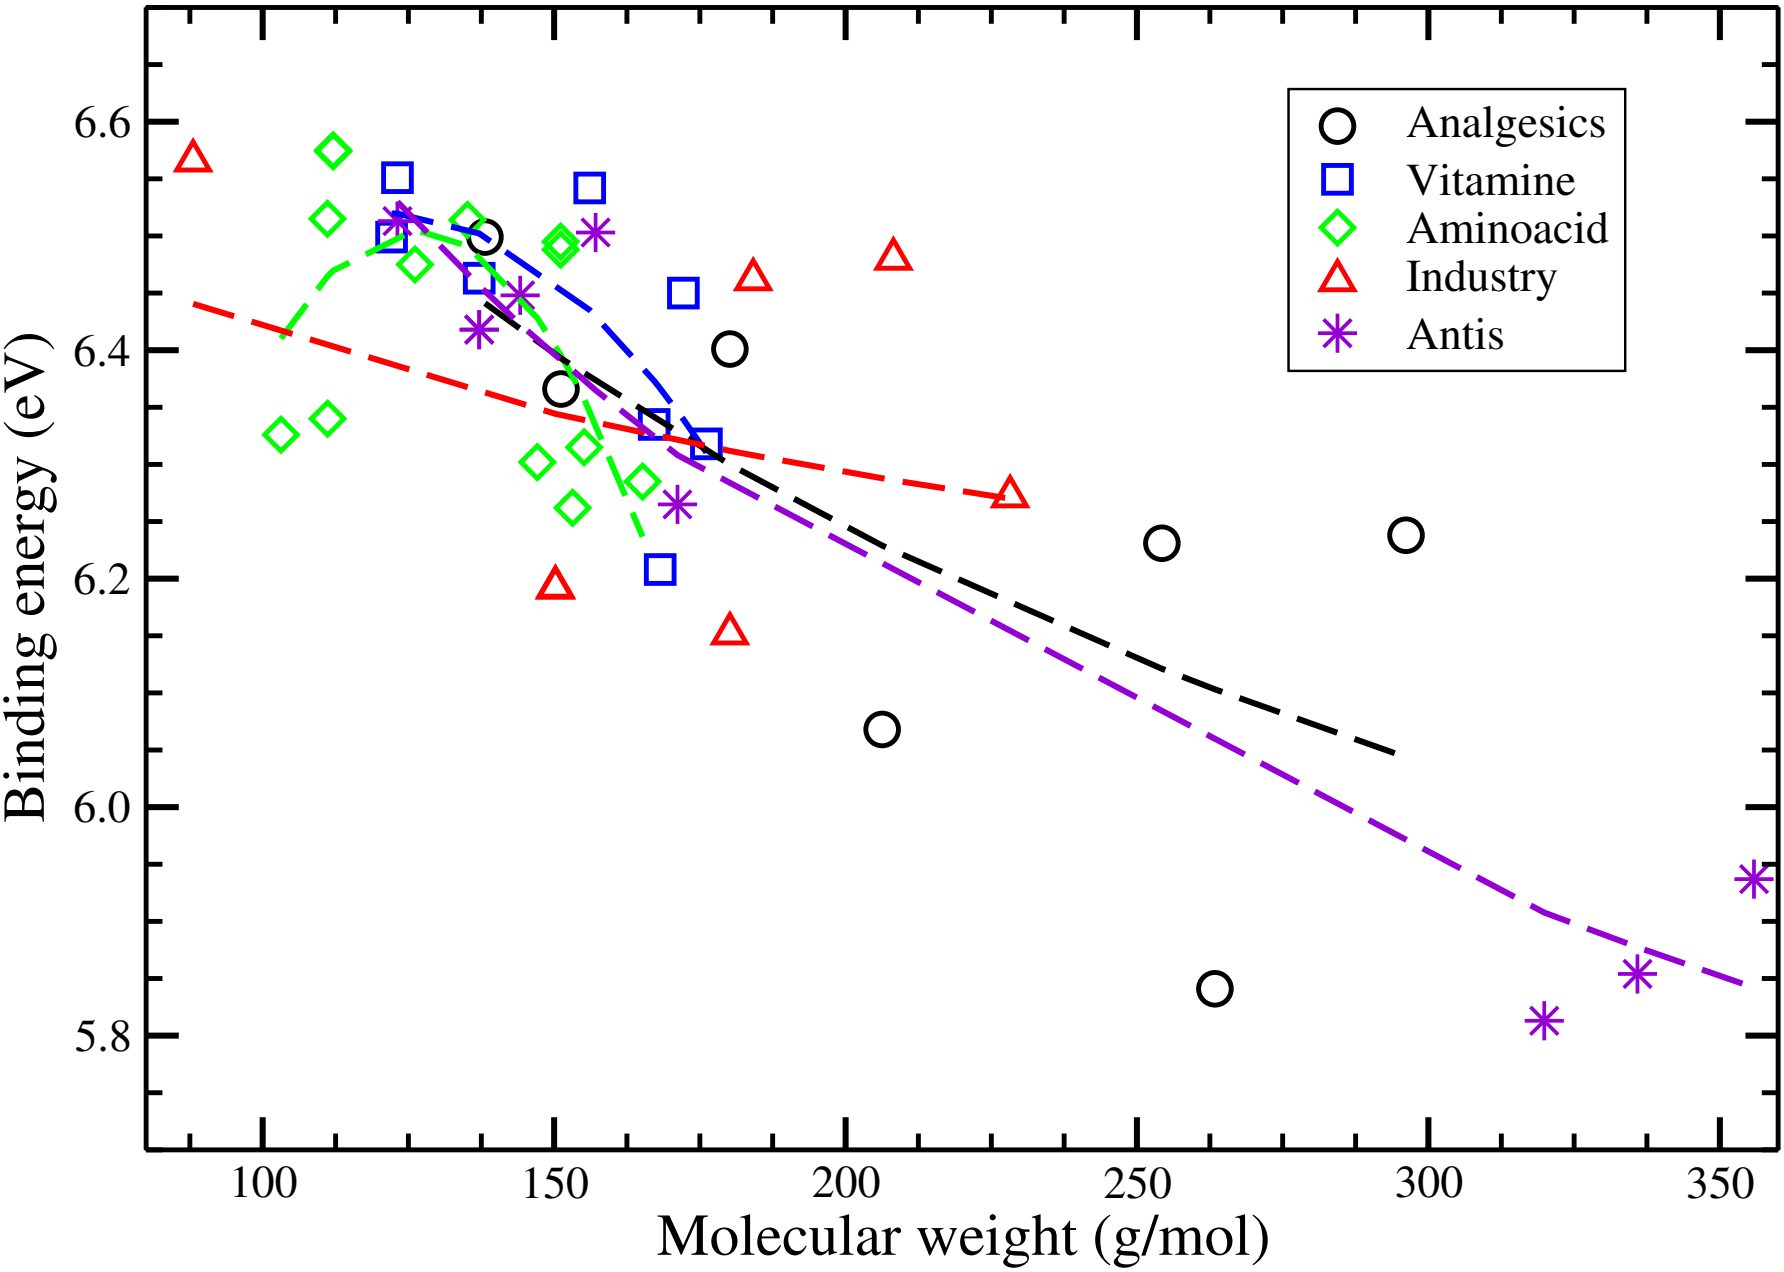

Supplement: s1 [file s1]

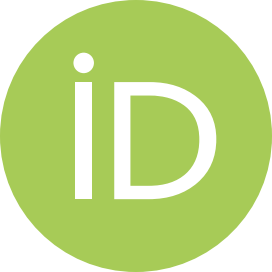

Supplement: s1 [file s1]

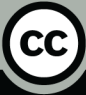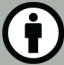

BY

Supplement: s1 [file s1]

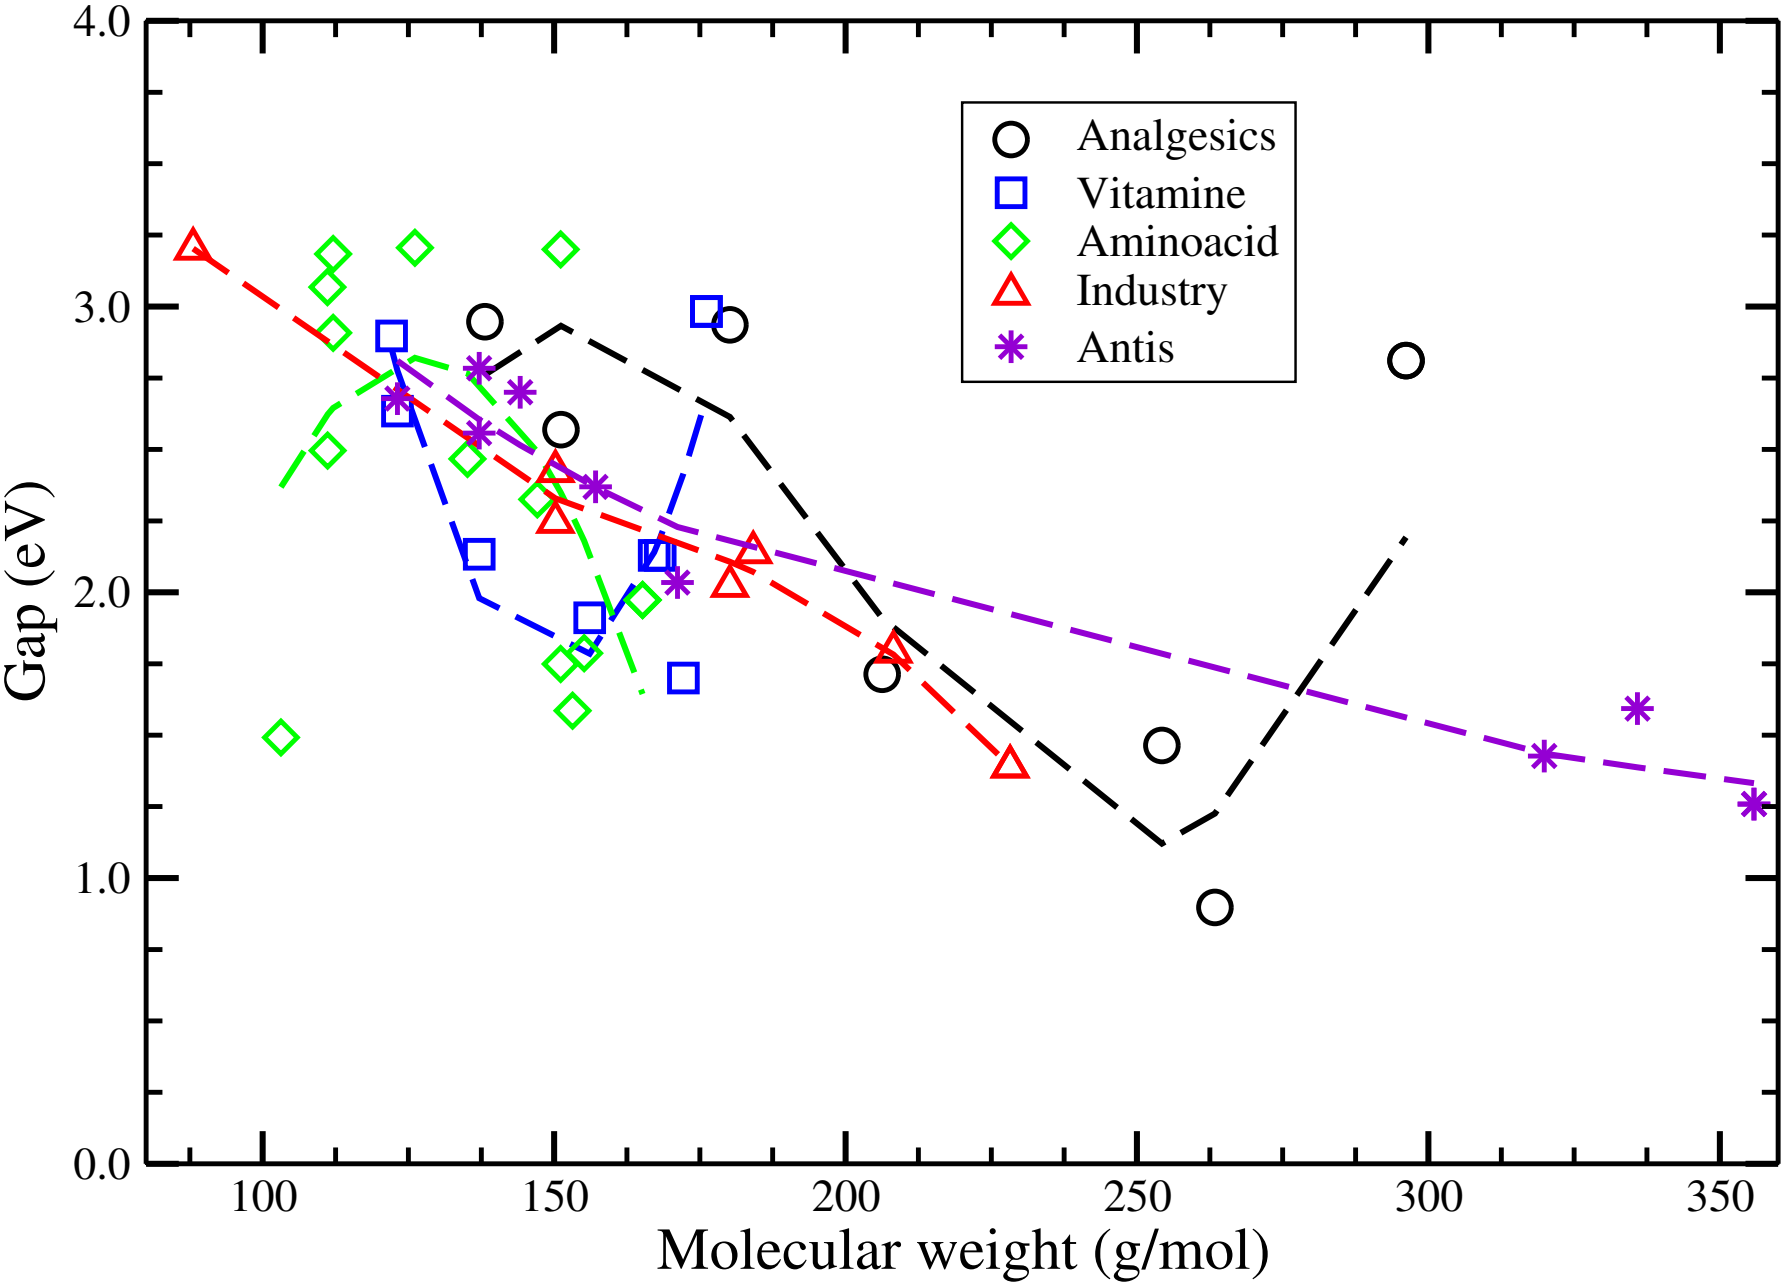

Supplement: s1 [file s1]

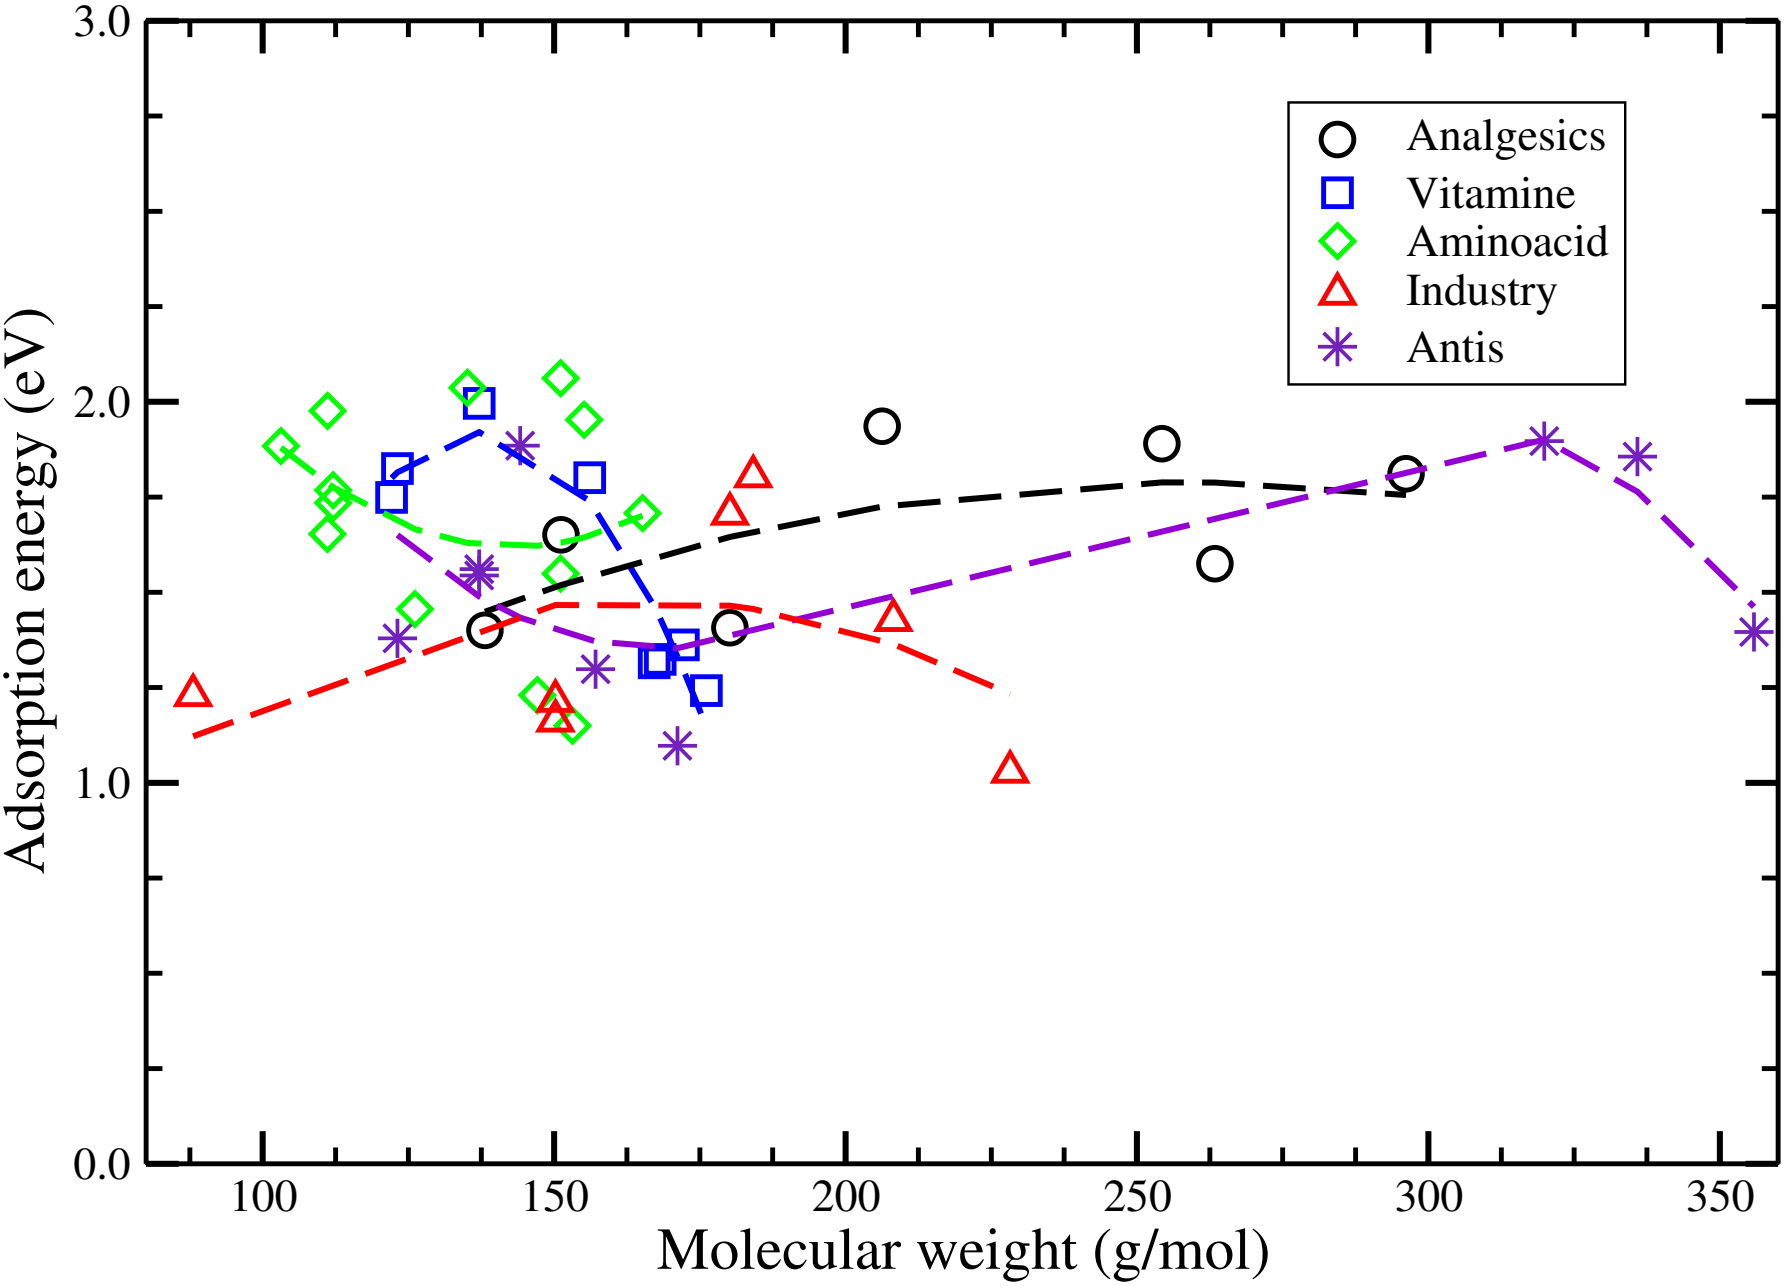

Supplement: s1 [file s1]

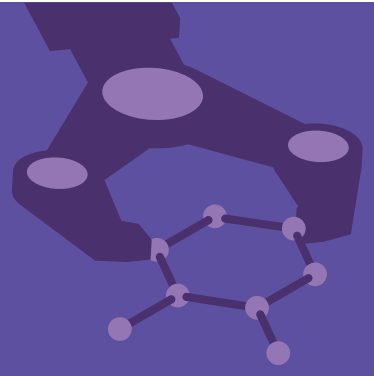

*nanomanufacturing*

Supplement: s1 [file s1]
